# Supplementary material for: Reduced human activity during COVID-19 alters avian land use across North America
Source: PubMed Central journal article supplement (PMC10763905; doi:10.1126/sciadv.abf5073), 2021-09-22
Supplement: sciadv.abf5073_sm.pdf [file sciadv.abf5073_sm.pdf]

Supplementary Materials for

**Reduced human activity during COVID-19 alters avian land  
use across North America**

Michael B. Schrimpf, Paulson G. Des Brisay, Alison Johnston, Adam C. Smith, Jessica Sánchez-Jasso,  
Barry G. Robinson, Miyako H. Warrington, Nancy A. Mahony, Andrew G. Horn,  
Matthew Strimas-Mackey, Lenore Fahrig, Nicola Koper\*

\*Corresponding author. Email: nicola.koper@umanitoba.ca

Published 22 September 2021, *Sci. Adv.* 7, eabf5073 (2021)  
DOI: 10.1126/sciadv.abf5073

**The PDF file includes:**

Supplementary Text  
Figs. S1 to S11  
Tables S1 to S5  
Legends for data S1 to S4

**Other Supplementary Material for this manuscript includes the following:**

Data S1 to S4

## **Supplementary Text**

### Model variables

Table S1 (p. 101) lists summary statistics for all the variables used in our models. Figures S1–S4 (pp. 3–6) and Table S2 (p. 102) describe the distribution of the distance traveled, duration, distance to road, distance to airport, and landcover (urban vs. rural) variables, and compares those distributions between the pre-pandemic and pandemic periods. The distribution of the change in traffic variable is displayed in the main text (Fig. 1A), and the overlap variable was specific to each species-by-county combination, and therefore not easily displayed (though, see Fig. 1B for a representative example).

Note that the model for each species only included a subset of counties, so the exact distribution of predictor data would have varied slightly for each.

Figures S5–S9 (pp. 7–11) compare the distributions of different predictors to assess collinearity.

### Model results

Figures S10 (pp. 12–17) and S11 (pp. 18–100) are multi-page figures that present all of the 95% credible intervals and interaction plots (respectively) for all 82 species and all five interaction terms used in the study. Captions for Figs. S10 and S11 are placed on the page preceding each, on pp. 12 and 18, respectively.

Tables S3–S5 (pp. 103–105) relate to our post-hoc assessment of results in relation to independent measures of detection.

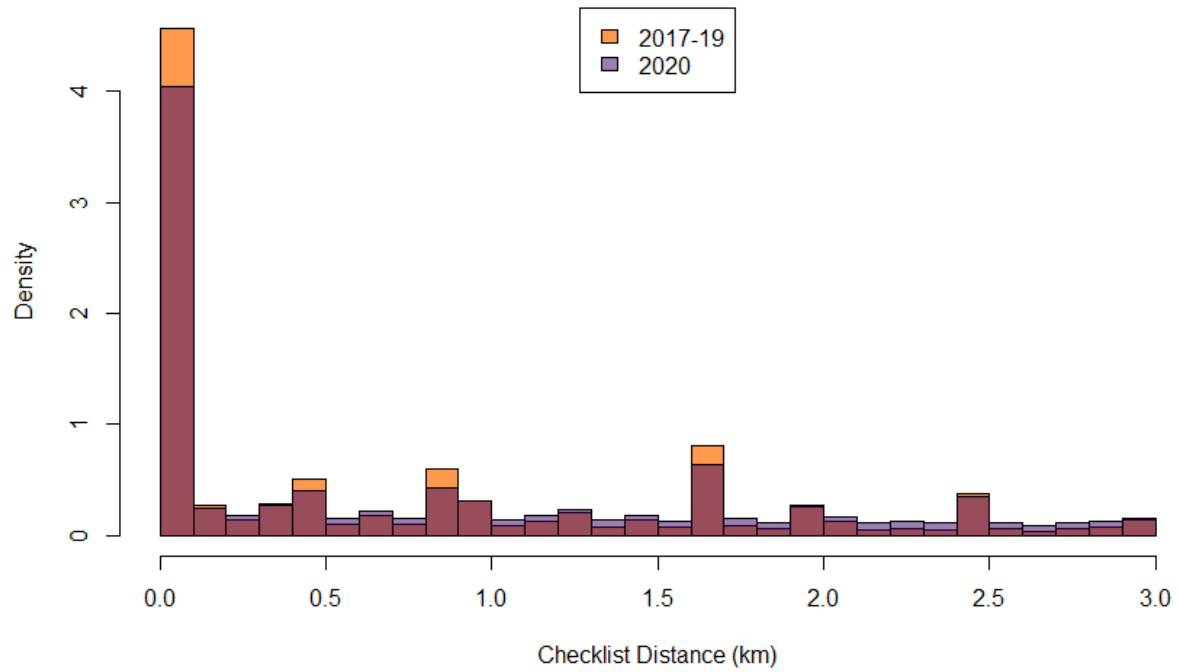

**Fig. S1.**

Distribution of distance traveled (in kilometers) recorded for all eBird checklists used in the analysis (from all counties), separated into the pre-pandemic and pandemic periods. The third color occurs where both histograms overlap.

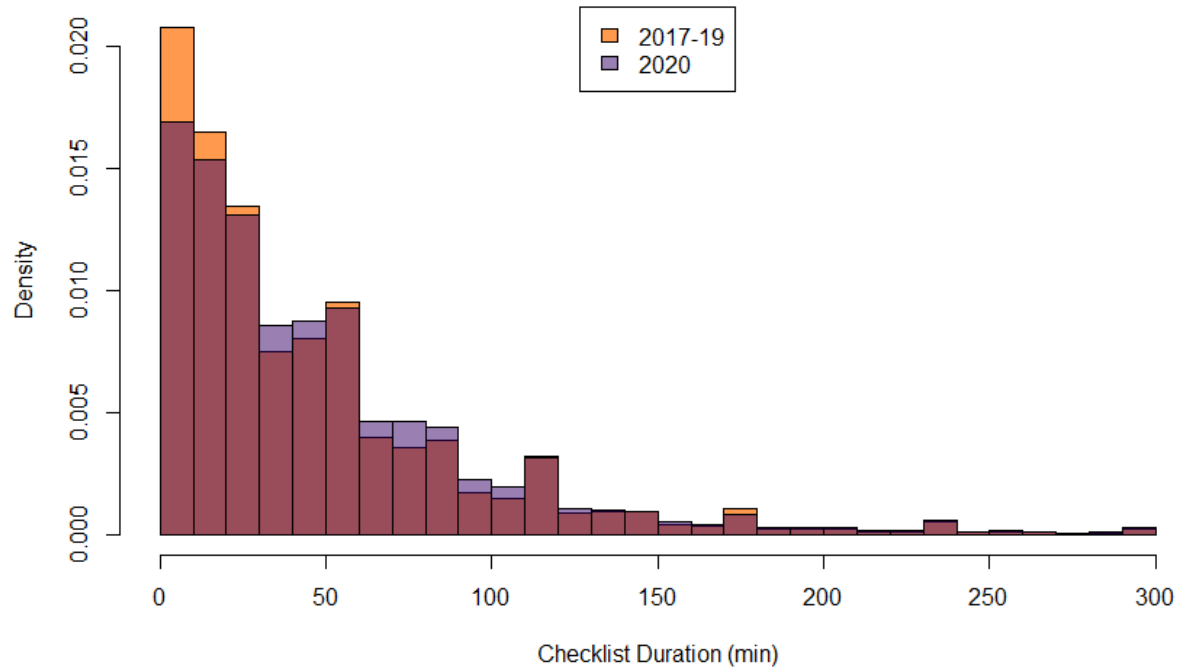

**Fig. S2.**

Distribution of duration (in minutes) recorded for all eBird checklists used in the analysis (from all counties), separated into the pre-pandemic and pandemic periods. The third color occurs where both histograms overlap.

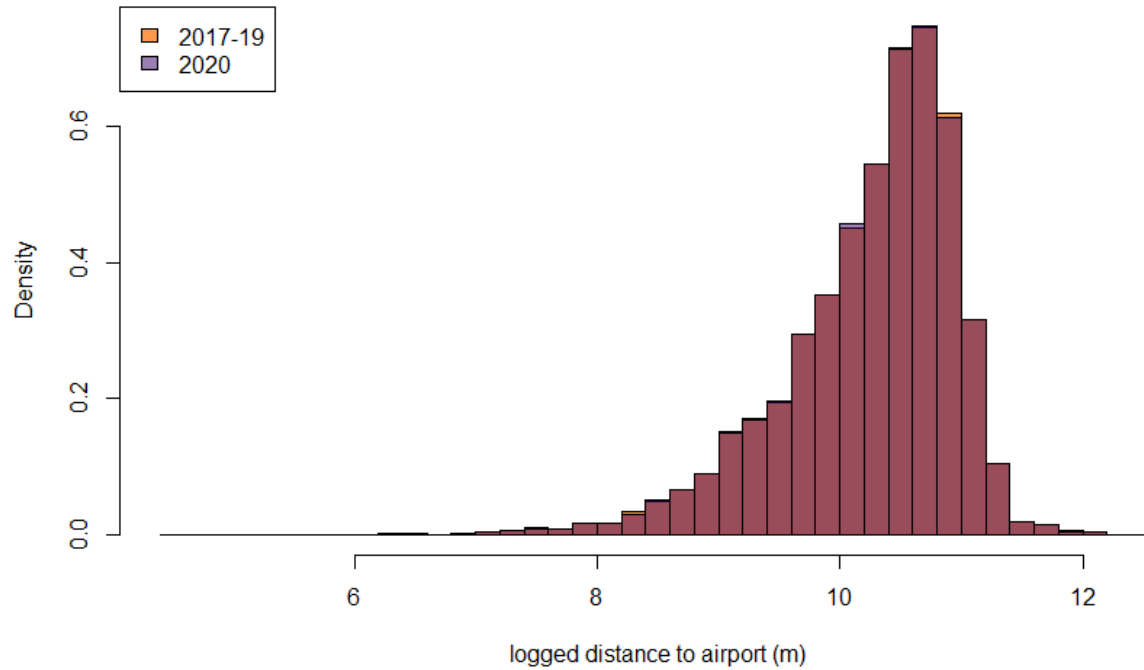

**Fig. S3.**

Distribution of logged distance to international airports recorded for all eBird checklists used in the analysis (from all counties), separated into the pre-pandemic and pandemic periods. The third color occurs where both histograms overlap.

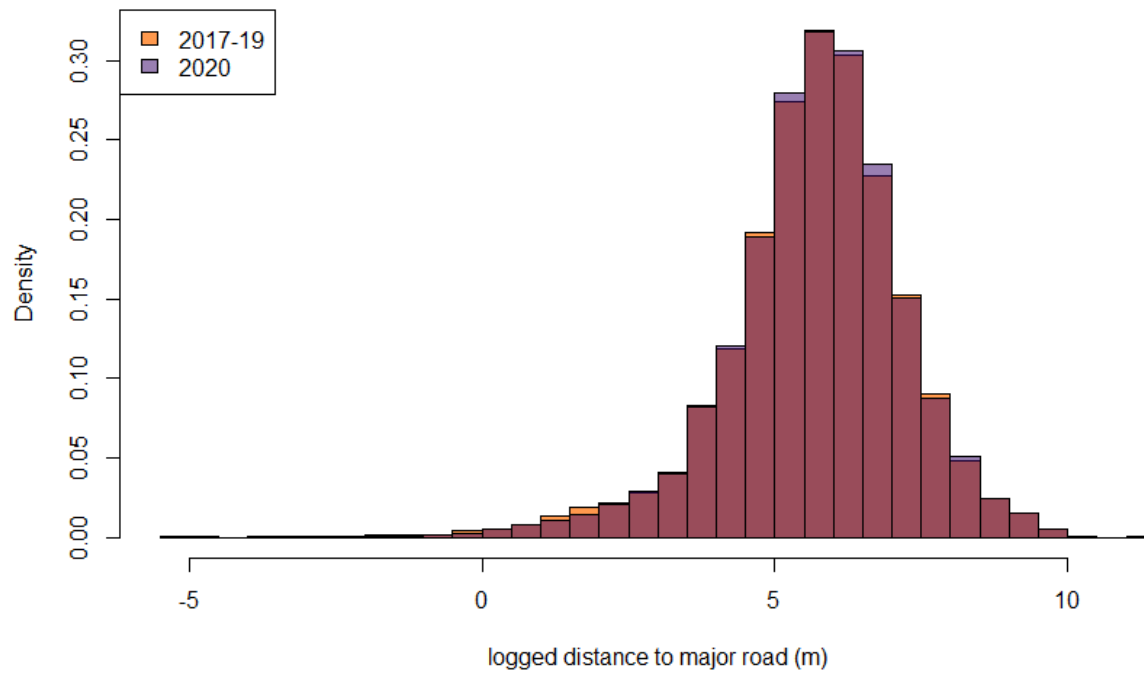

**Fig. S4.**

Distribution of logged distance to nearest major road recorded for all eBird checklists used in the analysis (from all counties), separated into the pre-pandemic and pandemic periods. The third color occurs where both histograms overlap.

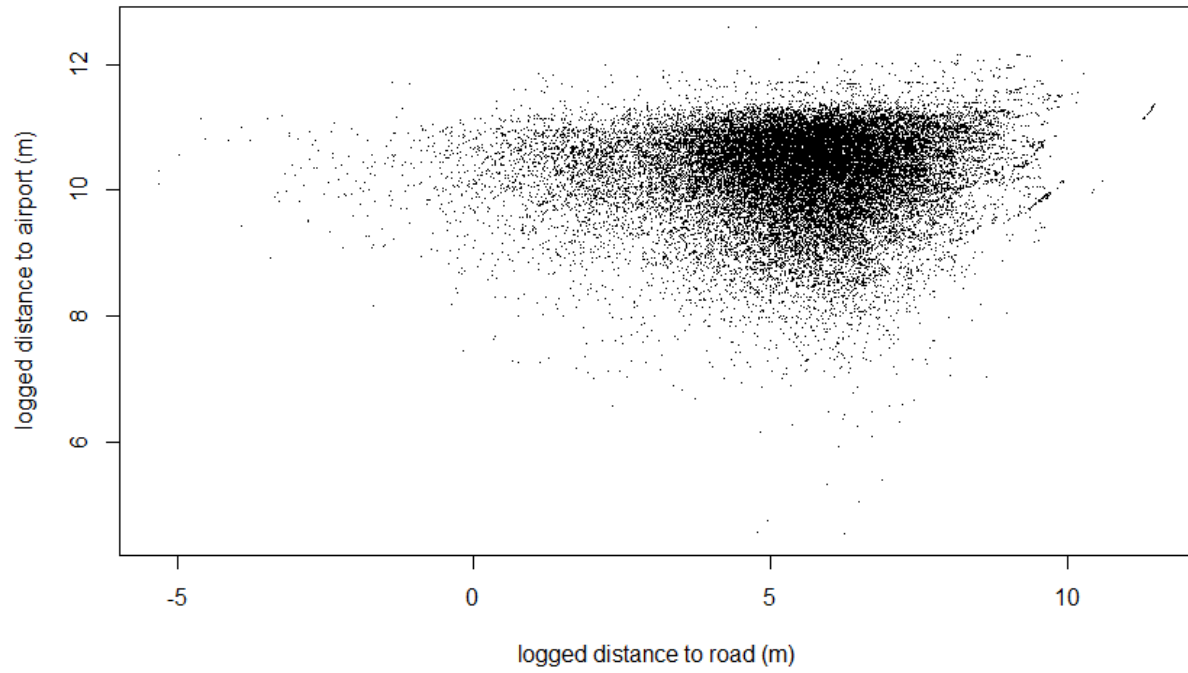

**Fig. S5.**

Plot of logged distance to road vs. logged distance to airport for all checklists. Pearson product moment correlation coefficient = 0.069 ( $t = 20.4$ ,  $df = 88604$ ,  $p < 0.001$ ).

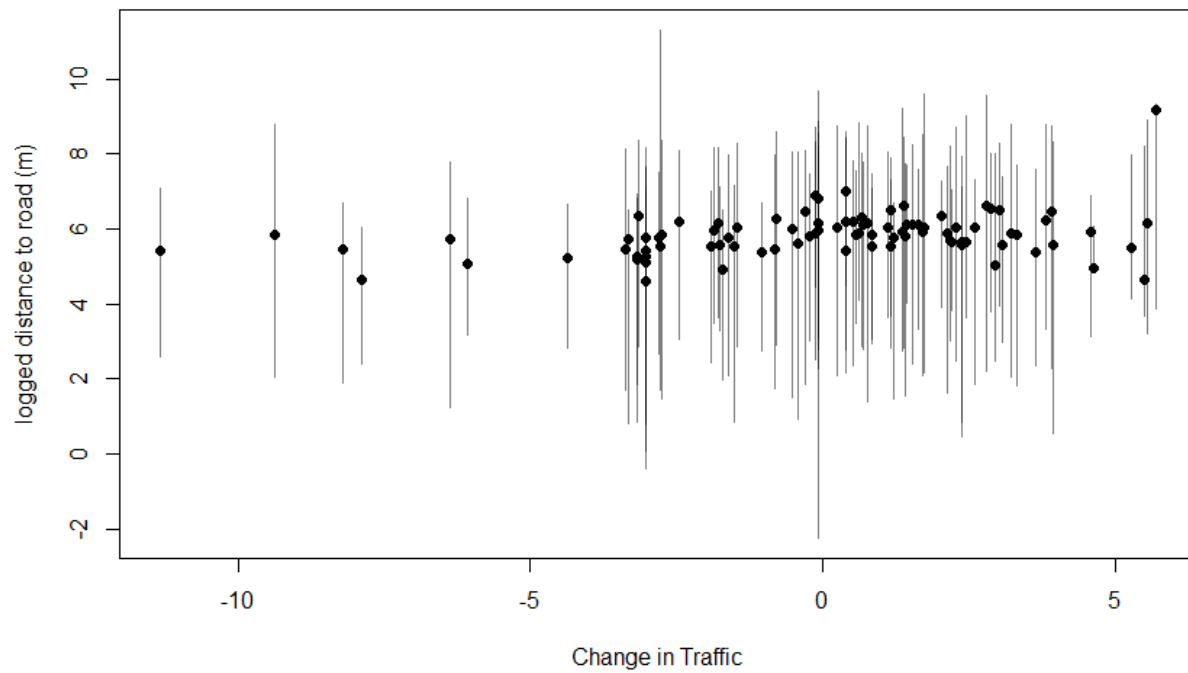

**Fig. S6.**

The relationship between the county-specific percent change in traffic during the pandemic (centered, such that 0 = the mean percent change) and the county-specific medians (points) and 2.5–97.5% quantiles (bars) of logged distance to major road.



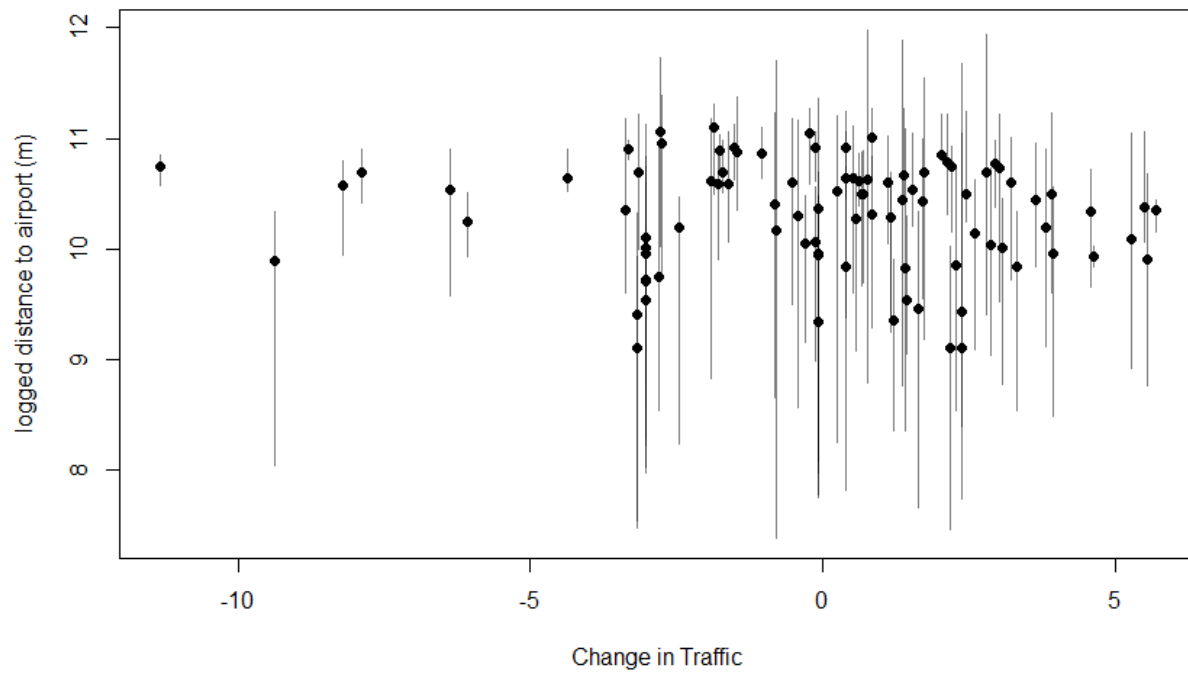

**Fig. S7.**

The relationship between the county-specific percent change in traffic during the pandemic (centered, such that 0 = the mean percent change) and the county-specific medians (points) and 2.5–97.5% quantiles (bars) of logged distance to airport.

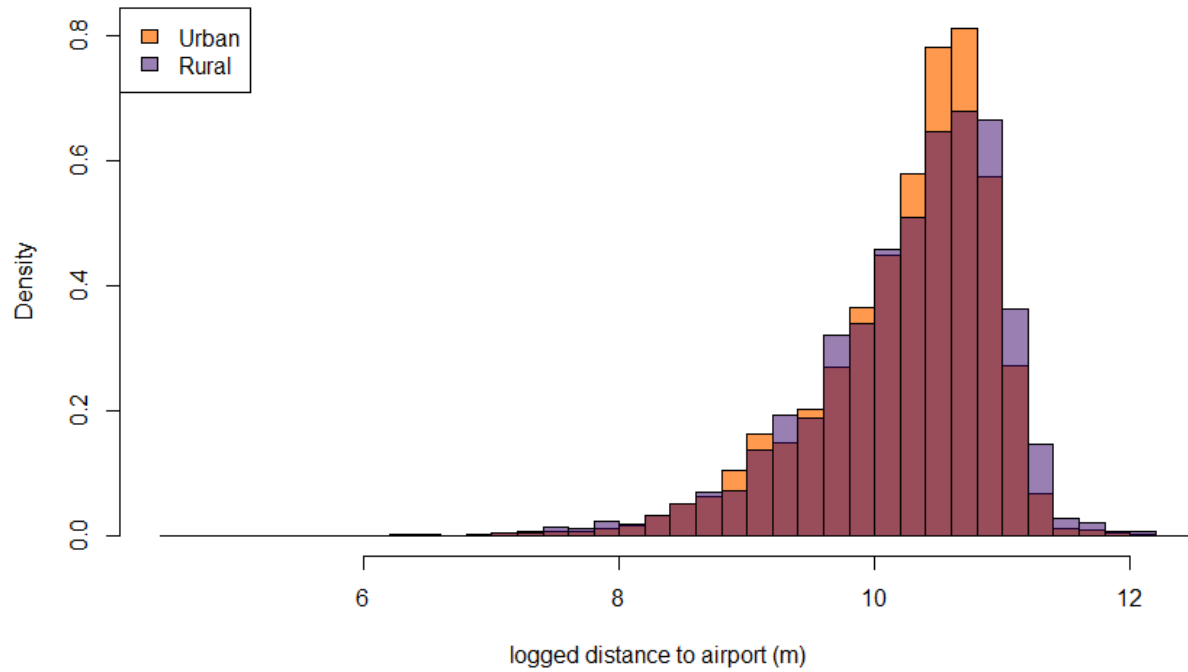

**Fig. S8.**

Distribution of logged distance to airport recorded for all eBird checklists used in the analysis (from all counties), separated into checklists coming from urban vs. rural habitat. The third color occurs where both histograms overlap.

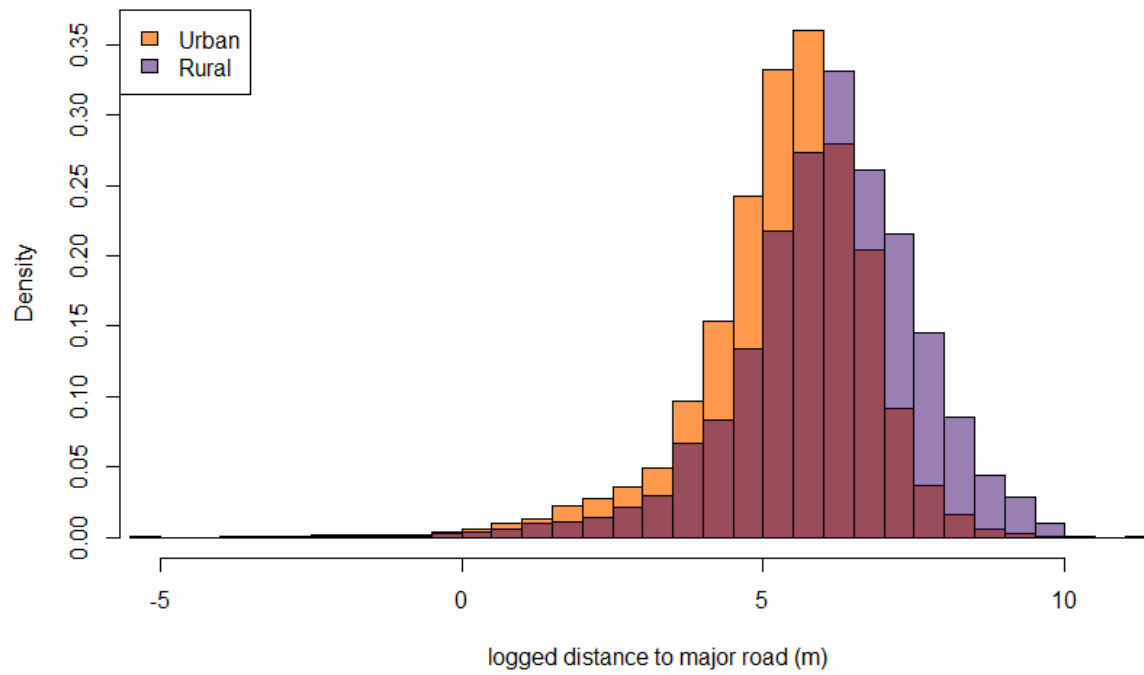

**Fig. S9.**

Distribution of logged distance to nearest major road recorded for all eBird checklists used in the analysis (from all counties), separated into checklists coming from urban vs. rural habitat. The third color occurs where both histograms overlap.

**Fig. S10.** (multi-page figure beginning on the next page)

**Interaction coefficient posterior distributions.** Medians and 95% credible intervals for all interaction coefficients for each species, labeled as: “overlap”: overlap between peak migration and peak travel reductions; “delta\_traf”: percent change in human mobility during pandemic; “land” urban versus rural habitat; “air”: distance to airport, and “road”: distance to major road. Species with 95% credible intervals that do not overlap zero are in bold. For ease of comparison, the sign of all intervals has been transformed such that positive values indicate increases in counts in areas where human activity was reduced.

pandemic:overlap interaction

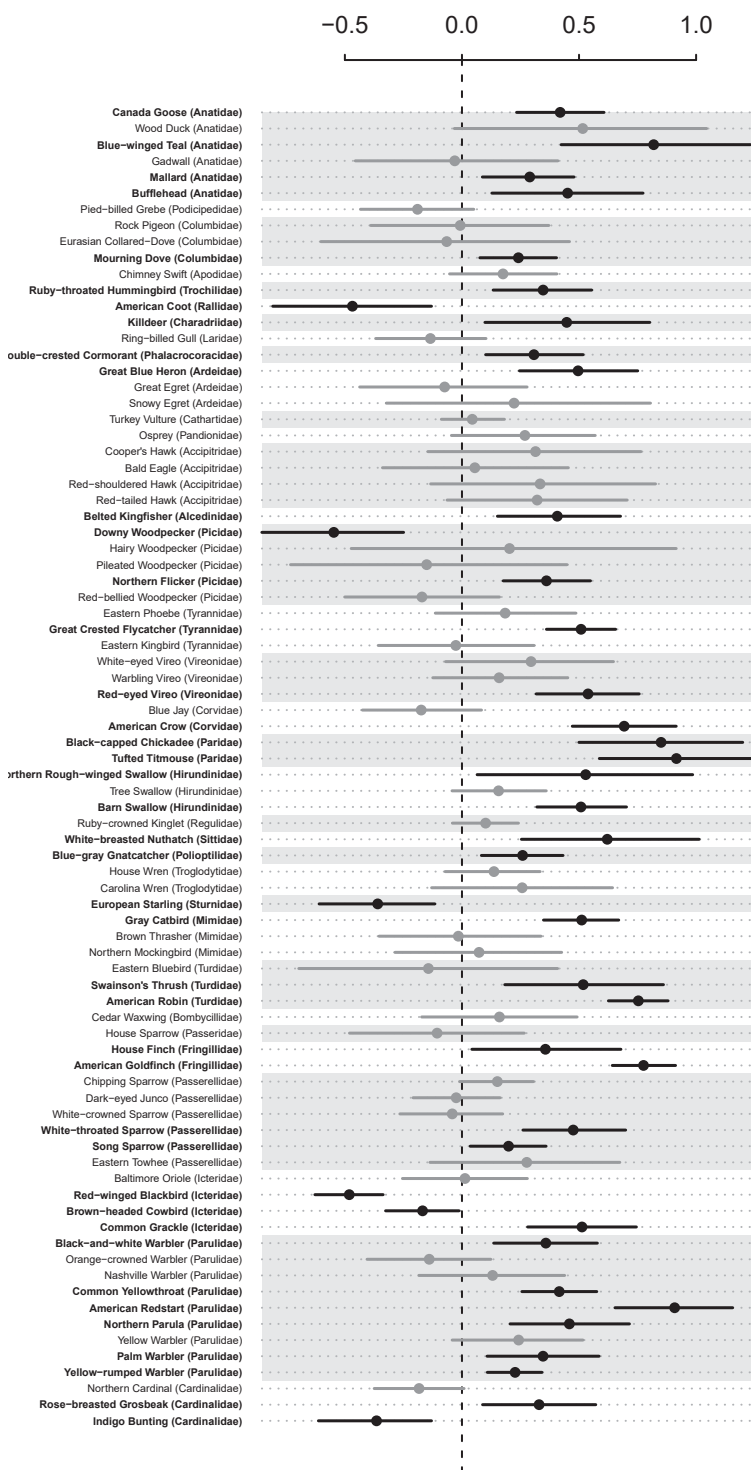

pandemic:delta\_traf interaction

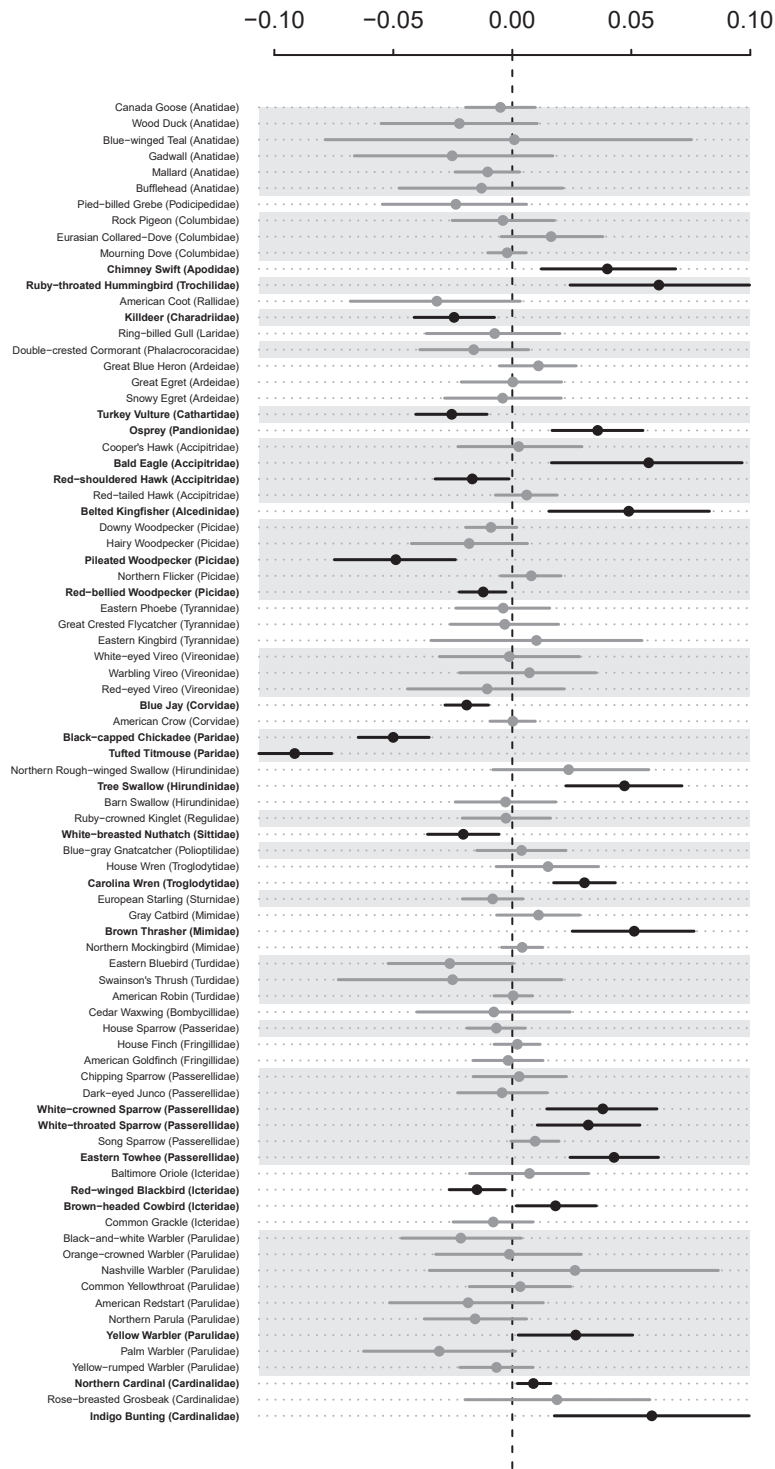

pandemic:land interaction

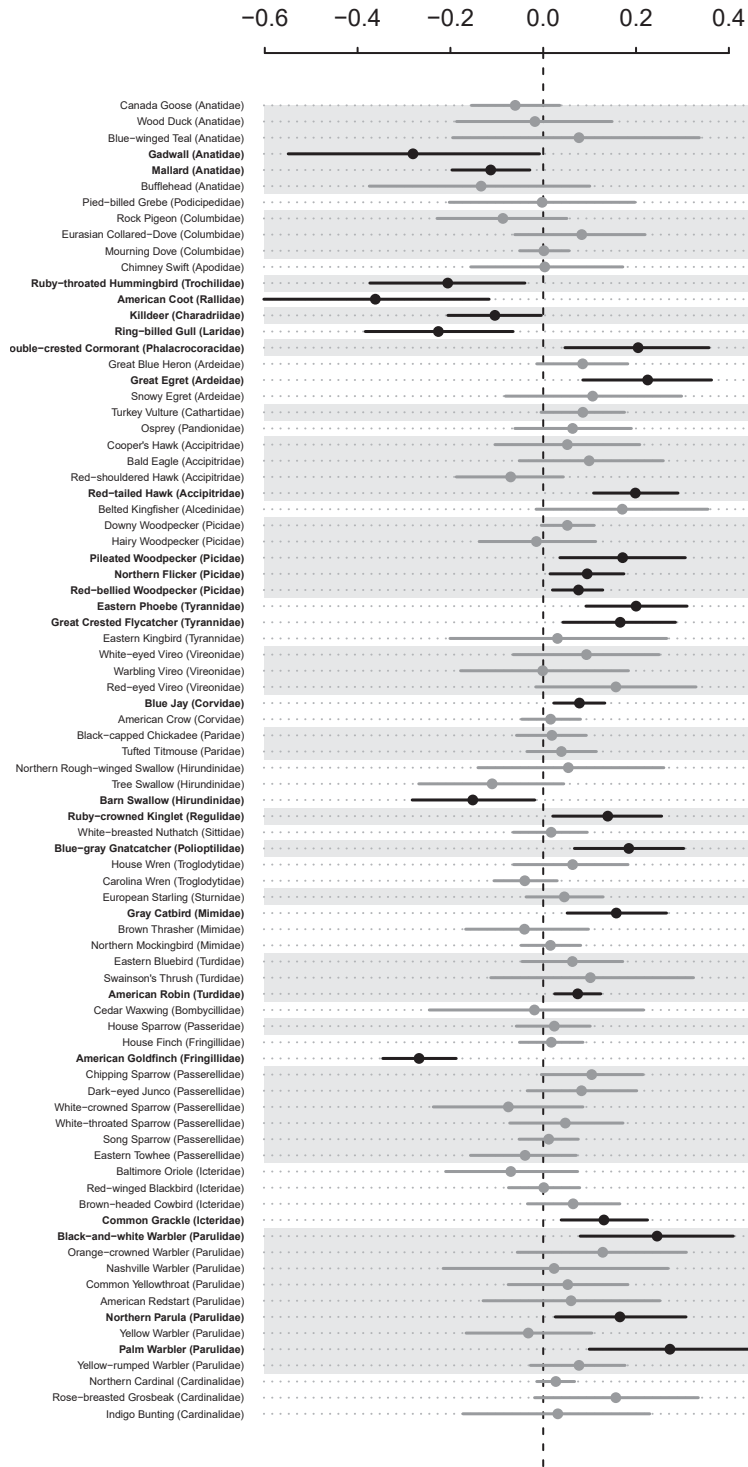

pandemic:air interaction

-0.2 0.0 0.2 0.4

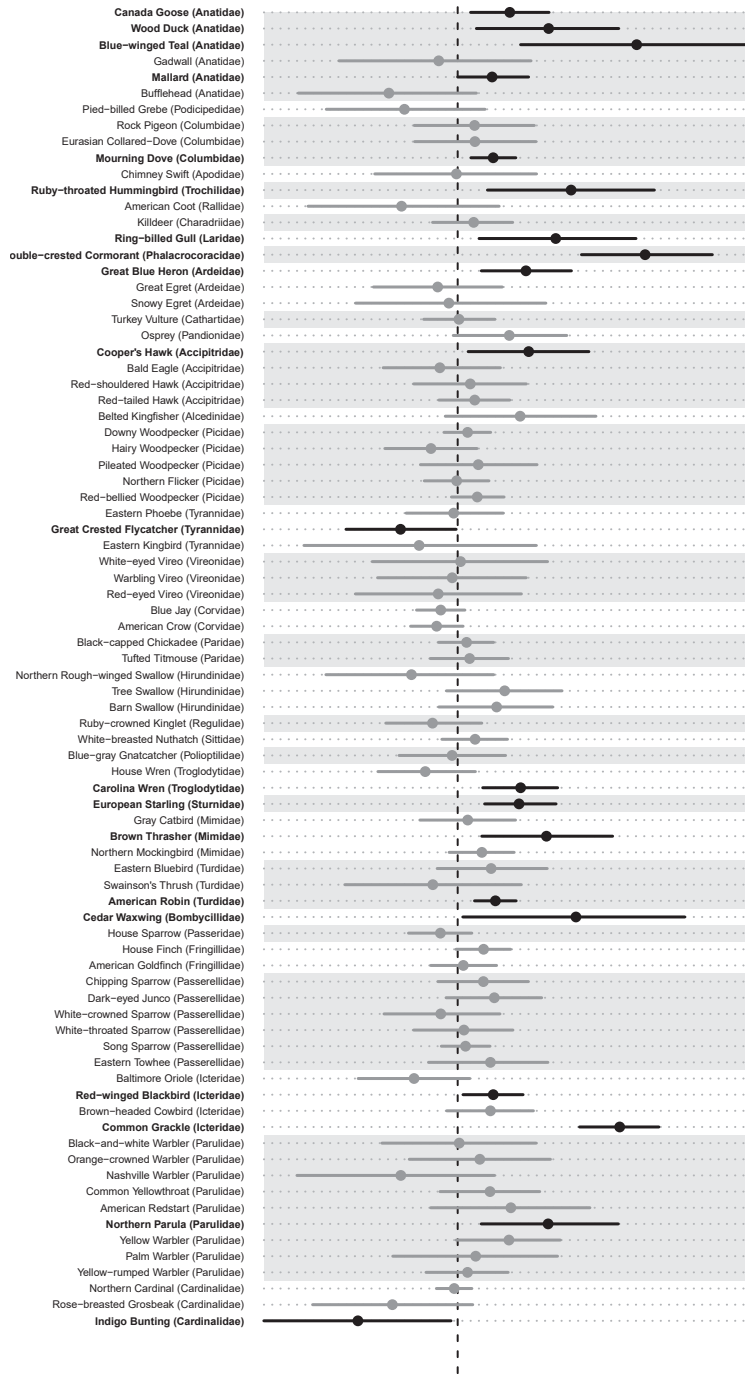



pandemic:road interaction

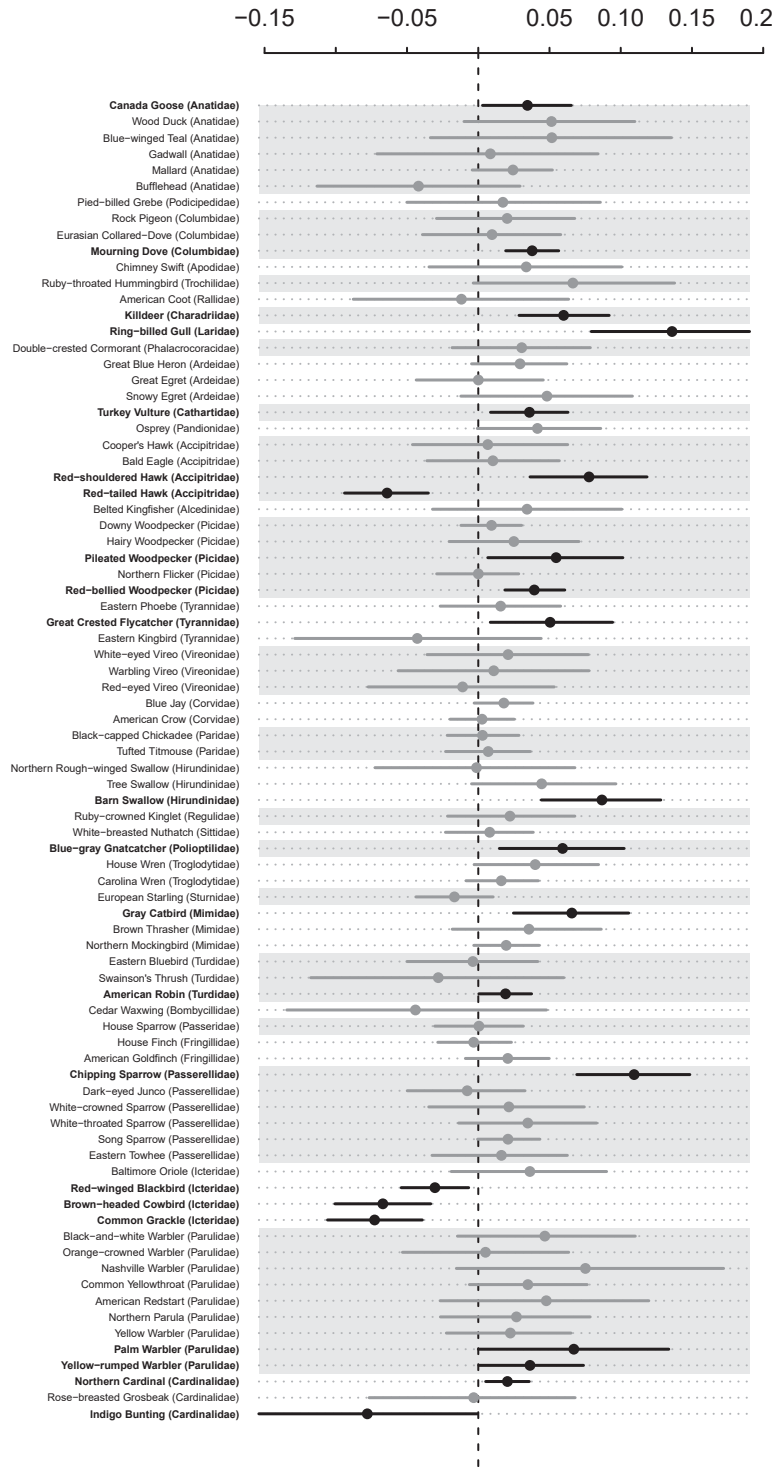

**Fig. S11.** (multi-page figure beginning on the next page)

**Interactions between period (pandemic/pre-pandemic) and focal variables describing pandemic-altered areas.** Marginal predicted mean count (lines or points) including 95% credible interval (shaded areas or error bars) of the effect of the focal variable on bird counts during the COVID-19 pandemic (purple) compared to the pre-pandemic baseline period (orange) for all 82 North American focal species (arranged alphabetically by common name). To facilitate visualization of non-zero changes in relationship, plots are only included for interaction coefficients with 95% credible intervals not containing zero and are arranged as follows: (top right) overlap between peak migration and peak travel reductions, (center left) percent change in human mobility during pandemic, (center right) urban versus rural habitat, (bottom left) distance to airport, and (bottom right) distance to major road. Changes to human activity during the pandemic increase from left to right on each panel.

# American Coot

*Fulica americana*

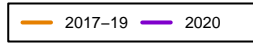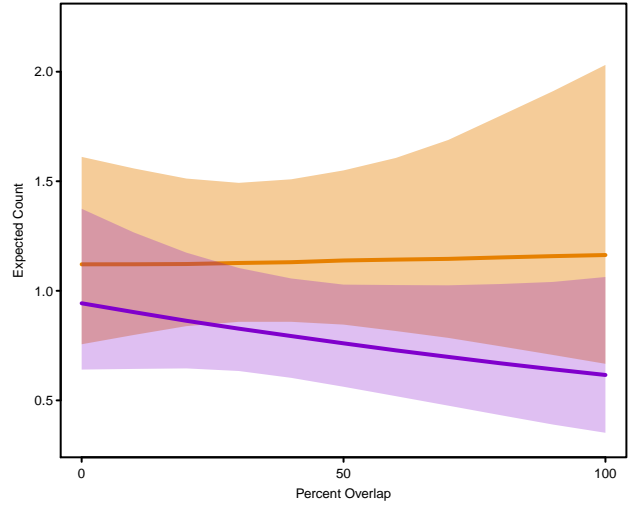

posterior distribution 95% CI  
for interaction with  
\*delta\_traf\* includes zero

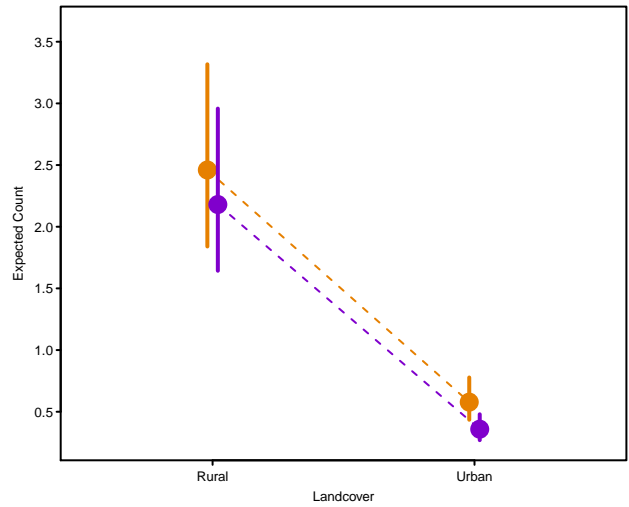

posterior distribution 95% CI  
for interaction with  
\*air\* includes zero

posterior distribution 95% CI  
for interaction with  
\*road\* includes zero

# American Crow

*Corvus brachyrhynchos*

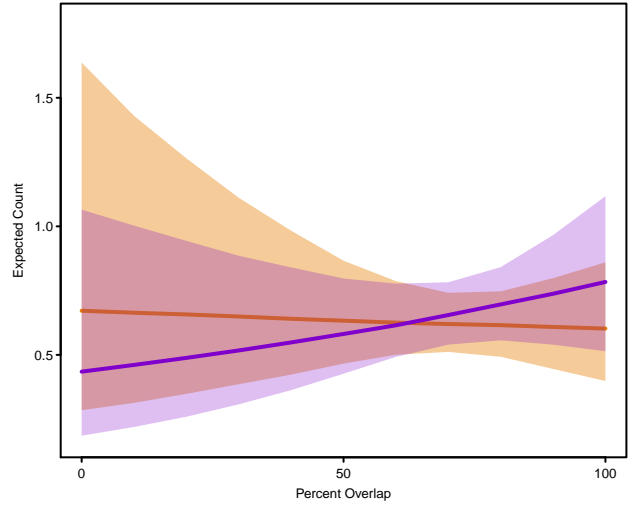

posterior distribution 95% CI  
for interaction with  
\*delta\_traf\* includes zero

posterior distribution 95% CI  
for interaction with  
\*land\* includes zero

posterior distribution 95% CI  
for interaction with  
\*air\* includes zero

posterior distribution 95% CI  
for interaction with  
\*road\* includes zero

# American Goldfinch

*Spinus tristis*

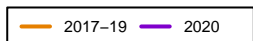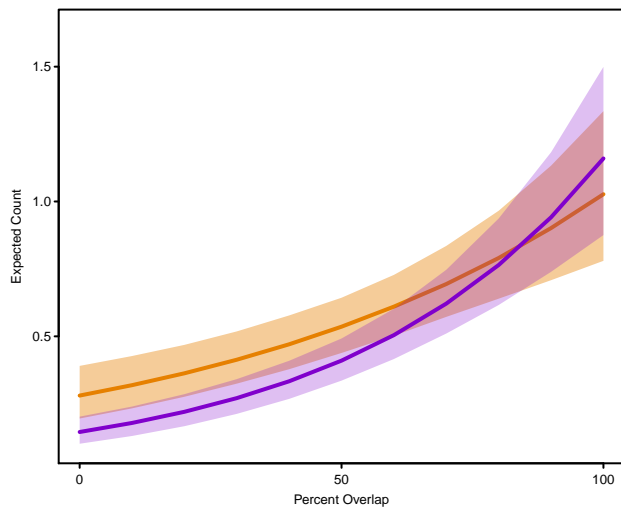

posterior distribution 95% CI  
for interaction with  
\*delta\_traf\* includes zero

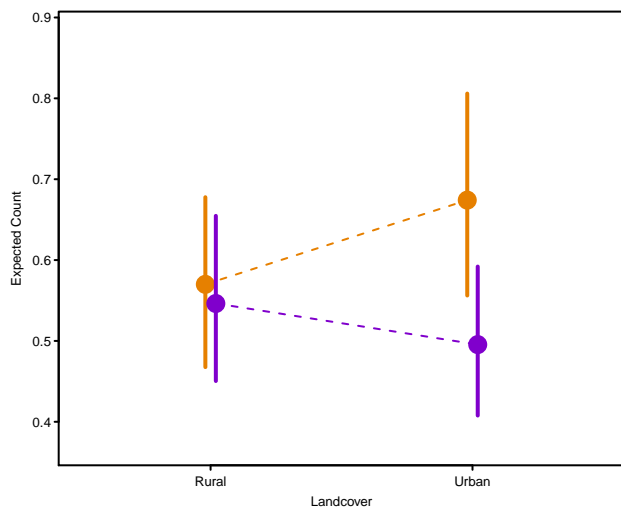

posterior distribution 95% CI  
for interaction with  
\*air\* includes zero

posterior distribution 95% CI  
for interaction with  
\*road\* includes zero

# American Redstart

*Setophaga ruticilla*

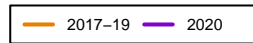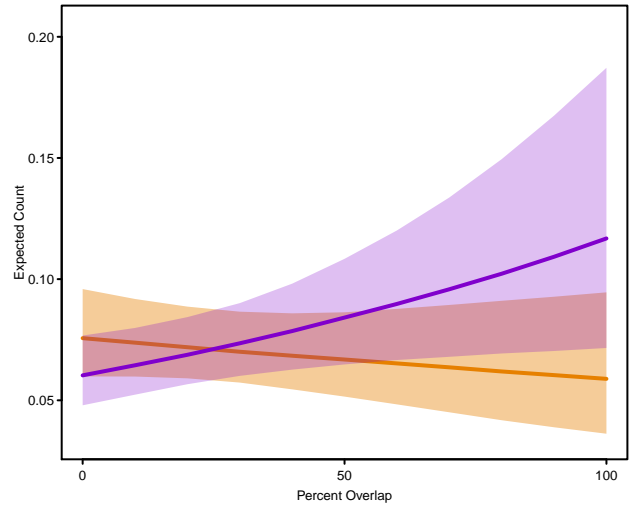

posterior distribution 95% CI  
for interaction with  
\*delta\_traf\* includes zero

posterior distribution 95% CI  
for interaction with  
\*land\* includes zero

posterior distribution 95% CI  
for interaction with  
\*air\* includes zero

posterior distribution 95% CI  
for interaction with  
\*road\* includes zero

# American Robin

*Turdus migratorius*

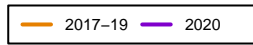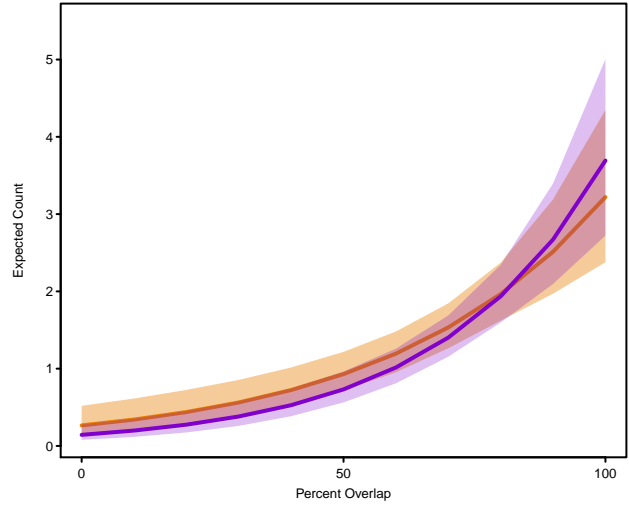

posterior distribution 95% CI  
for interaction with  
\*delta\_traf\* includes zero

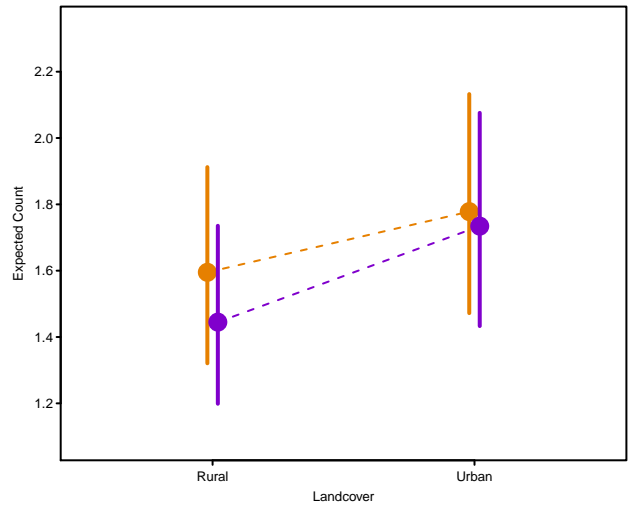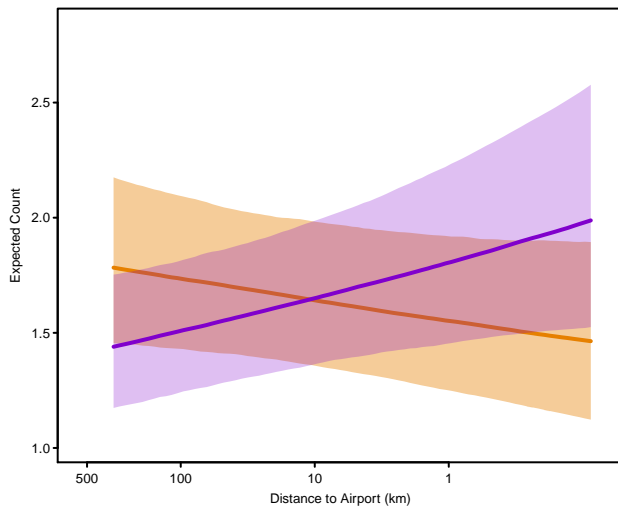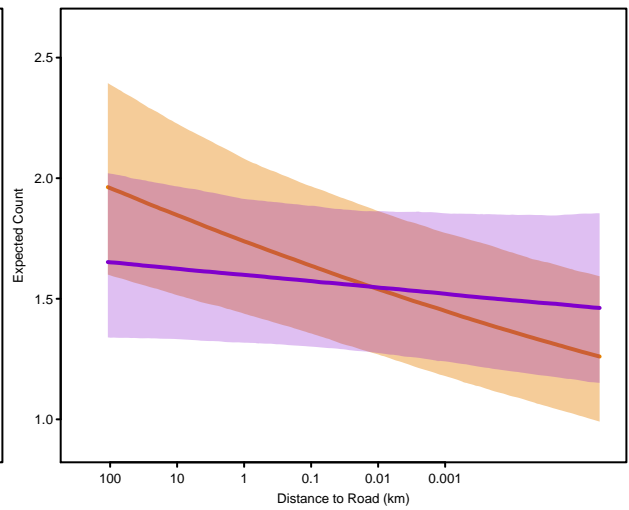

# Bald Eagle

*Haliaeetus leucocephalus*

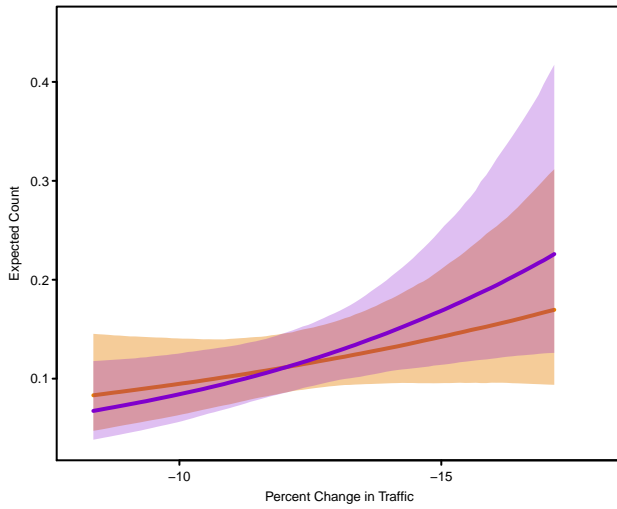

posterior distribution 95% CI  
for interaction with  
\*overlap\* includes zero

posterior distribution 95% CI  
for interaction with  
\*land\* includes zero

posterior distribution 95% CI  
for interaction with  
\*air\* includes zero

posterior distribution 95% CI  
for interaction with  
\*road\* includes zero



## Baltimore Oriole

*Icterus galbula*

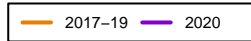

posterior distribution 95% CI  
for interaction with  
\*overlap\* includes zero

posterior distribution 95% CI  
for interaction with  
\*delta\_traf\* includes zero

posterior distribution 95% CI  
for interaction with  
\*land\* includes zero

posterior distribution 95% CI  
for interaction with  
\*air\* includes zero

posterior distribution 95% CI  
for interaction with  
\*road\* includes zero

# Barn Swallow

*Hirundo rustica*

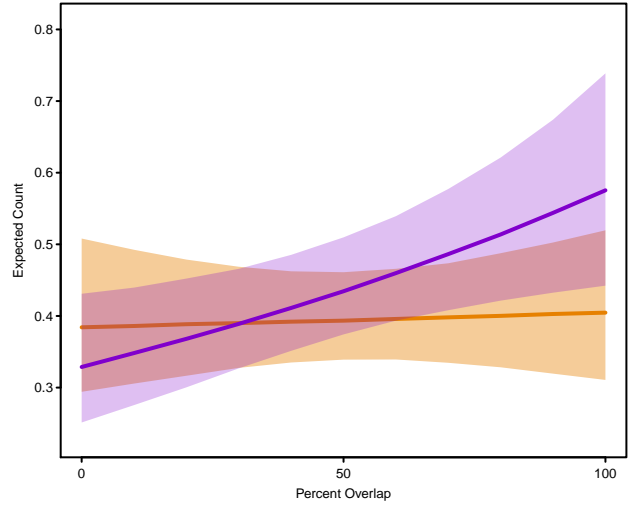

posterior distribution 95% CI  
for interaction with  
\*delta\_traf\* includes zero

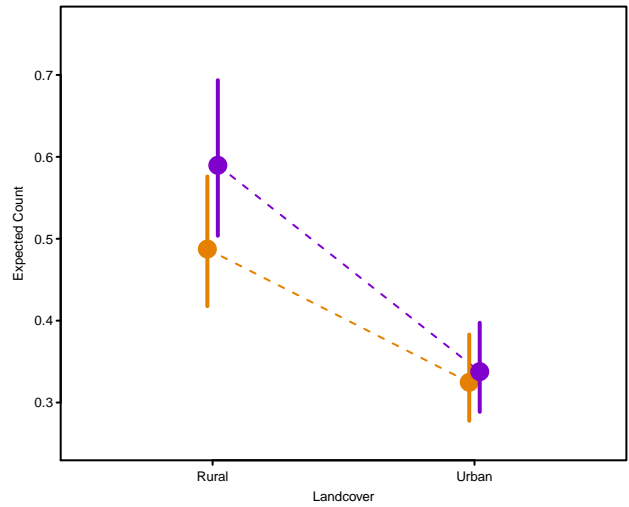

posterior distribution 95% CI  
for interaction with  
\*air\* includes zero

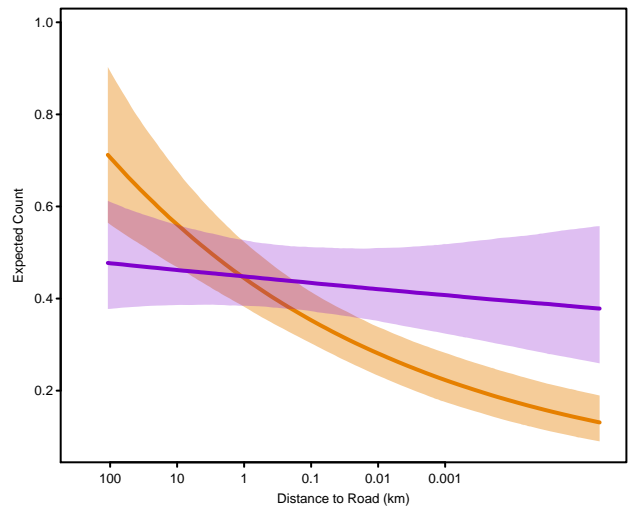

# Belted Kingfisher

*Megaceryle alcyon*

— 2017-19 — 2020

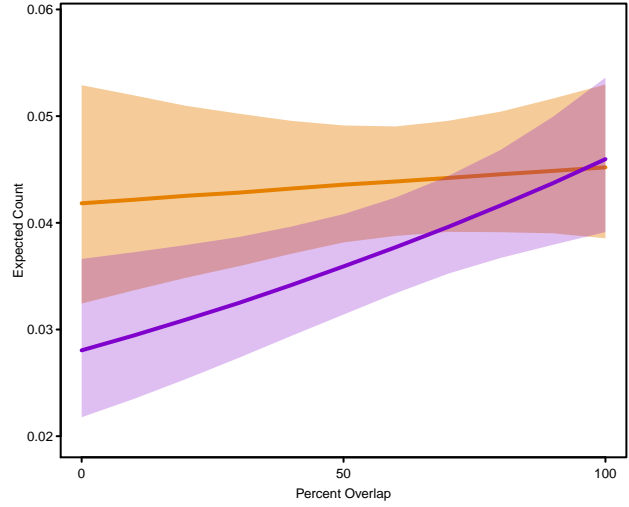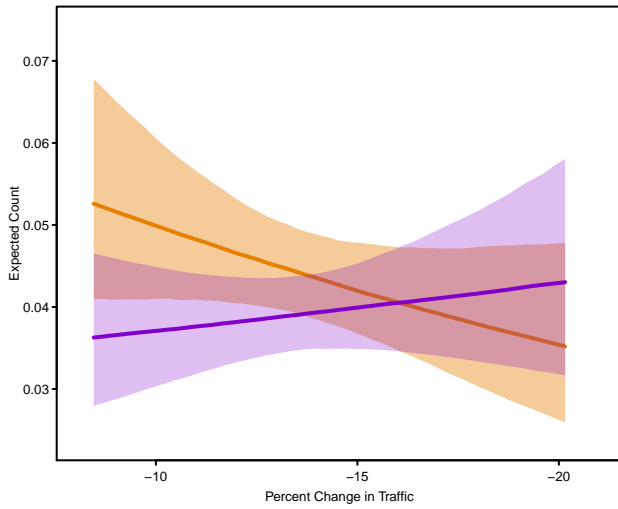

posterior distribution 95% CI  
for interaction with  
\*land\* includes zero

posterior distribution 95% CI  
for interaction with  
\*air\* includes zero

posterior distribution 95% CI  
for interaction with  
\*road\* includes zero

# Black-and-white Warbler

*Mniotilta varia*

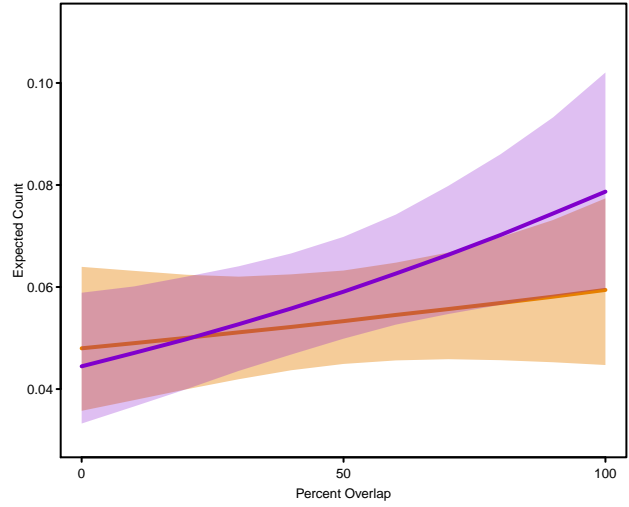

posterior distribution 95% CI  
for interaction with  
\*delta\_traf\* includes zero

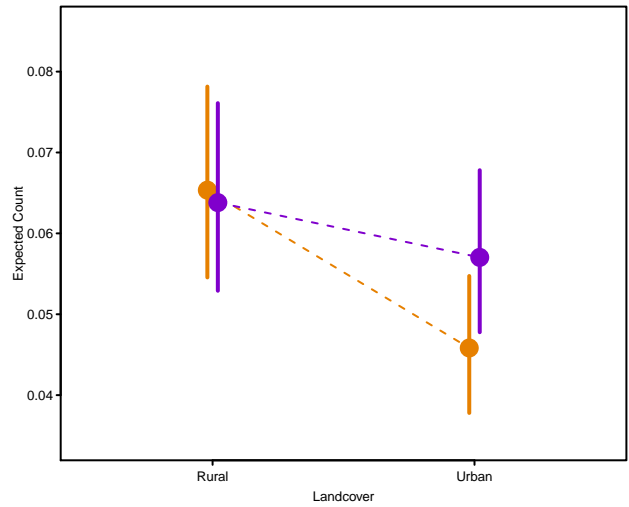

posterior distribution 95% CI  
for interaction with  
\*air\* includes zero

posterior distribution 95% CI  
for interaction with  
\*road\* includes zero

# Black-capped Chickadee

*Poecile atricapillus*

2017-19 2020

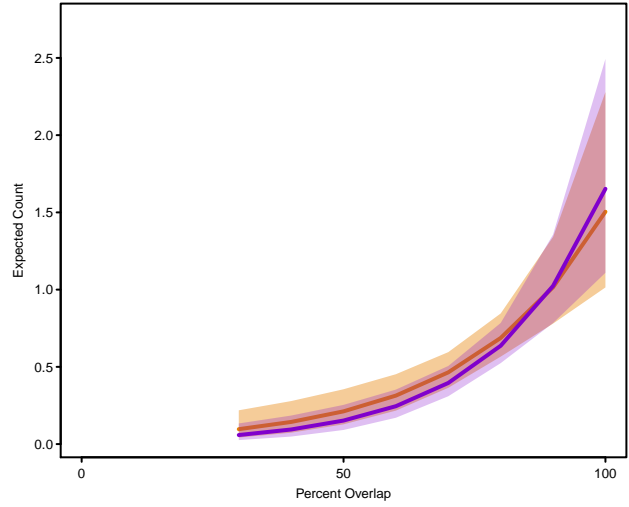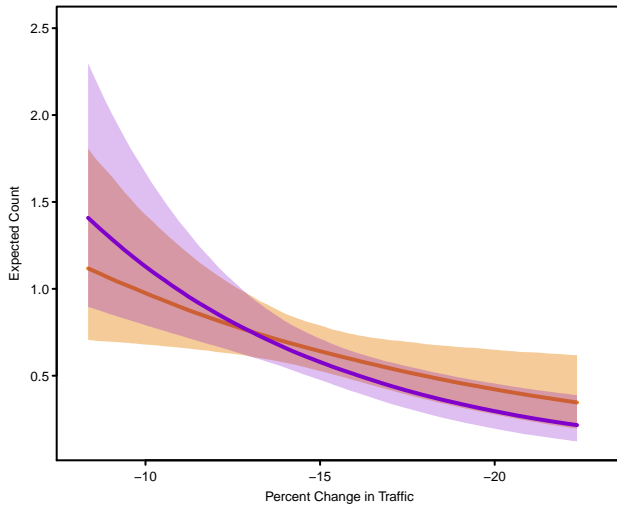

posterior distribution 95% CI  
for interaction with  
\*land\* includes zero

posterior distribution 95% CI  
for interaction with  
\*air\* includes zero

posterior distribution 95% CI  
for interaction with  
\*road\* includes zero

# Blue-gray Gnatcatcher

*Polioptila caerulea*

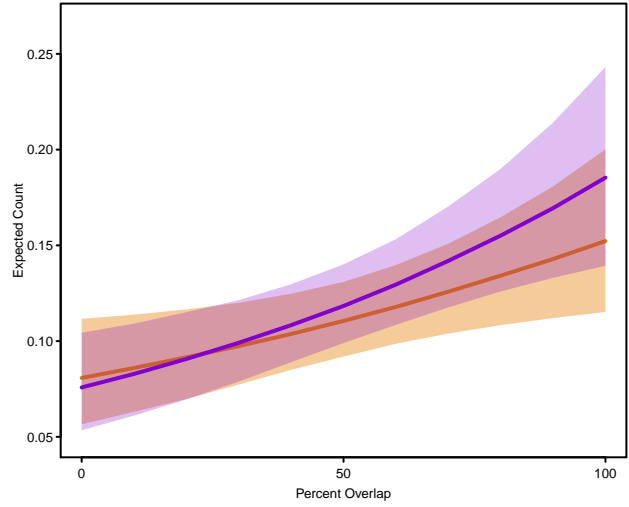

posterior distribution 95% CI  
for interaction with  
\*delta\_traf\* includes zero

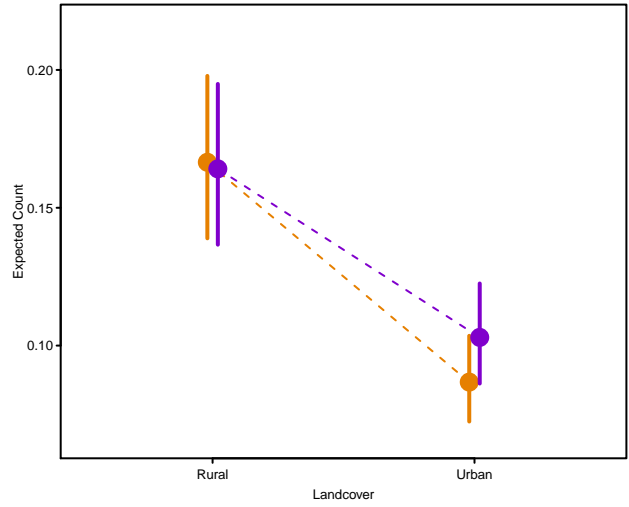

posterior distribution 95% CI  
for interaction with  
\*air\* includes zero

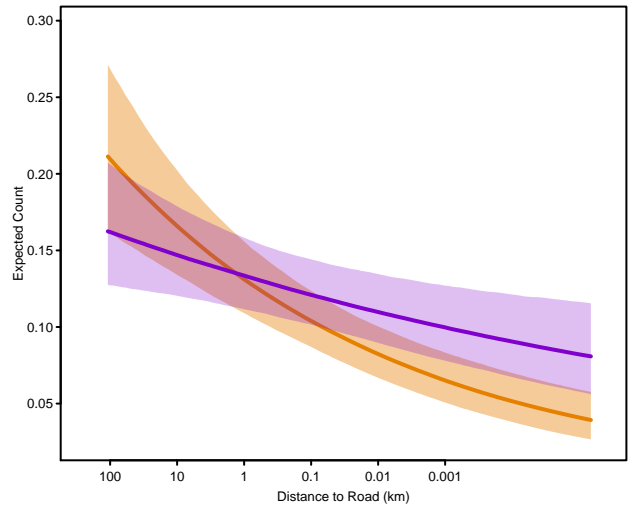

# Blue-winged Teal

*Spatula discors*

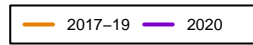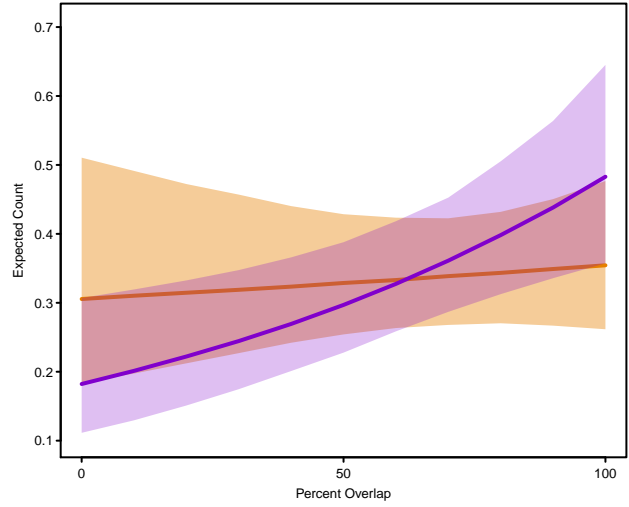

posterior distribution 95% CI  
for interaction with  
\*delta\_traf\* includes zero

posterior distribution 95% CI  
for interaction with  
\*land\* includes zero

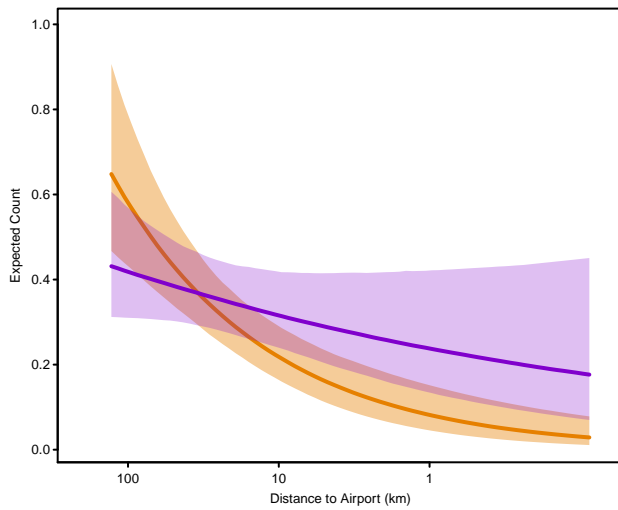

posterior distribution 95% CI  
for interaction with  
\*road\* includes zero

# Blue Jay

*Cyanocitta cristata*

posterior distribution 95% CI  
for interaction with  
\*overlap\* includes zero

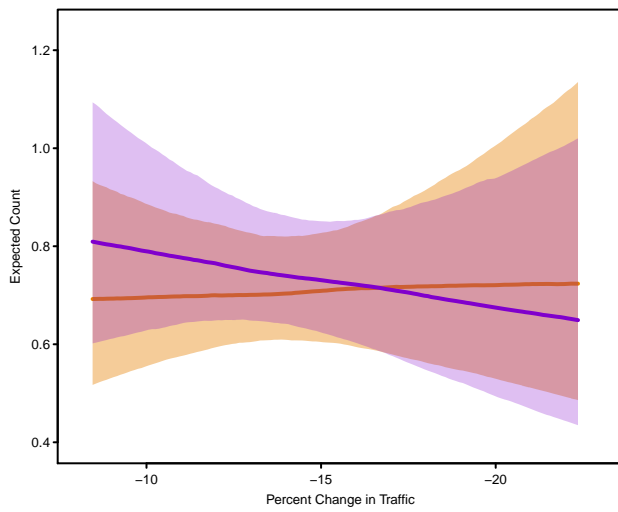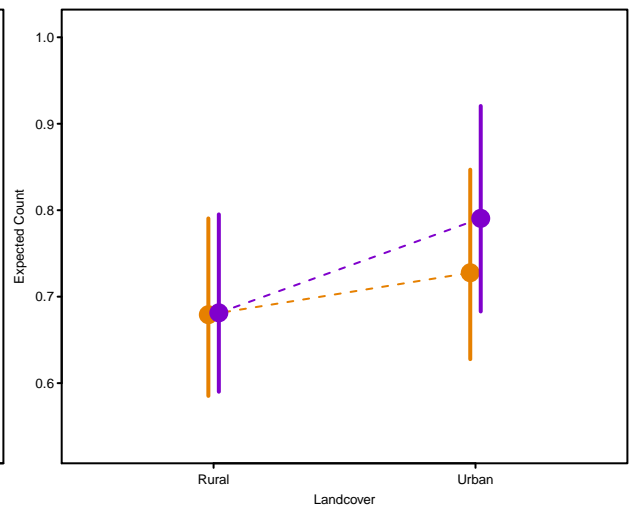

posterior distribution 95% CI  
for interaction with  
\*air\* includes zero

posterior distribution 95% CI  
for interaction with  
\*road\* includes zero



# Brown-headed Cowbird

*Molothrus ater*

2017-19 2020

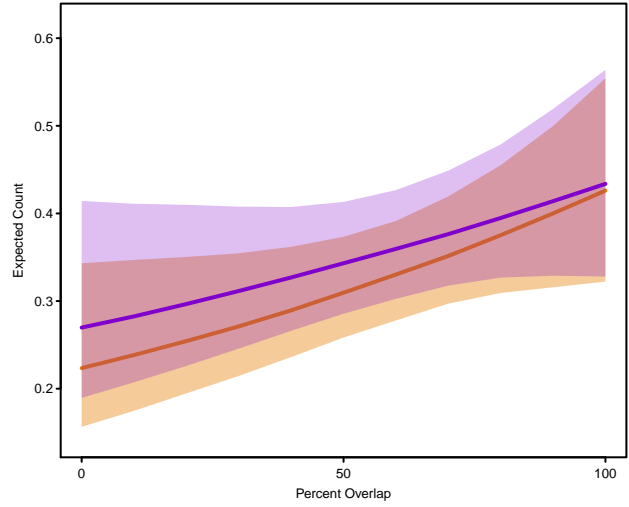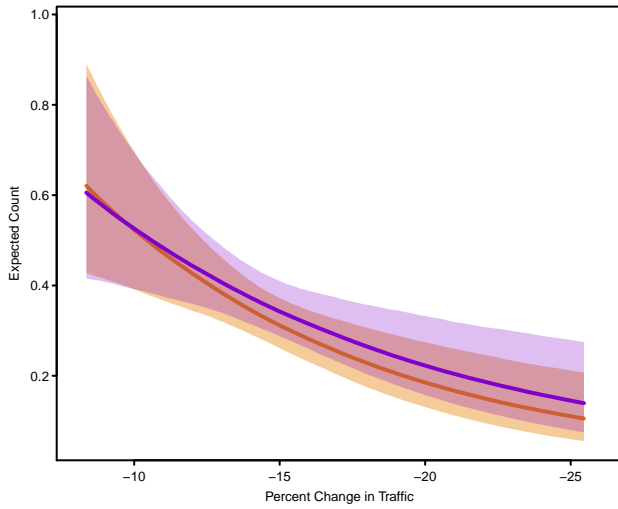

posterior distribution 95% CI  
for interaction with  
\*land\* includes zero

posterior distribution 95% CI  
for interaction with  
\*air\* includes zero

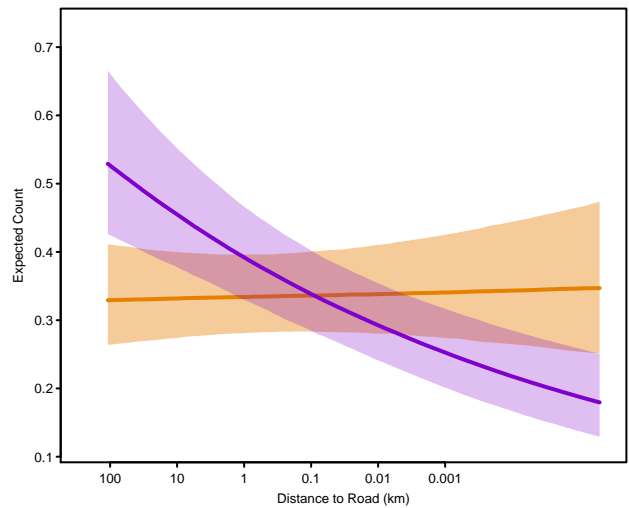

# Brown Thrasher

*Toxostoma rufum*

posterior distribution 95% CI  
for interaction with  
\*overlap\* includes zero

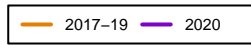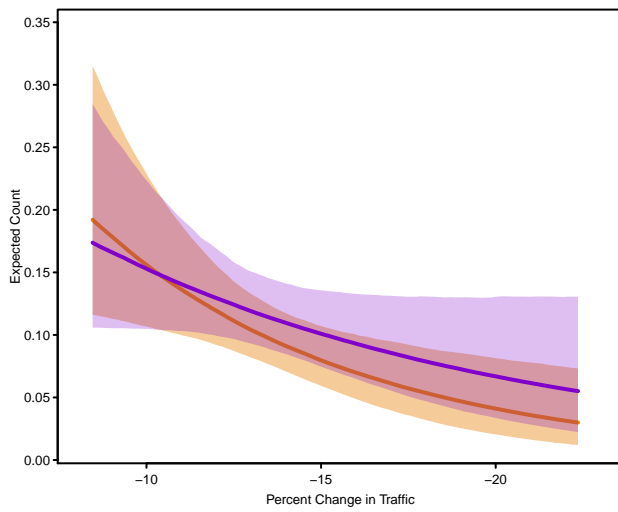

posterior distribution 95% CI  
for interaction with  
\*land\* includes zero

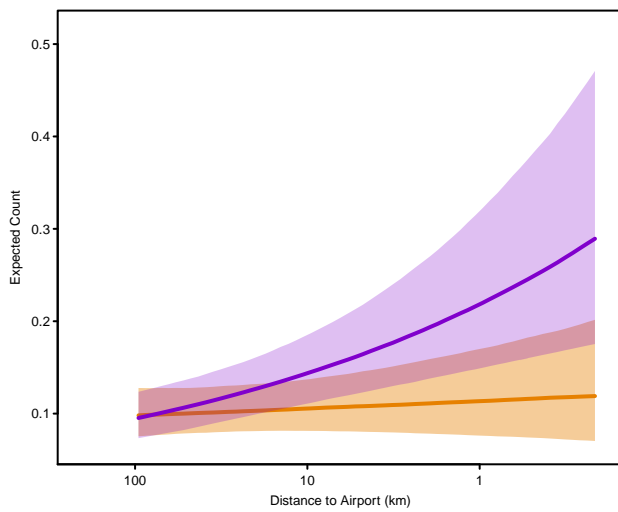

posterior distribution 95% CI  
for interaction with  
\*road\* includes zero

# Bufflehead

*Bucephala albeola*

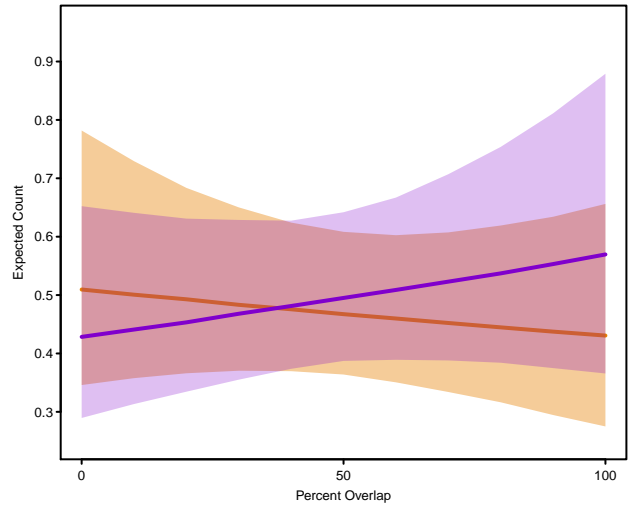

posterior distribution 95% CI  
for interaction with  
\*delta\_traf\* includes zero

posterior distribution 95% CI  
for interaction with  
\*land\* includes zero

posterior distribution 95% CI  
for interaction with  
\*air\* includes zero

posterior distribution 95% CI  
for interaction with  
\*road\* includes zero

# Canada Goose

*Branta canadensis*

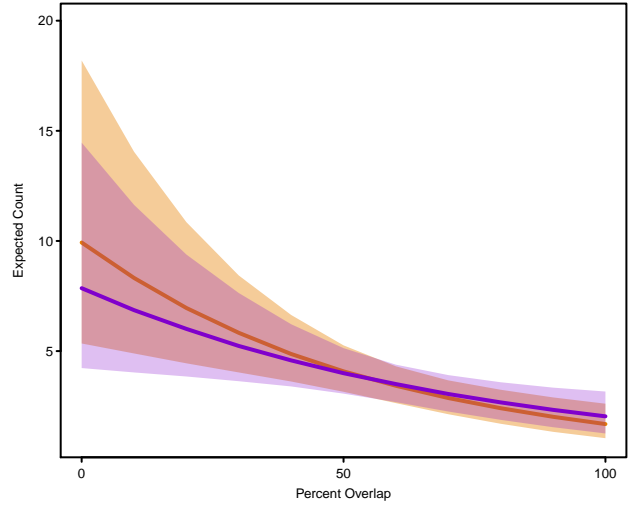

posterior distribution 95% CI  
for interaction with  
\*delta\_traf\* includes zero

posterior distribution 95% CI  
for interaction with  
\*land\* includes zero

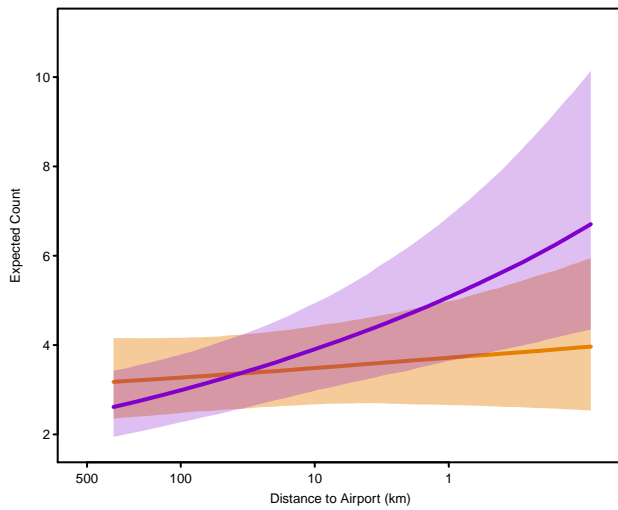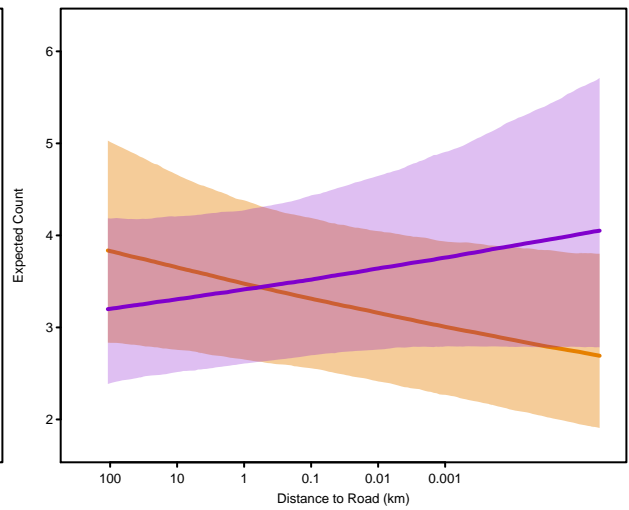

# Carolina Wren

*Thryothorus ludovicianus*

posterior distribution 95% CI  
for interaction with  
\*overlap\* includes zero

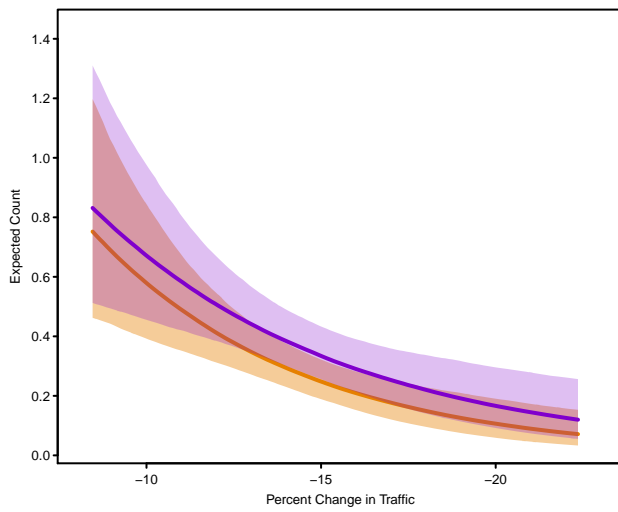

posterior distribution 95% CI  
for interaction with  
\*land\* includes zero

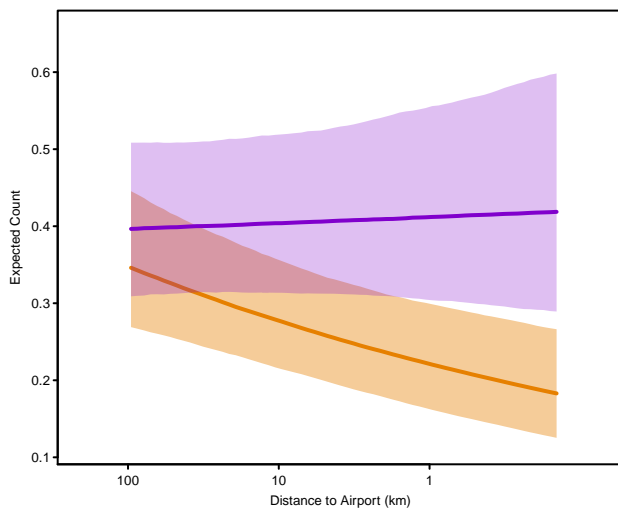

posterior distribution 95% CI  
for interaction with  
\*road\* includes zero

# Cedar Waxwing

*Bombycilla cedrorum*



posterior distribution 95% CI  
for interaction with  
\*overlap\* includes zero

posterior distribution 95% CI  
for interaction with  
\*delta\_traf\* includes zero

posterior distribution 95% CI  
for interaction with  
\*land\* includes zero

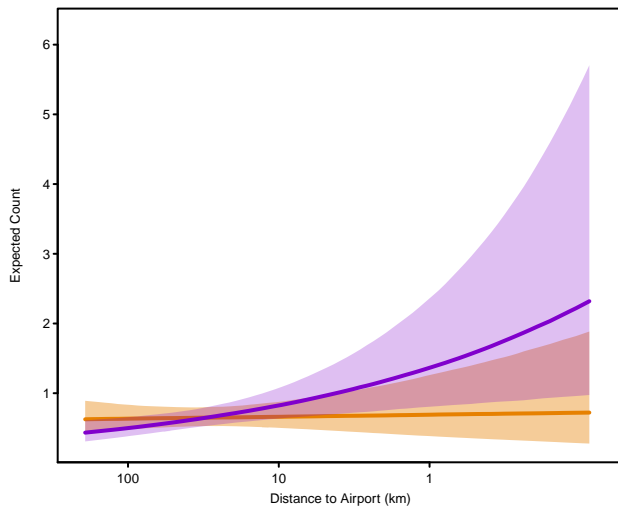

posterior distribution 95% CI  
for interaction with  
\*road\* includes zero

# Chimney Swift

*Chaetura pelagica*

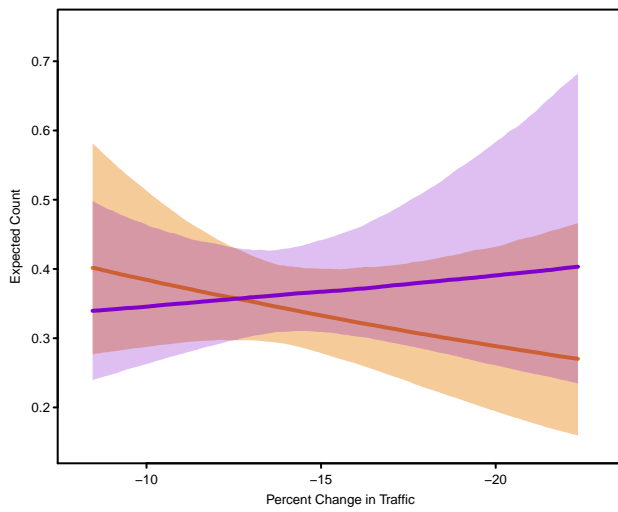

posterior distribution 95% CI  
for interaction with  
\*overlap\* includes zero

posterior distribution 95% CI  
for interaction with  
\*land\* includes zero

posterior distribution 95% CI  
for interaction with  
\*air\* includes zero

posterior distribution 95% CI  
for interaction with  
\*road\* includes zero

# Chipping Sparrow

*Spizella passerina*



posterior distribution 95% CI  
for interaction with  
\*overlap\* includes zero

posterior distribution 95% CI  
for interaction with  
\*delta\_traf\* includes zero

posterior distribution 95% CI  
for interaction with  
\*land\* includes zero

posterior distribution 95% CI  
for interaction with  
\*air\* includes zero

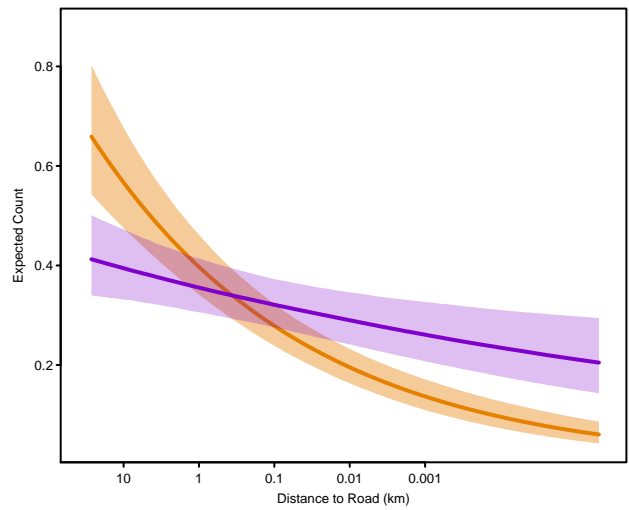



# Common Grackle

*Quiscalus quiscula*

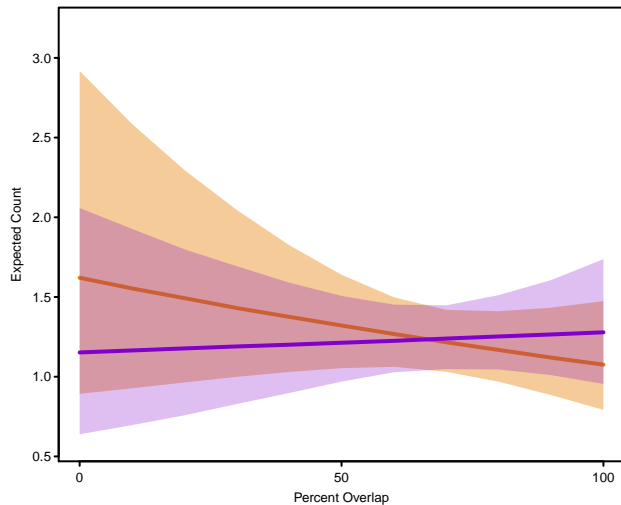

posterior distribution 95% CI  
for interaction with  
\*delta\_traf\* includes zero

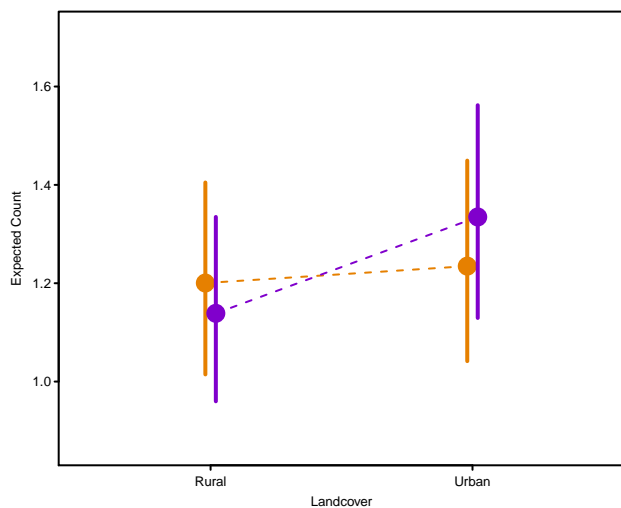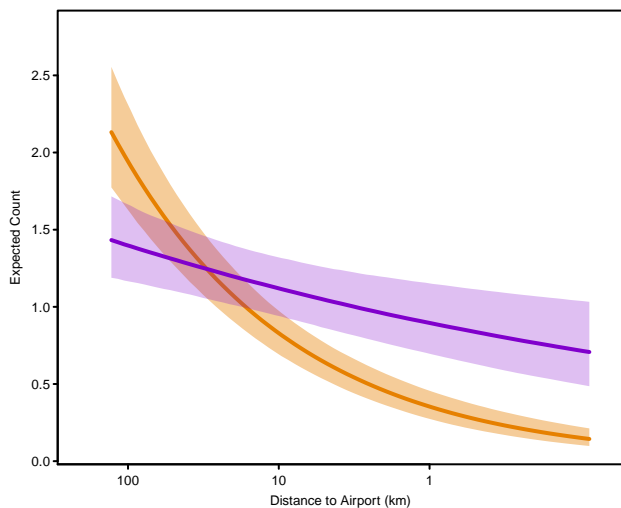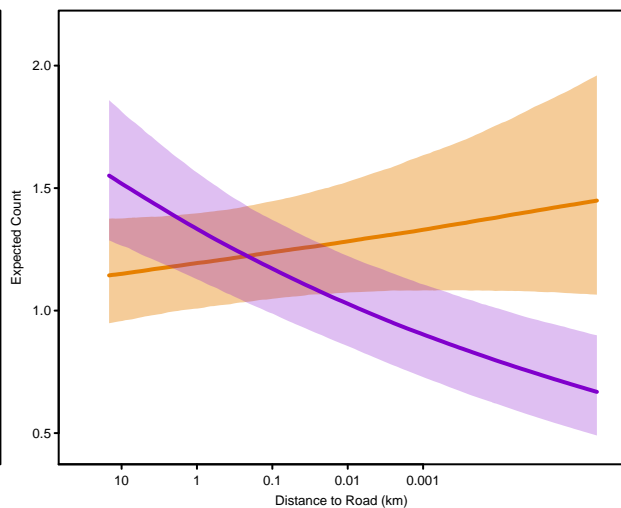

# Common Yellowthroat

*Geothlypis trichas*

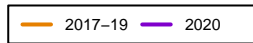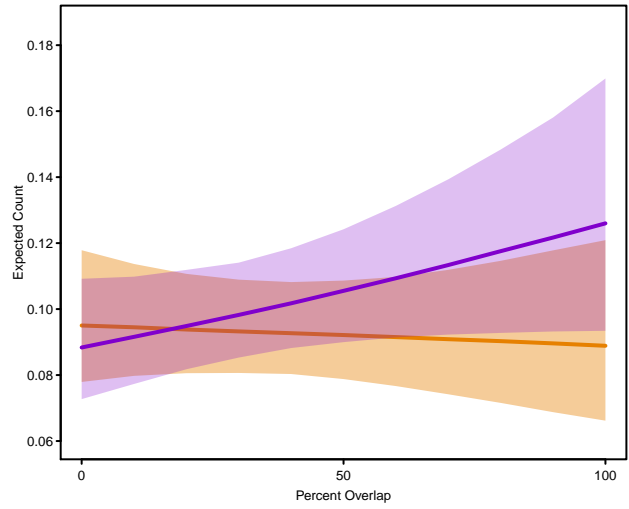

posterior distribution 95% CI  
for interaction with  
\*delta\_traf\* includes zero

posterior distribution 95% CI  
for interaction with  
\*land\* includes zero

posterior distribution 95% CI  
for interaction with  
\*air\* includes zero

posterior distribution 95% CI  
for interaction with  
\*road\* includes zero

# Cooper's Hawk

*Accipiter cooperii*

posterior distribution 95% CI  
for interaction with  
\*overlap\* includes zero



posterior distribution 95% CI  
for interaction with  
\*delta\_traf\* includes zero

posterior distribution 95% CI  
for interaction with  
\*land\* includes zero

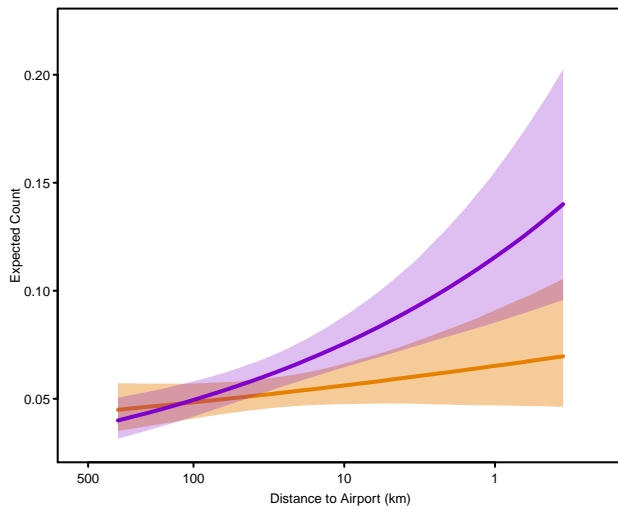

posterior distribution 95% CI  
for interaction with  
\*road\* includes zero

# Dark-eyed Junco

*Junco hyemalis*

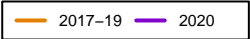

posterior distribution 95% CI  
for interaction with  
\*overlap\* includes zero

posterior distribution 95% CI  
for interaction with  
\*delta\_traf\* includes zero

posterior distribution 95% CI  
for interaction with  
\*land\* includes zero

posterior distribution 95% CI  
for interaction with  
\*air\* includes zero

posterior distribution 95% CI  
for interaction with  
\*road\* includes zero

# Double-crested Cormorant

*Phalacrocorax auritus*



posterior distribution 95% CI  
for interaction with  
\*delta\_traf\* includes zero

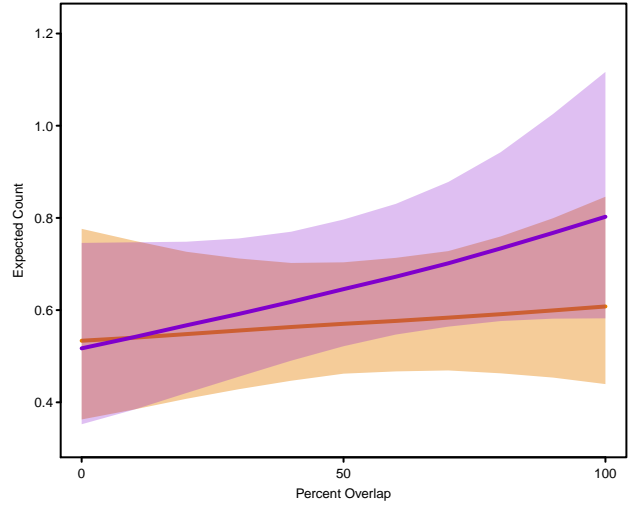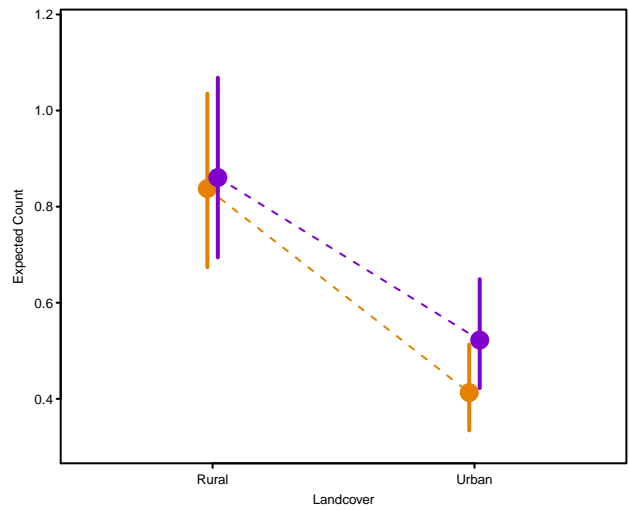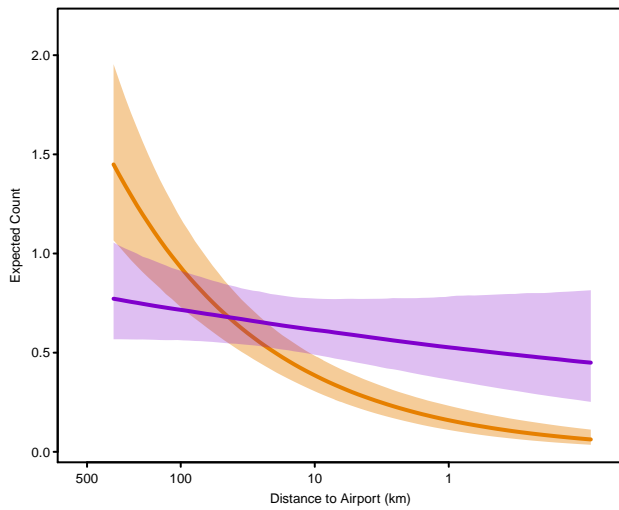

posterior distribution 95% CI  
for interaction with  
\*road\* includes zero

# Downy Woodpecker

*Dryobates pubescens*

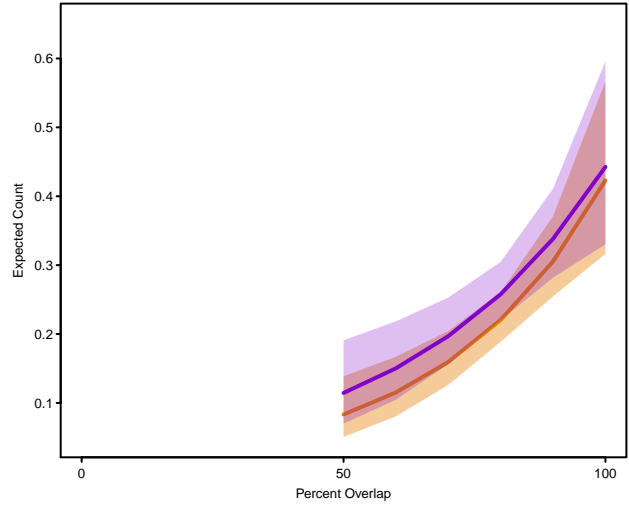

posterior distribution 95% CI  
for interaction with  
\*delta\_traf\* includes zero

posterior distribution 95% CI  
for interaction with  
\*land\* includes zero

posterior distribution 95% CI  
for interaction with  
\*air\* includes zero

posterior distribution 95% CI  
for interaction with  
\*road\* includes zero

## Eastern Bluebird

*Sialia sialis*



posterior distribution 95% CI  
for interaction with  
\*overlap\* includes zero

posterior distribution 95% CI  
for interaction with  
\*delta\_traf\* includes zero

posterior distribution 95% CI  
for interaction with  
\*land\* includes zero

posterior distribution 95% CI  
for interaction with  
\*air\* includes zero

posterior distribution 95% CI  
for interaction with  
\*road\* includes zero

# Eastern Kingbird

*Tyrannus tyrannus*



posterior distribution 95% CI  
for interaction with  
\*overlap\* includes zero

posterior distribution 95% CI  
for interaction with  
\*delta\_traf\* includes zero

posterior distribution 95% CI  
for interaction with  
\*land\* includes zero

posterior distribution 95% CI  
for interaction with  
\*air\* includes zero

posterior distribution 95% CI  
for interaction with  
\*road\* includes zero



# Eastern Phoebe

*Sayornis phoebe*



posterior distribution 95% CI  
for interaction with  
\*delta\_traf\* includes zero

posterior distribution 95% CI  
for interaction with  
\*air\* includes zero

posterior distribution 95% CI  
for interaction with  
\*overlap\* includes zero

posterior distribution 95% CI  
for interaction with  
\*road\* includes zero

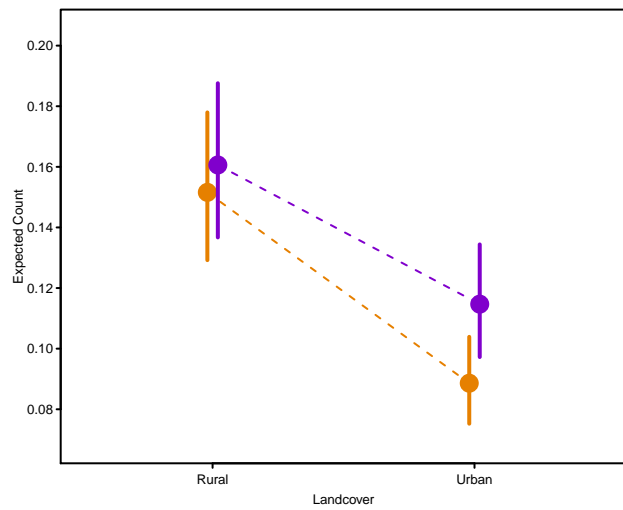

# Eastern Towhee

*Pipilo erythrophthalmus*

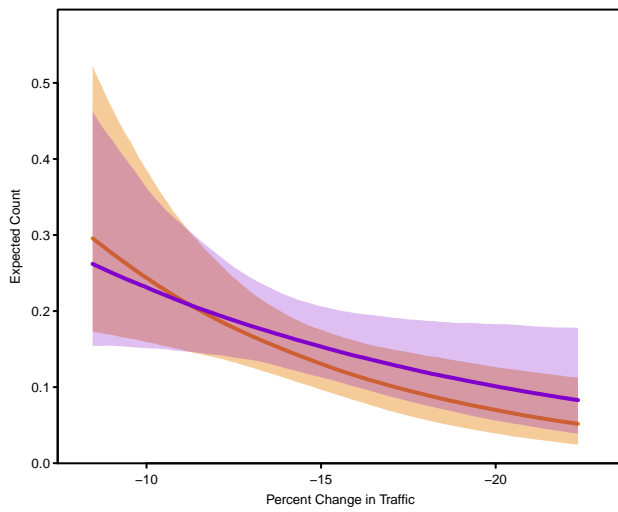

posterior distribution 95% CI  
for interaction with  
\*overlap\* includes zero

posterior distribution 95% CI  
for interaction with  
\*land\* includes zero

posterior distribution 95% CI  
for interaction with  
\*air\* includes zero

posterior distribution 95% CI  
for interaction with  
\*road\* includes zero

## Eurasian Collared-Dove

*Streptopelia decaocto*



posterior distribution 95% CI  
for interaction with  
\*overlap\* includes zero

posterior distribution 95% CI  
for interaction with  
\*delta\_traf\* includes zero

posterior distribution 95% CI  
for interaction with  
\*land\* includes zero

posterior distribution 95% CI  
for interaction with  
\*air\* includes zero

posterior distribution 95% CI  
for interaction with  
\*road\* includes zero

# European Starling

*Sturnus vulgaris*

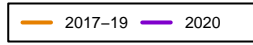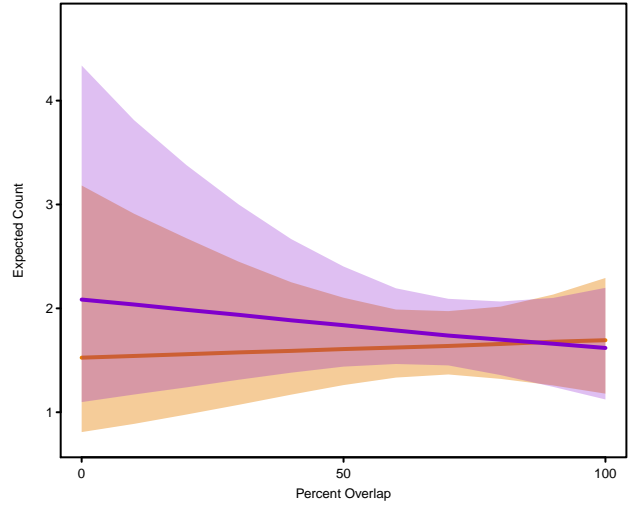

posterior distribution 95% CI  
for interaction with  
\*delta\_traf\* includes zero

posterior distribution 95% CI  
for interaction with  
\*land\* includes zero

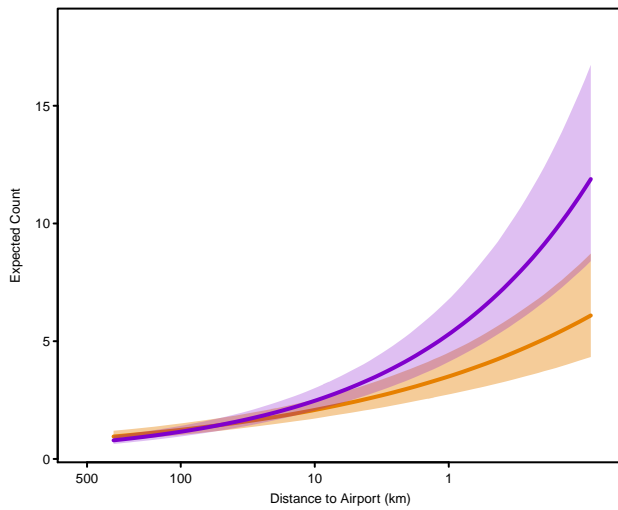

posterior distribution 95% CI  
for interaction with  
\*road\* includes zero

# Gadwall

*Mareca strepera*



posterior distribution 95% CI  
for interaction with  
\*overlap\* includes zero

posterior distribution 95% CI  
for interaction with  
\*delta\_traf\* includes zero

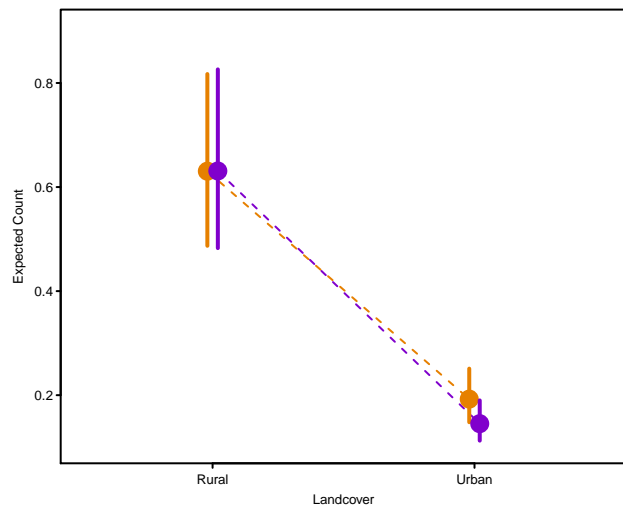

posterior distribution 95% CI  
for interaction with  
\*air\* includes zero

posterior distribution 95% CI  
for interaction with  
\*road\* includes zero

# Gray Catbird

*Dumetella carolinensis*

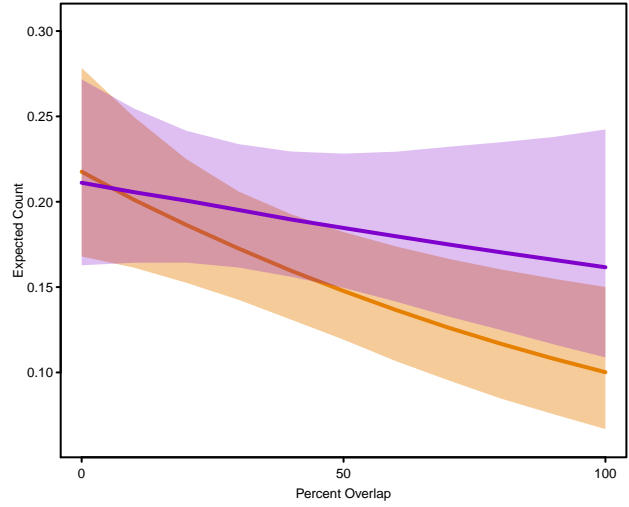

posterior distribution 95% CI  
for interaction with  
\*delta\_traf\* includes zero

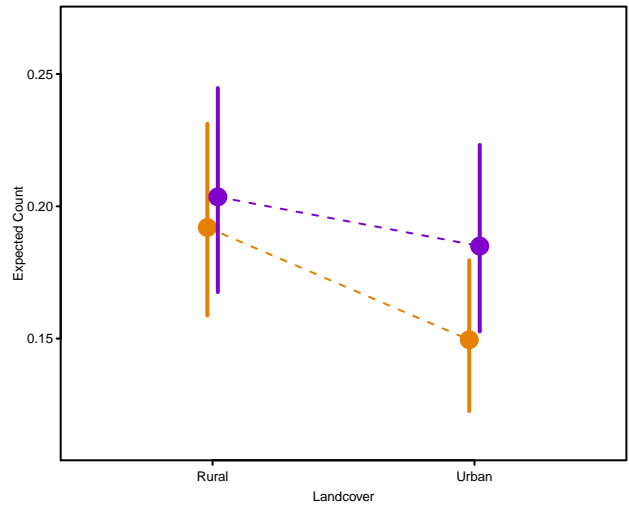

posterior distribution 95% CI  
for interaction with  
\*air\* includes zero

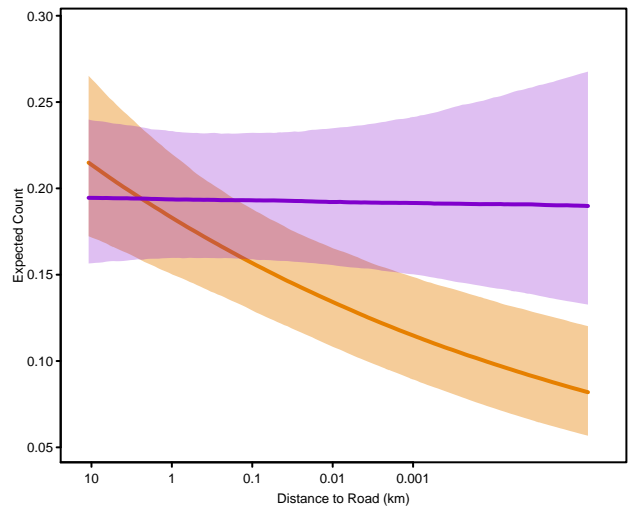

# Great Blue Heron

*Ardea herodias*

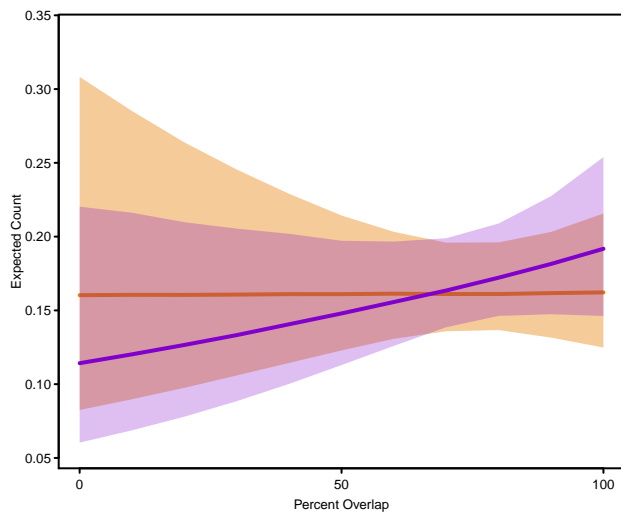

posterior distribution 95% CI  
for interaction with  
\*delta\_traf\* includes zero

posterior distribution 95% CI  
for interaction with  
\*land\* includes zero

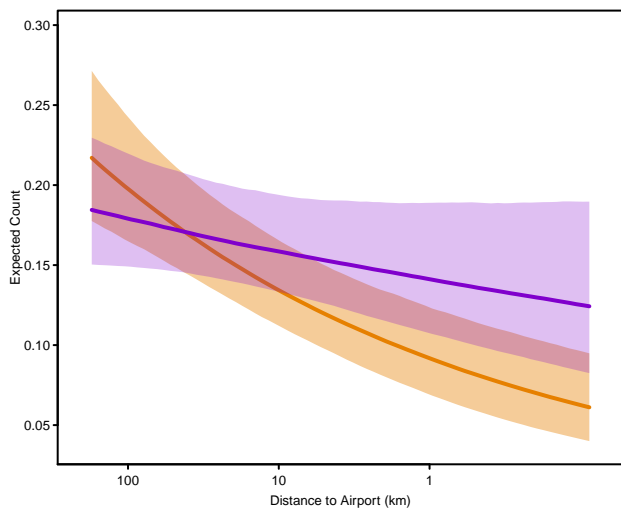

posterior distribution 95% CI  
for interaction with  
\*road\* includes zero

# Great Crested Flycatcher

*Myiarchus crinitus*



posterior distribution 95% CI  
for interaction with  
\*delta\_traf\* includes zero

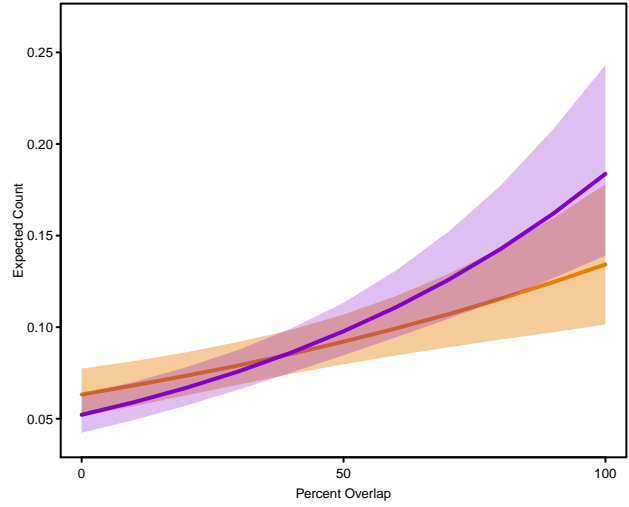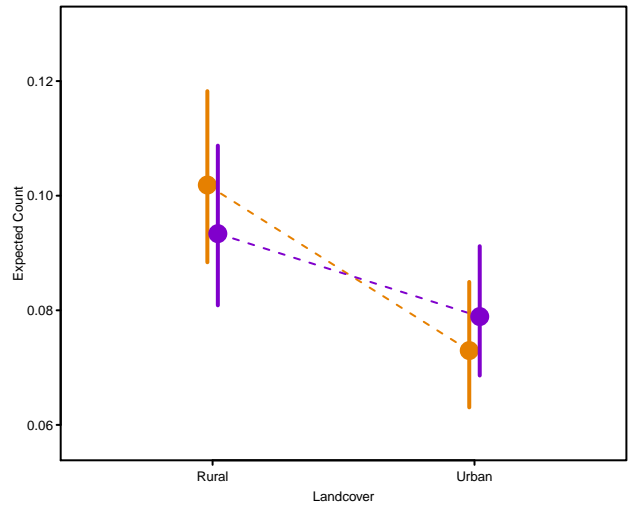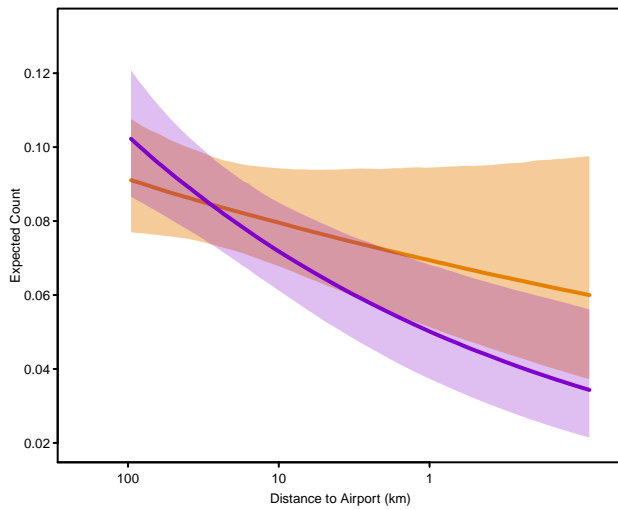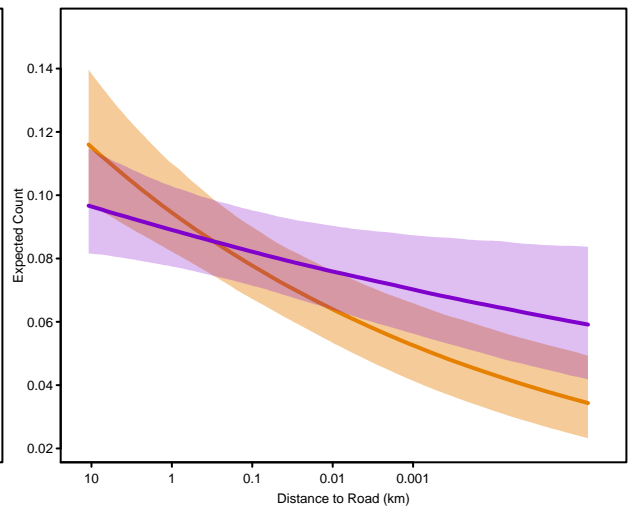



# Great Egret

*Ardea alba*



posterior distribution 95% CI  
for interaction with  
\*overlap\* includes zero

posterior distribution 95% CI  
for interaction with  
\*delta\_traf\* includes zero

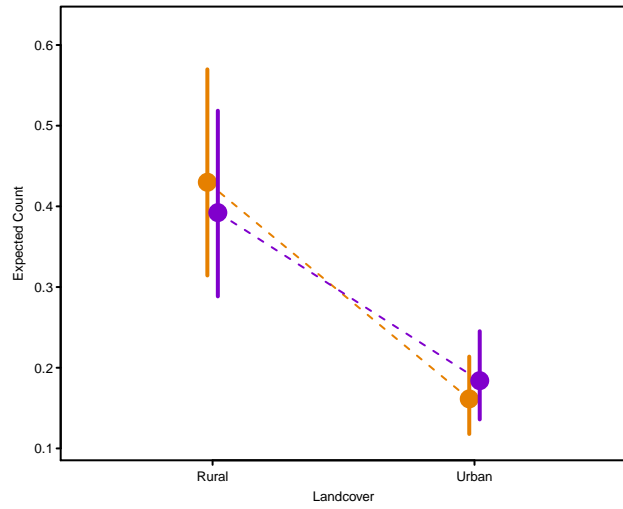

posterior distribution 95% CI  
for interaction with  
\*air\* includes zero

posterior distribution 95% CI  
for interaction with  
\*road\* includes zero

# Hairy Woodpecker

*Dryobates villosus*



posterior distribution 95% CI  
for interaction with  
\*overlap\* includes zero

posterior distribution 95% CI  
for interaction with  
\*delta\_traf\* includes zero

posterior distribution 95% CI  
for interaction with  
\*land\* includes zero

posterior distribution 95% CI  
for interaction with  
\*air\* includes zero

posterior distribution 95% CI  
for interaction with  
\*road\* includes zero

# House Finch

*Haemorhous mexicanus*

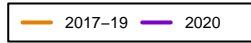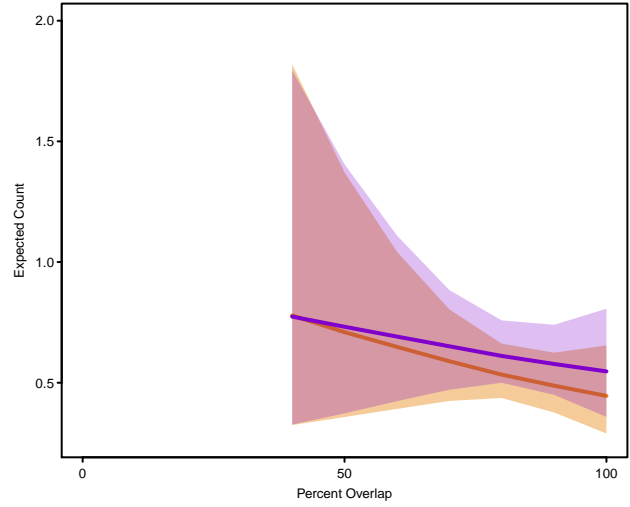

posterior distribution 95% CI  
for interaction with  
\*delta\_traf\* includes zero

posterior distribution 95% CI  
for interaction with  
\*land\* includes zero

posterior distribution 95% CI  
for interaction with  
\*air\* includes zero

posterior distribution 95% CI  
for interaction with  
\*road\* includes zero

# House Sparrow

*Passer domesticus*

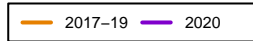

posterior distribution 95% CI  
for interaction with  
\*overlap\* includes zero

posterior distribution 95% CI  
for interaction with  
\*delta\_traf\* includes zero

posterior distribution 95% CI  
for interaction with  
\*land\* includes zero

posterior distribution 95% CI  
for interaction with  
\*air\* includes zero

posterior distribution 95% CI  
for interaction with  
\*road\* includes zero

# House Wren

*Troglodytes aedon*

posterior distribution 95% CI  
for interaction with  
\*overlap\* includes zero



posterior distribution 95% CI  
for interaction with  
\*delta\_traf\* includes zero

posterior distribution 95% CI  
for interaction with  
\*land\* includes zero

posterior distribution 95% CI  
for interaction with  
\*air\* includes zero

posterior distribution 95% CI  
for interaction with  
\*road\* includes zero

# Indigo Bunting

*Passerina cyanea*

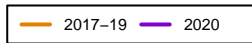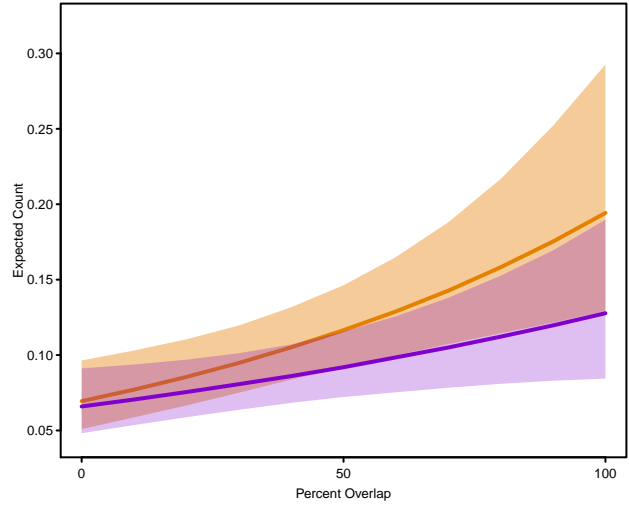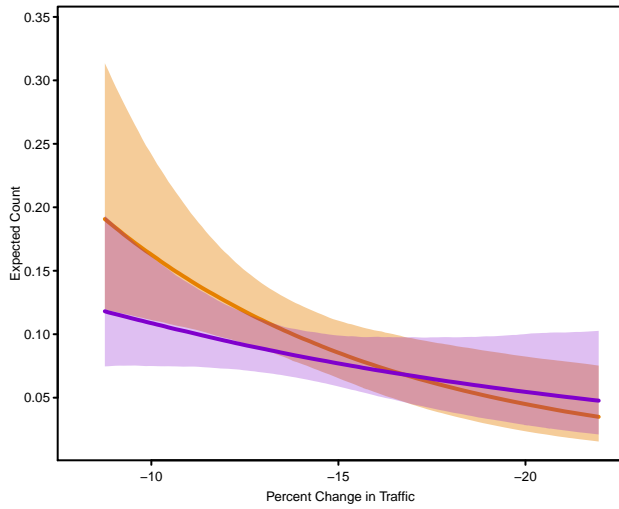

posterior distribution 95% CI  
for interaction with  
\*land\* includes zero

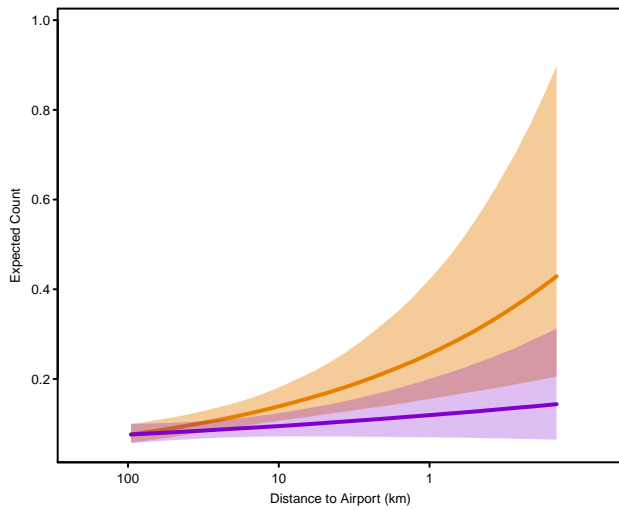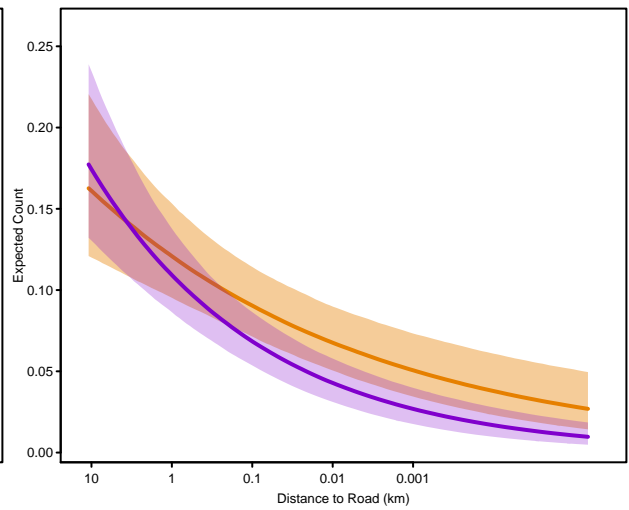

# Killdeer

*Charadrius vociferus*

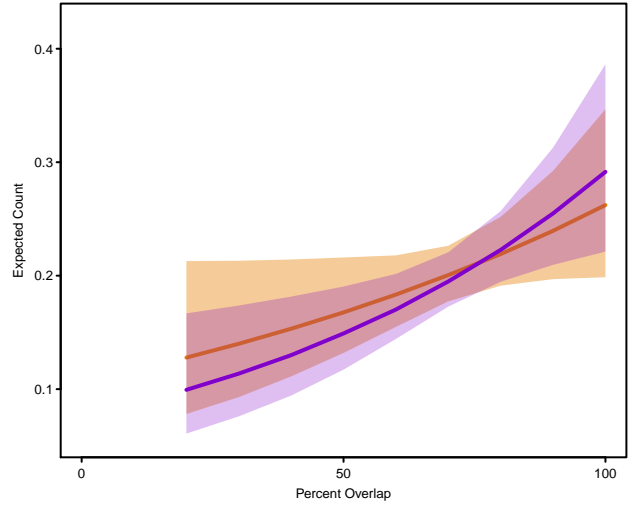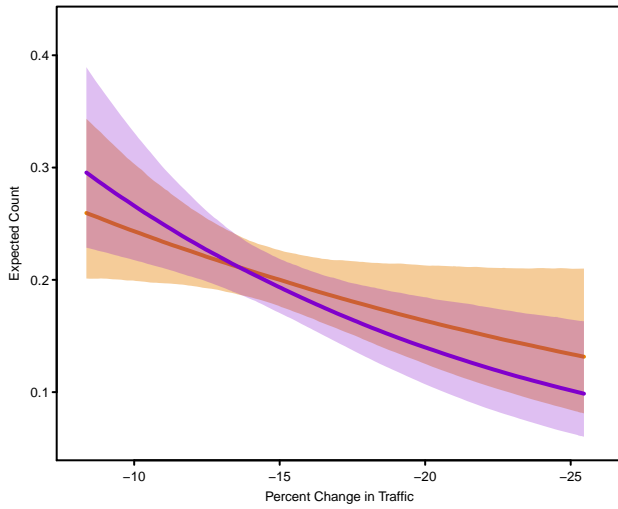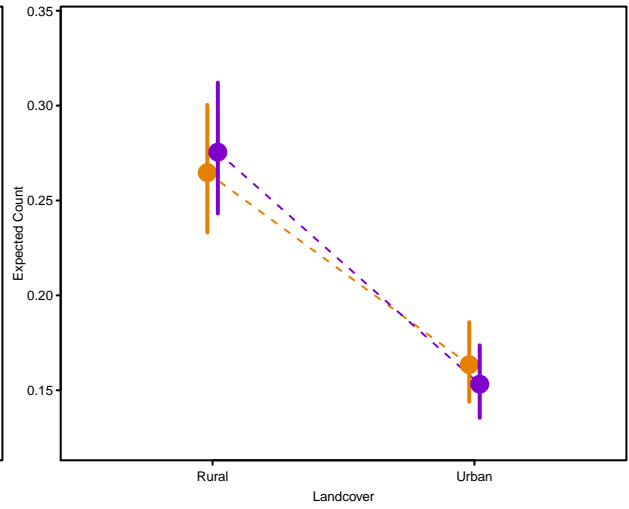

posterior distribution 95% CI  
for interaction with  
\*air\* includes zero

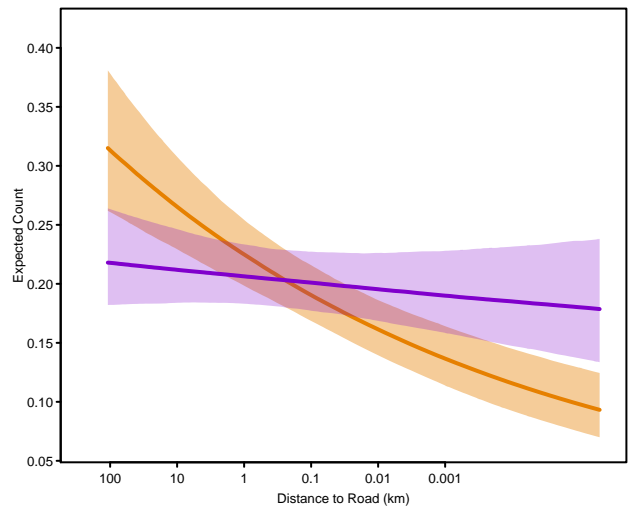

# Mallard

*Anas platyrhynchos*

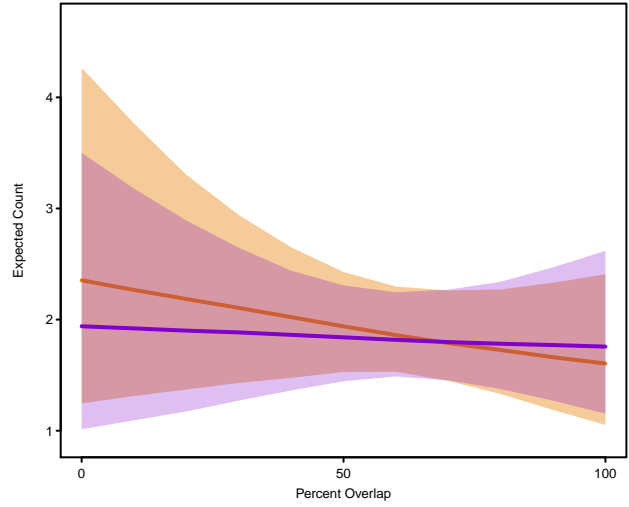

posterior distribution 95% CI  
for interaction with  
\*delta\_traf\* includes zero

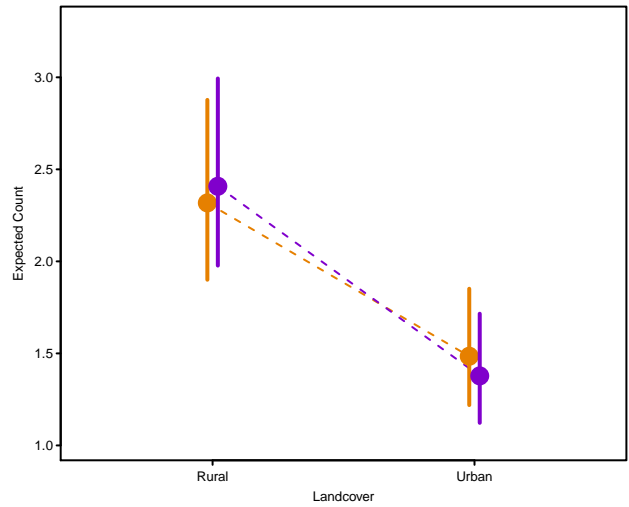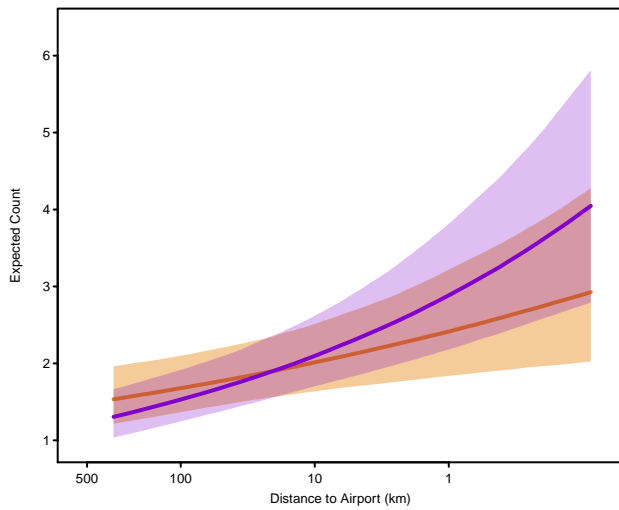

posterior distribution 95% CI  
for interaction with  
\*road\* includes zero



# Mourning Dove

*Zenaida macroura*

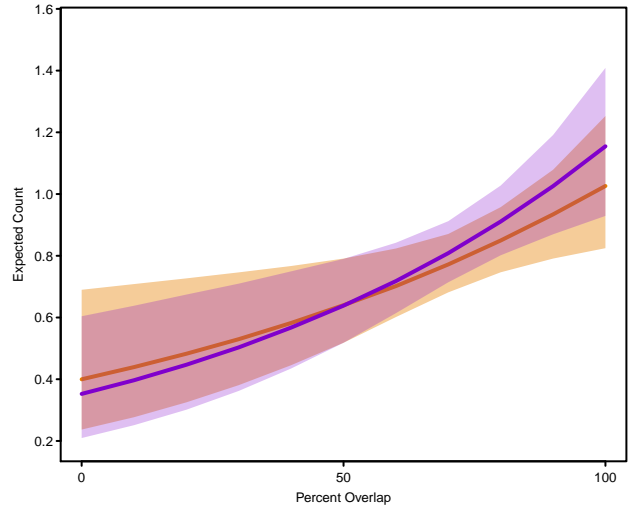

posterior distribution 95% CI  
for interaction with  
\*delta\_traf\* includes zero

posterior distribution 95% CI  
for interaction with  
\*land\* includes zero

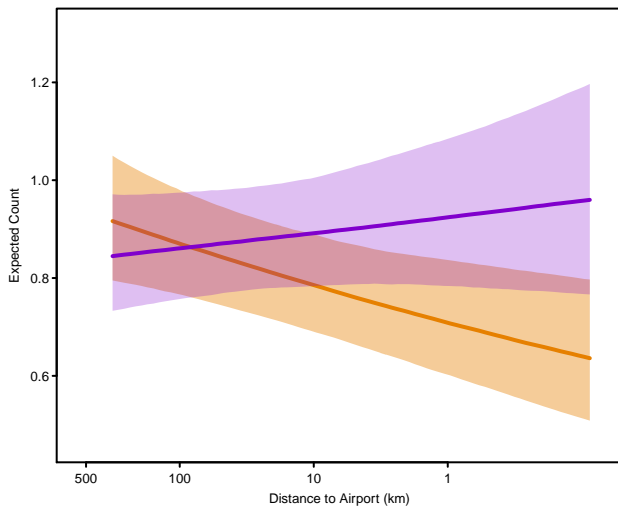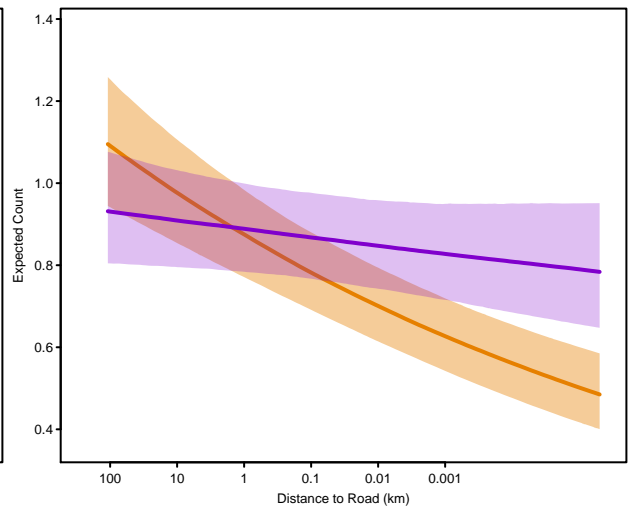

# Nashville Warbler

*Leiothlypis ruficapilla*



posterior distribution 95% CI  
for interaction with  
\*overlap\* includes zero

posterior distribution 95% CI  
for interaction with  
\*delta\_traf\* includes zero

posterior distribution 95% CI  
for interaction with  
\*land\* includes zero

posterior distribution 95% CI  
for interaction with  
\*air\* includes zero

posterior distribution 95% CI  
for interaction with  
\*road\* includes zero

# Northern Cardinal

*Cardinalis cardinalis*

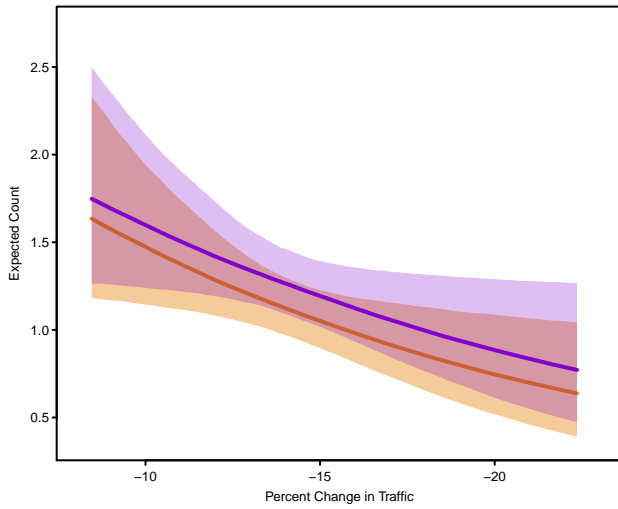

posterior distribution 95% CI  
for interaction with  
\*overlap\* includes zero

posterior distribution 95% CI  
for interaction with  
\*land\* includes zero

posterior distribution 95% CI  
for interaction with  
\*air\* includes zero

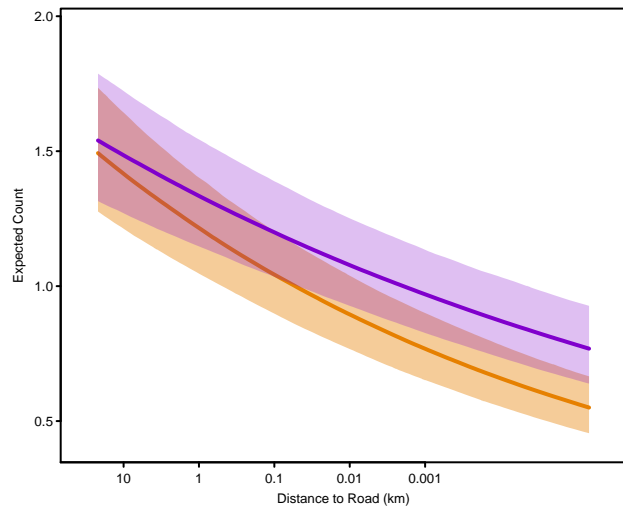

# Northern Flicker

*Colaptes auratus*

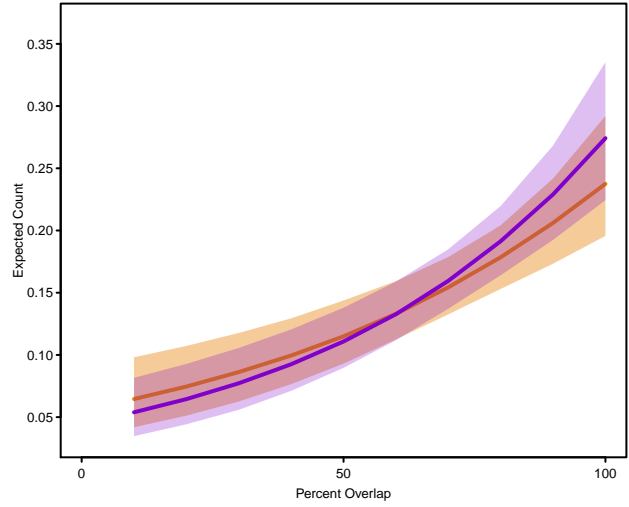

posterior distribution 95% CI  
for interaction with  
\*delta\_traf\* includes zero

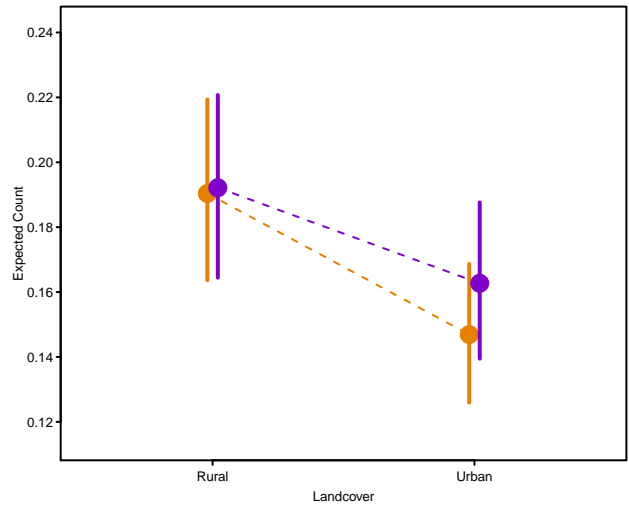

posterior distribution 95% CI  
for interaction with  
\*air\* includes zero

posterior distribution 95% CI  
for interaction with  
\*road\* includes zero

# Northern Mockingbird

*Mimus polyglottos*



posterior distribution 95% CI  
for interaction with  
\*overlap\* includes zero

posterior distribution 95% CI  
for interaction with  
\*delta\_traf\* includes zero

posterior distribution 95% CI  
for interaction with  
\*land\* includes zero

posterior distribution 95% CI  
for interaction with  
\*air\* includes zero

posterior distribution 95% CI  
for interaction with  
\*road\* includes zero

# Northern Parula

*Setophaga americana*

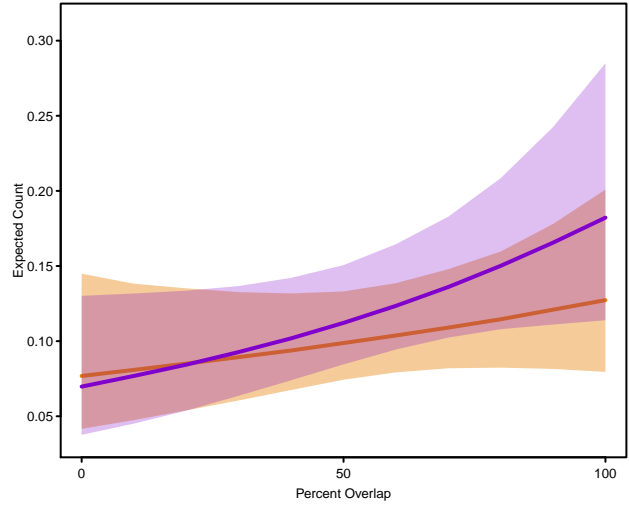

posterior distribution 95% CI  
for interaction with  
\*delta\_traf\* includes zero

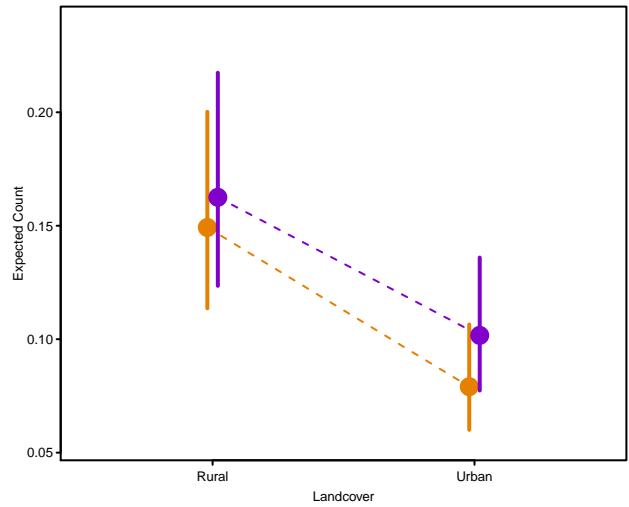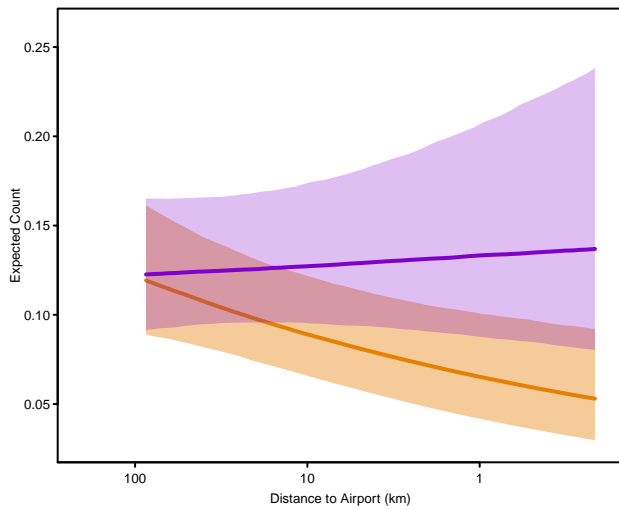

posterior distribution 95% CI  
for interaction with  
\*road\* includes zero

# Northern Rough-winged Swallow

*Stelgidopteryx serripennis*

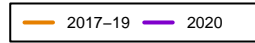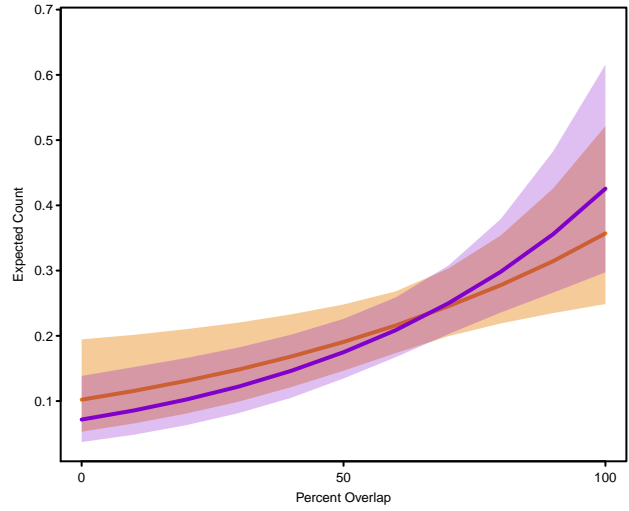

posterior distribution 95% CI  
for interaction with  
\*delta\_traf\* includes zero

posterior distribution 95% CI  
for interaction with  
\*land\* includes zero

posterior distribution 95% CI  
for interaction with  
\*air\* includes zero

posterior distribution 95% CI  
for interaction with  
\*road\* includes zero

# Orange-crowned Warbler

*Leiothlypis celata*



posterior distribution 95% CI  
for interaction with  
\*overlap\* includes zero

posterior distribution 95% CI  
for interaction with  
\*delta\_traf\* includes zero

posterior distribution 95% CI  
for interaction with  
\*land\* includes zero

posterior distribution 95% CI  
for interaction with  
\*air\* includes zero

posterior distribution 95% CI  
for interaction with  
\*road\* includes zero



# Osprey

*Pandion haliaetus*

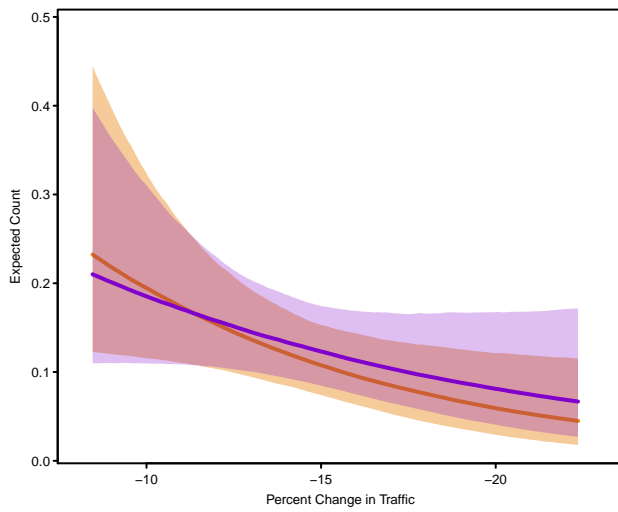

posterior distribution 95% CI  
for interaction with  
\*overlap\* includes zero

posterior distribution 95% CI  
for interaction with  
\*land\* includes zero

posterior distribution 95% CI  
for interaction with  
\*air\* includes zero

posterior distribution 95% CI  
for interaction with  
\*road\* includes zero

# Palm Warbler

*Setophaga palmarum*

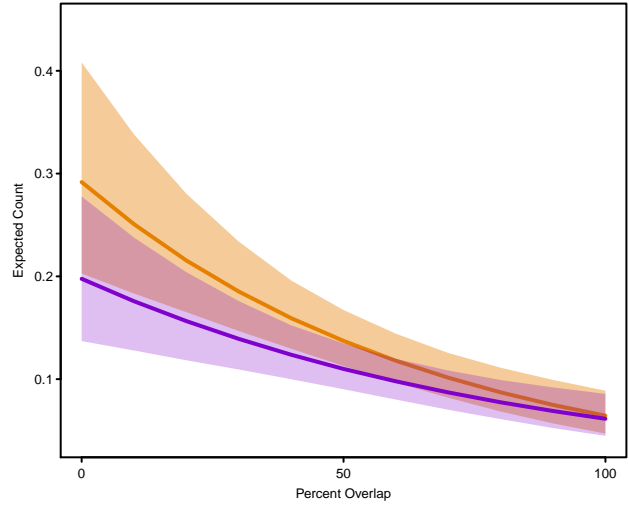

posterior distribution 95% CI  
for interaction with  
\*delta\_traf\* includes zero

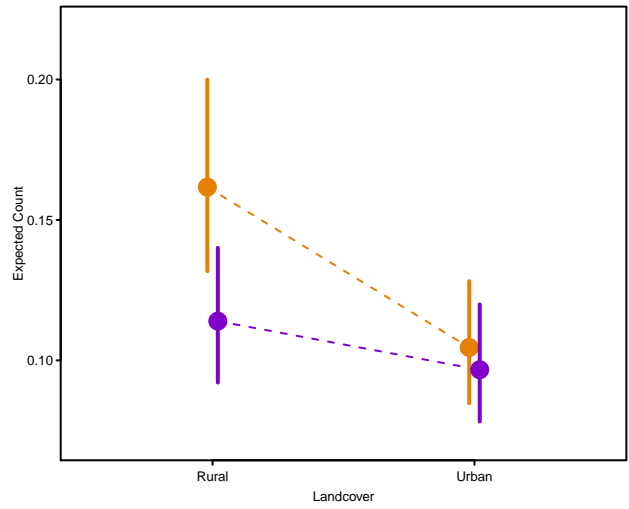

posterior distribution 95% CI  
for interaction with  
\*air\* includes zero

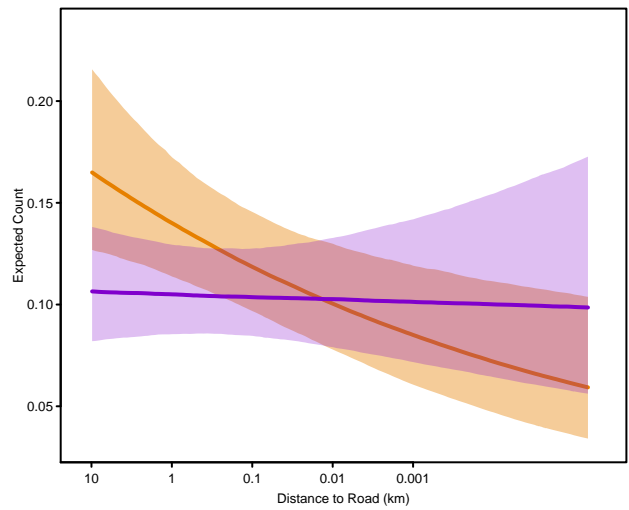

## Pied-billed Grebe

*Podilymbus podiceps*

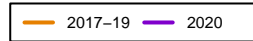

posterior distribution 95% CI  
for interaction with  
\*overlap\* includes zero

posterior distribution 95% CI  
for interaction with  
\*delta\_traf\* includes zero

posterior distribution 95% CI  
for interaction with  
\*land\* includes zero

posterior distribution 95% CI  
for interaction with  
\*air\* includes zero

posterior distribution 95% CI  
for interaction with  
\*road\* includes zero

# Pileated Woodpecker

*Dryocopus pileatus*

posterior distribution 95% CI  
for interaction with  
\*overlap\* includes zero

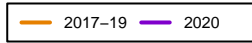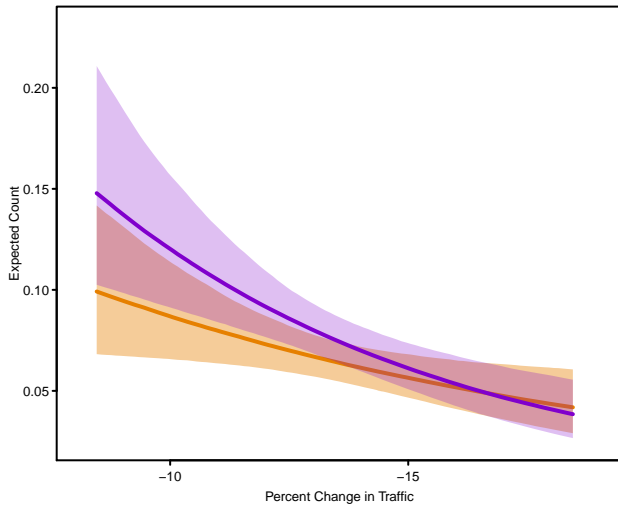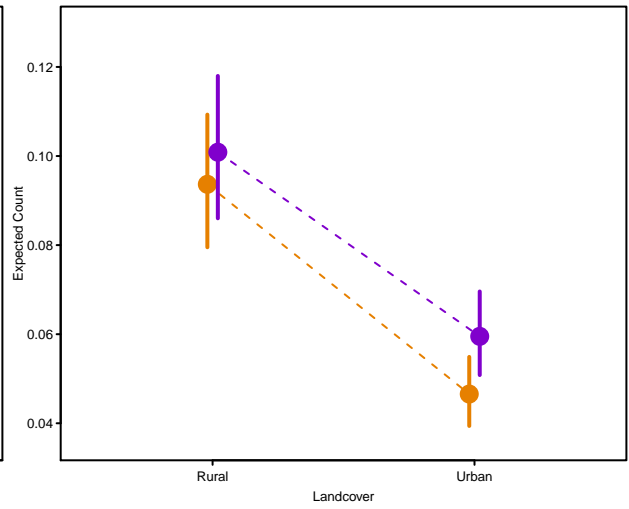

posterior distribution 95% CI  
for interaction with  
\*air\* includes zero

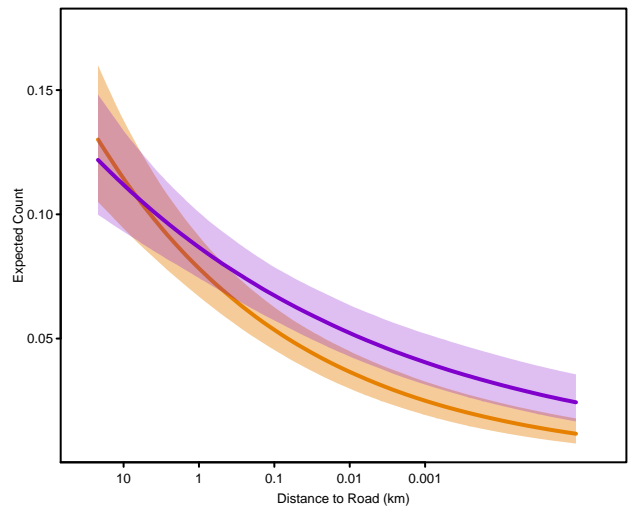

# Red-bellied Woodpecker

*Melanerpes carolinus*

posterior distribution 95% CI  
for interaction with  
\*overlap\* includes zero

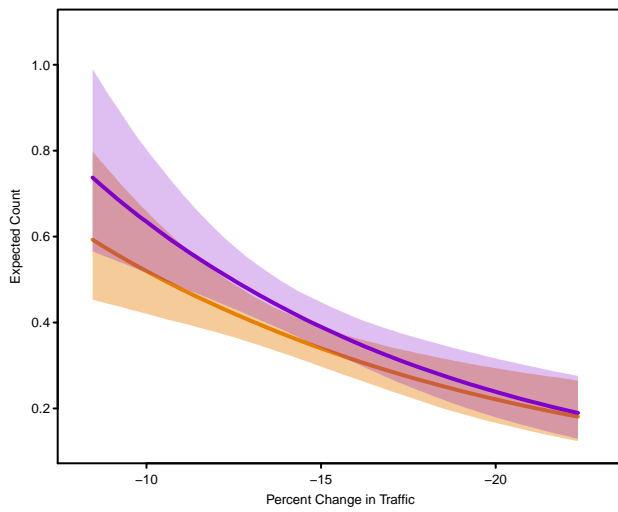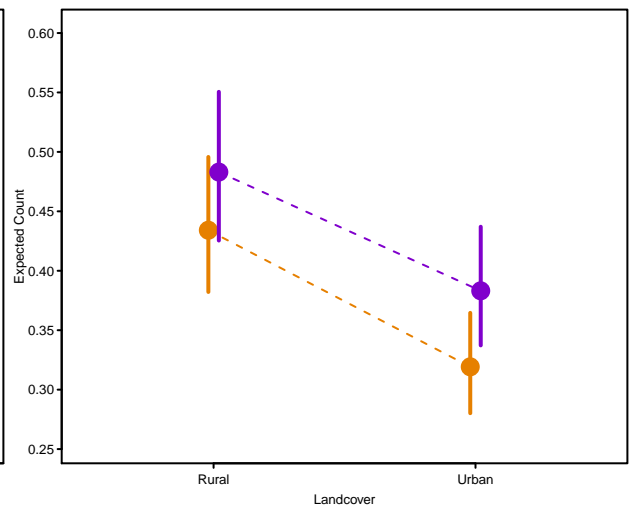

posterior distribution 95% CI  
for interaction with  
\*air\* includes zero

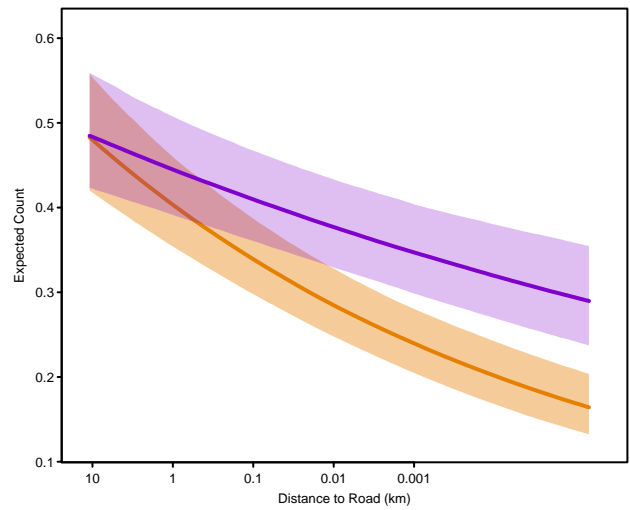

# Red-eyed Vireo

*Vireo olivaceus*

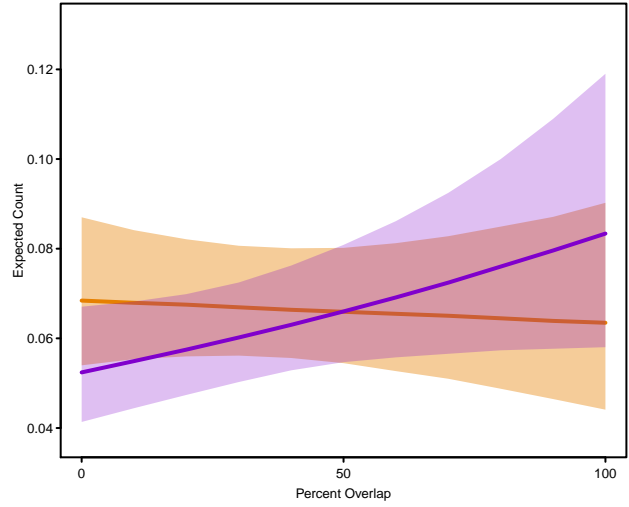

posterior distribution 95% CI  
for interaction with  
\*delta\_traf\* includes zero

posterior distribution 95% CI  
for interaction with  
\*land\* includes zero

posterior distribution 95% CI  
for interaction with  
\*air\* includes zero

posterior distribution 95% CI  
for interaction with  
\*road\* includes zero

# Red-shouldered Hawk

*Buteo lineatus*

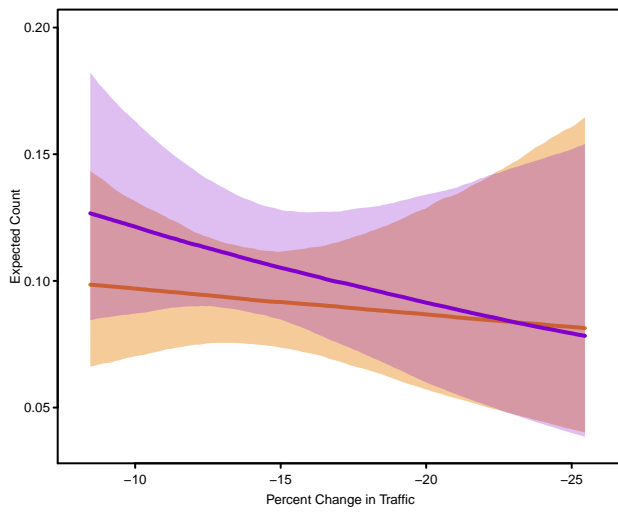

posterior distribution 95% CI  
for interaction with  
\*overlap\* includes zero

posterior distribution 95% CI  
for interaction with  
\*land\* includes zero

posterior distribution 95% CI  
for interaction with  
\*air\* includes zero

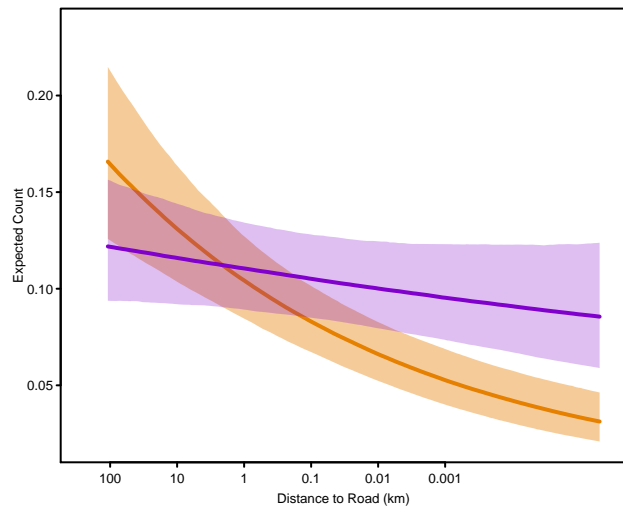

# Red-tailed Hawk

*Buteo jamaicensis*



posterior distribution 95% CI  
for interaction with  
\*overlap\* includes zero

posterior distribution 95% CI  
for interaction with  
\*delta\_traf\* includes zero

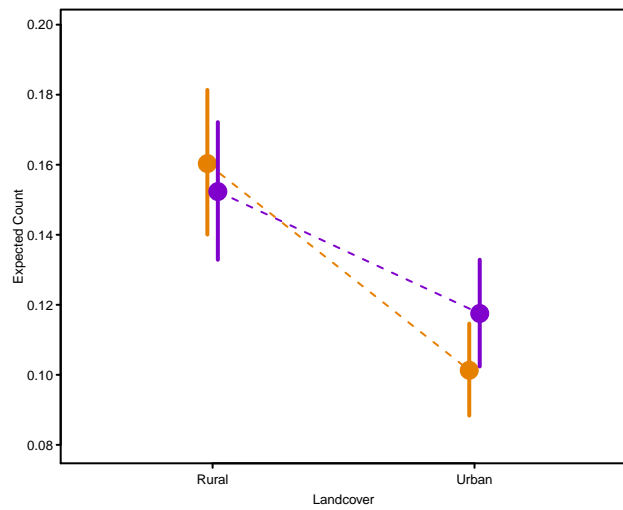

posterior distribution 95% CI  
for interaction with  
\*air\* includes zero

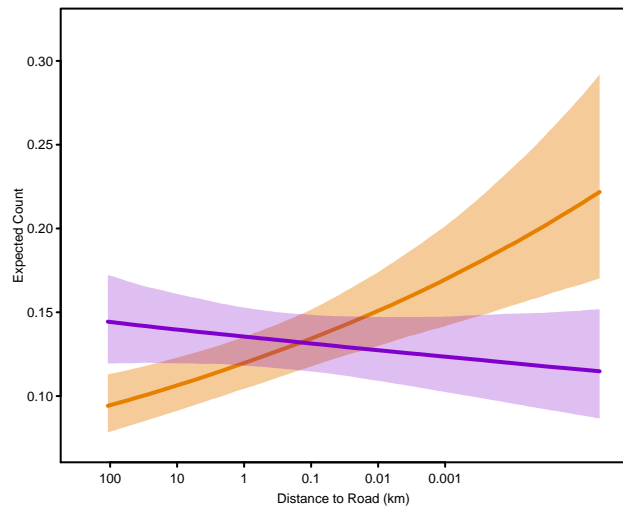



# Red-winged Blackbird

*Agelaius phoeniceus*

2017-19 2020

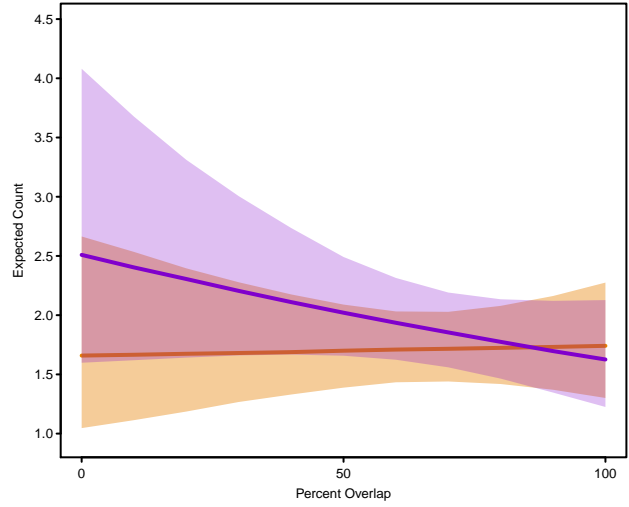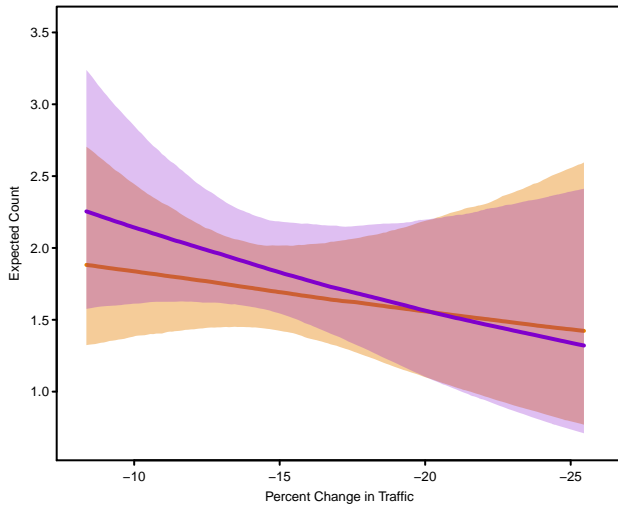

posterior distribution 95% CI  
for interaction with  
\*land\* includes zero

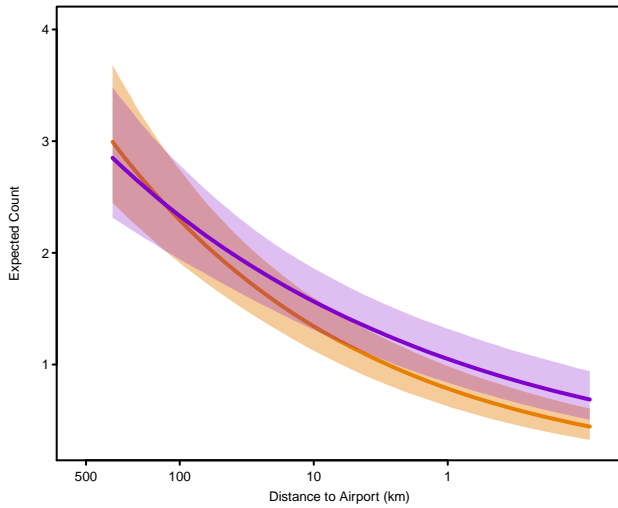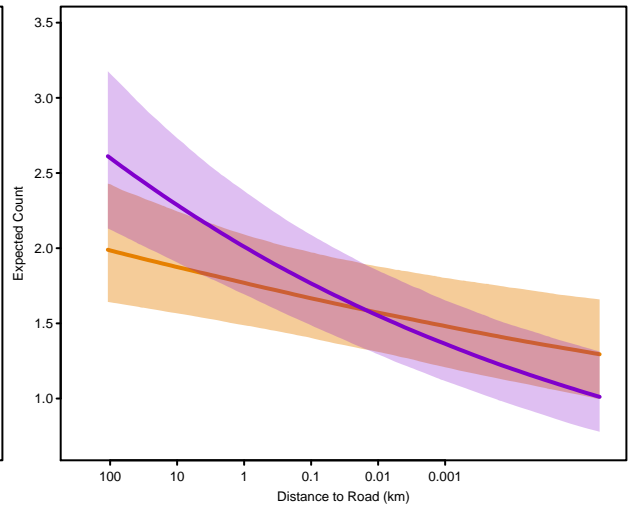

# Ring-billed Gull

*Larus delawarensis*



posterior distribution 95% CI  
for interaction with  
\*overlap\* includes zero

posterior distribution 95% CI  
for interaction with  
\*delta\_traf\* includes zero

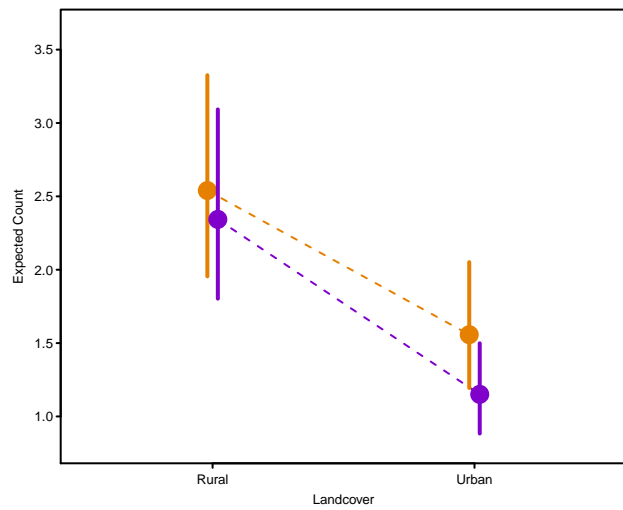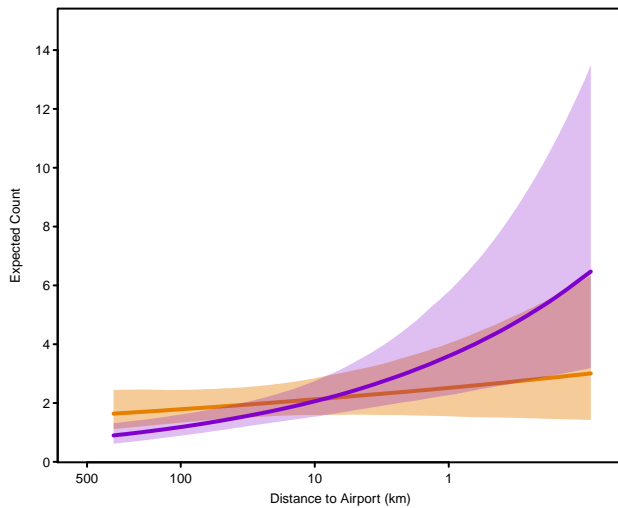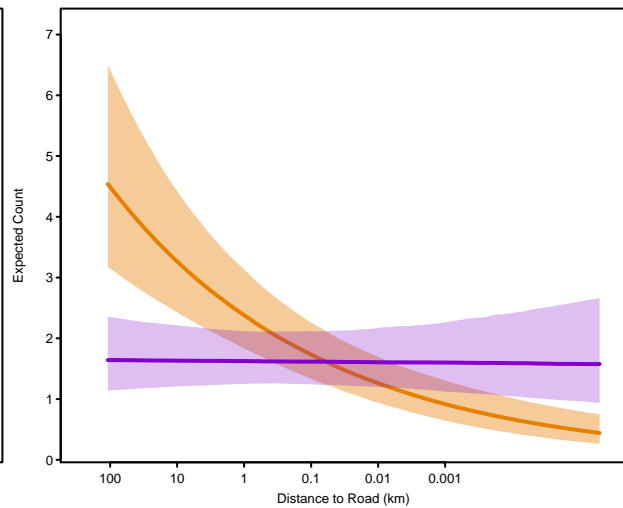

# Rock Pigeon

*Columba livia*



posterior distribution 95% CI  
for interaction with  
\*overlap\* includes zero

posterior distribution 95% CI  
for interaction with  
\*delta\_traf\* includes zero

posterior distribution 95% CI  
for interaction with  
\*land\* includes zero

posterior distribution 95% CI  
for interaction with  
\*air\* includes zero

posterior distribution 95% CI  
for interaction with  
\*road\* includes zero

# Rose-breasted Grosbeak

*Pheucticus ludovicianus*

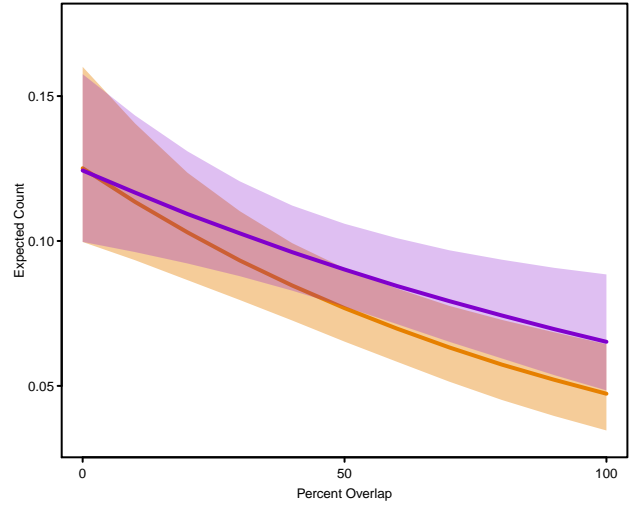

posterior distribution 95% CI  
for interaction with  
\*delta\_traf\* includes zero

posterior distribution 95% CI  
for interaction with  
\*land\* includes zero

posterior distribution 95% CI  
for interaction with  
\*air\* includes zero

posterior distribution 95% CI  
for interaction with  
\*road\* includes zero

# Ruby-crowned Kinglet

*Regulus calendula*



posterior distribution 95% CI  
for interaction with  
\*delta\_traf\* includes zero

posterior distribution 95% CI  
for interaction with  
\*air\* includes zero

posterior distribution 95% CI  
for interaction with  
\*overlap\* includes zero

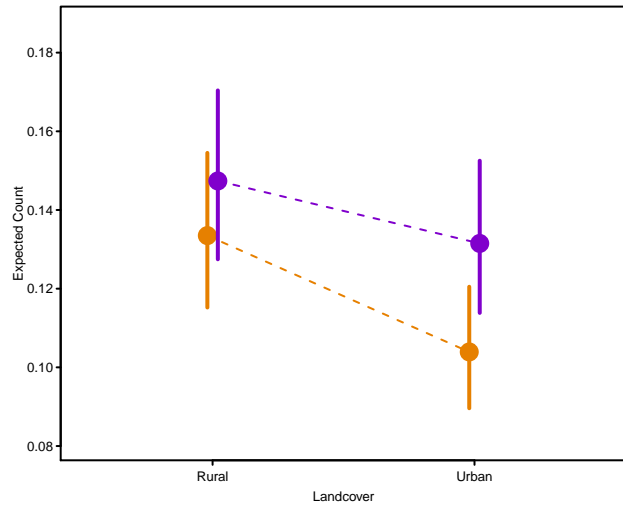

posterior distribution 95% CI  
for interaction with  
\*road\* includes zero

# Ruby-throated Hummingbird

*Archilochus colubris*

2017-19 2020

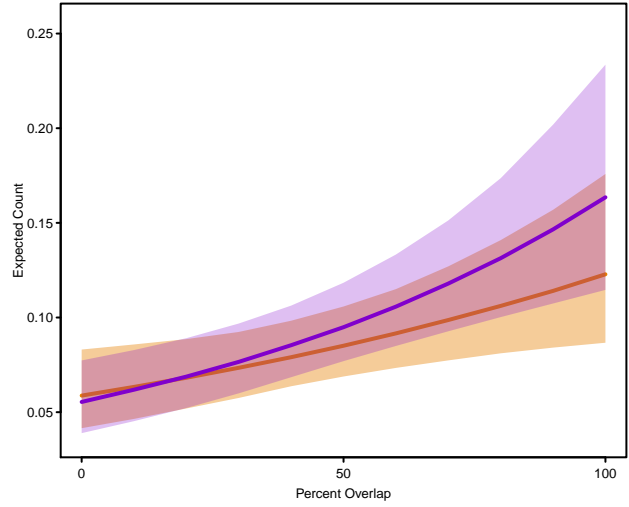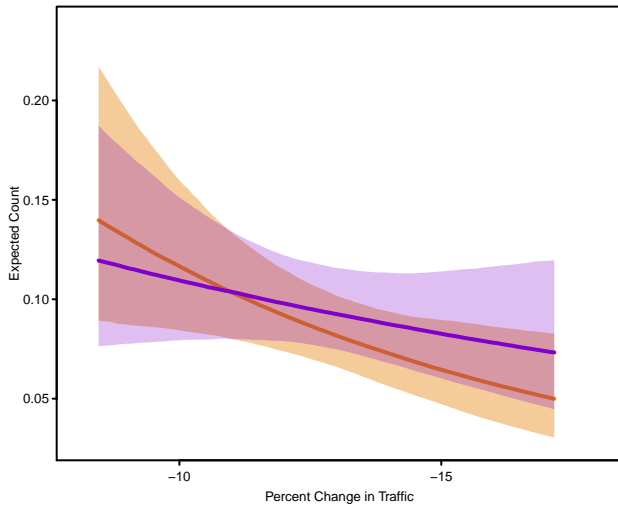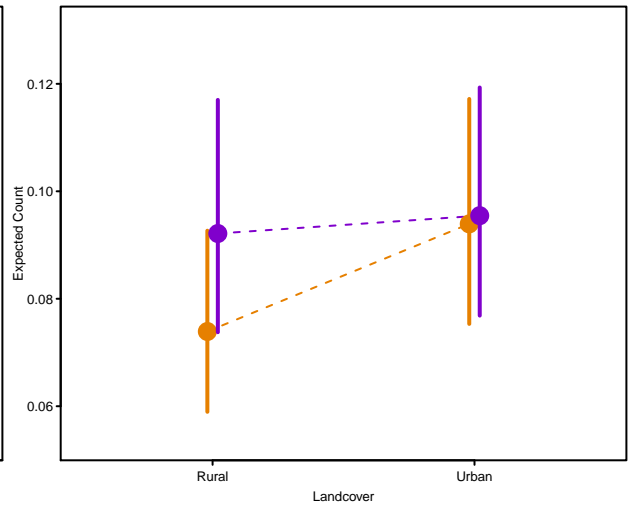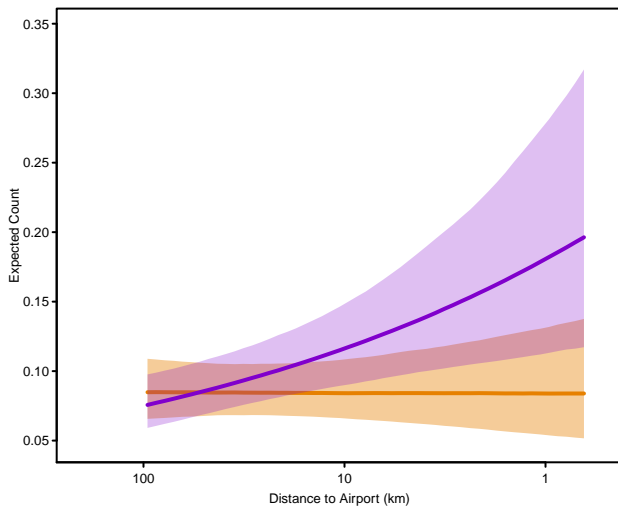

posterior distribution 95% CI  
for interaction with  
\*road\* includes zero

# Snowy Egret

*Egretta thula*



posterior distribution 95% CI  
for interaction with  
\*overlap\* includes zero

posterior distribution 95% CI  
for interaction with  
\*delta\_traf\* includes zero

posterior distribution 95% CI  
for interaction with  
\*land\* includes zero

posterior distribution 95% CI  
for interaction with  
\*air\* includes zero

posterior distribution 95% CI  
for interaction with  
\*road\* includes zero

# Song Sparrow

*Melospiza melodia*

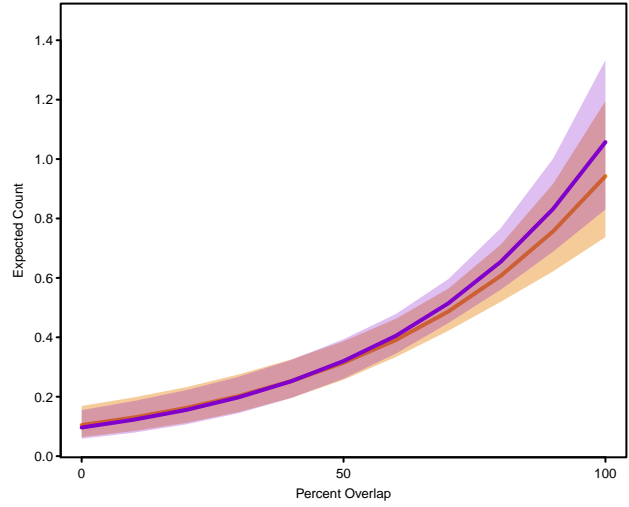

posterior distribution 95% CI  
for interaction with  
\*delta\_traf\* includes zero

posterior distribution 95% CI  
for interaction with  
\*land\* includes zero

posterior distribution 95% CI  
for interaction with  
\*air\* includes zero

posterior distribution 95% CI  
for interaction with  
\*road\* includes zero



# Swainson's Thrush

*Catharus ustulatus*

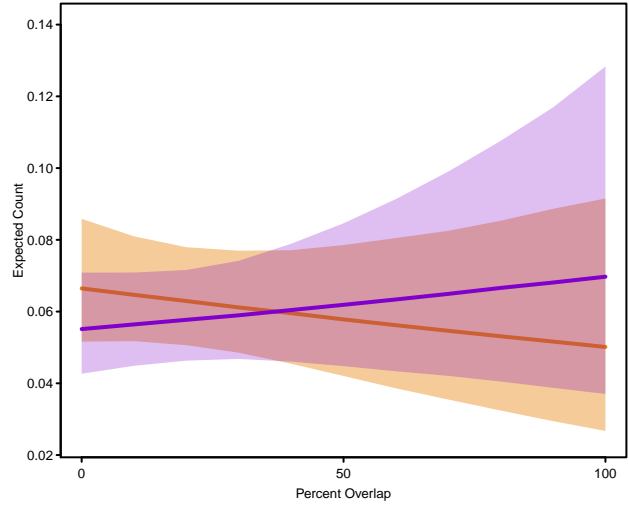

posterior distribution 95% CI  
for interaction with  
\*delta\_traf\* includes zero

posterior distribution 95% CI  
for interaction with  
\*land\* includes zero

posterior distribution 95% CI  
for interaction with  
\*air\* includes zero

posterior distribution 95% CI  
for interaction with  
\*road\* includes zero

# Tree Swallow

*Tachycineta bicolor*

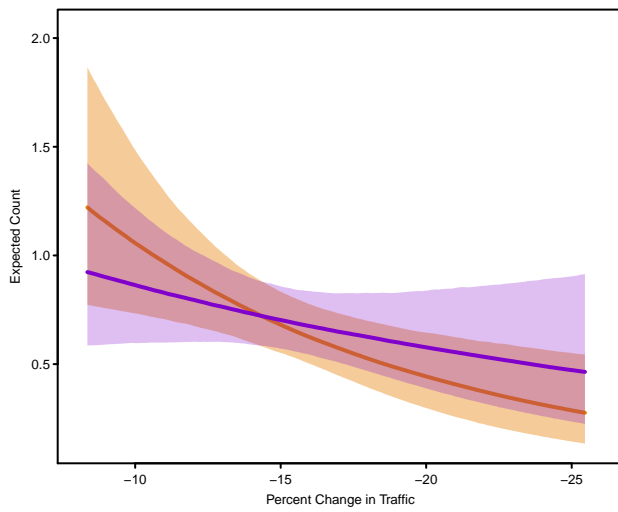

posterior distribution 95% CI  
for interaction with  
\*overlap\* includes zero

posterior distribution 95% CI  
for interaction with  
\*land\* includes zero

posterior distribution 95% CI  
for interaction with  
\*air\* includes zero

posterior distribution 95% CI  
for interaction with  
\*road\* includes zero

# Tufted Titmouse

*Baeolophus bicolor*

2017-19 2020

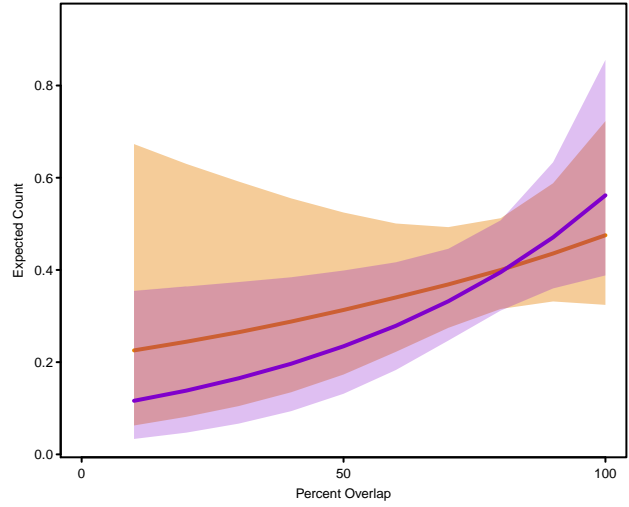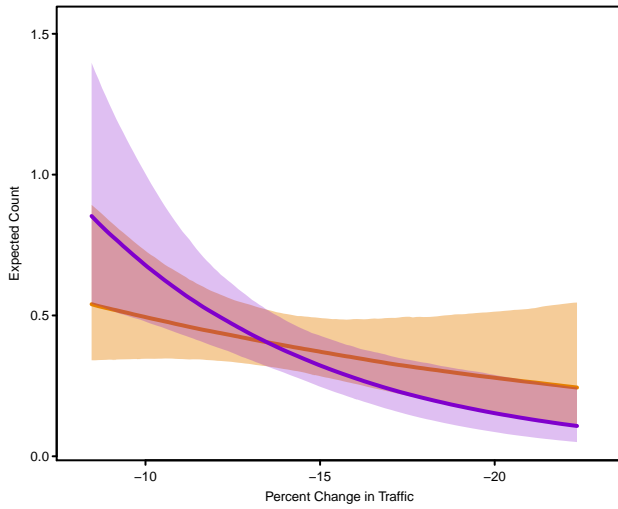

posterior distribution 95% CI  
for interaction with  
\*land\* includes zero

posterior distribution 95% CI  
for interaction with  
\*air\* includes zero

posterior distribution 95% CI  
for interaction with  
\*road\* includes zero

# Turkey Vulture

*Cathartes aura*

posterior distribution 95% CI  
for interaction with  
\*overlap\* includes zero

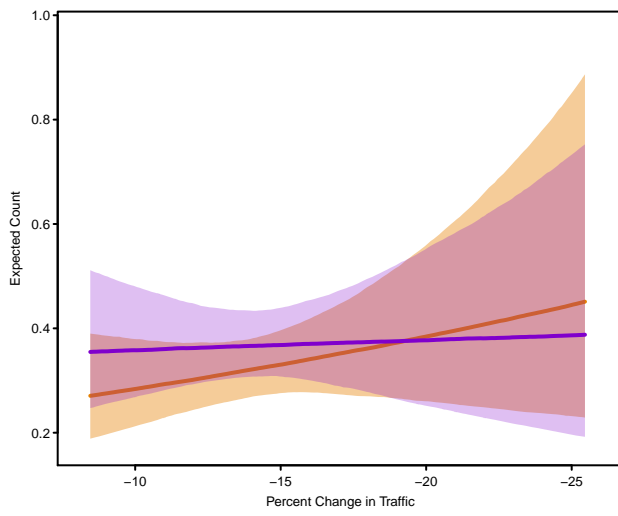

posterior distribution 95% CI  
for interaction with  
\*land\* includes zero

posterior distribution 95% CI  
for interaction with  
\*air\* includes zero

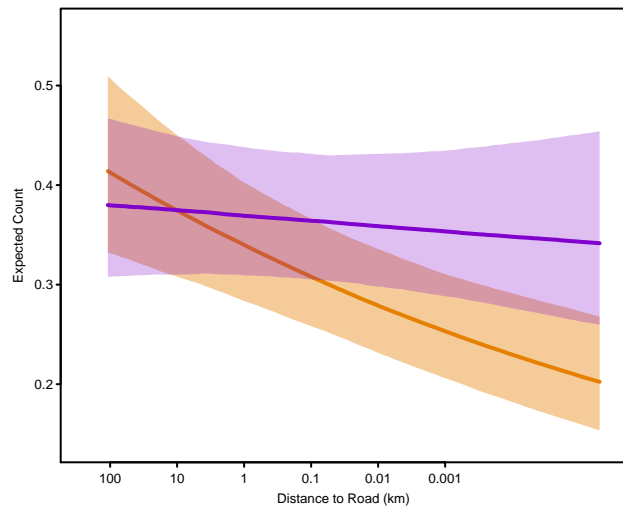

# Warbling Vireo

*Vireo gilvus*

posterior distribution 95% CI  
for interaction with  
\*overlap\* includes zero



posterior distribution 95% CI  
for interaction with  
\*delta\_traf\* includes zero

posterior distribution 95% CI  
for interaction with  
\*land\* includes zero

posterior distribution 95% CI  
for interaction with  
\*air\* includes zero

posterior distribution 95% CI  
for interaction with  
\*road\* includes zero

# White-breasted Nuthatch

*Sitta carolinensis*

2017-19 2020

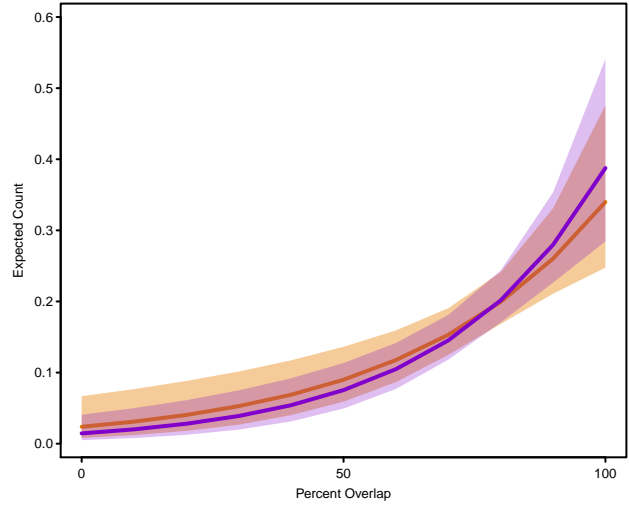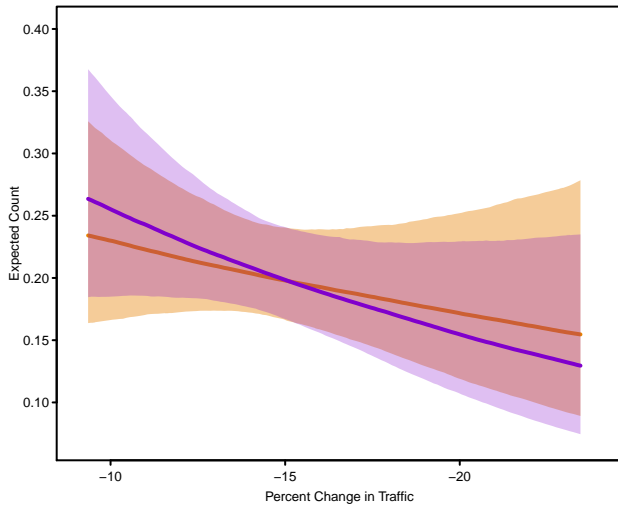

posterior distribution 95% CI  
for interaction with  
\*land\* includes zero

posterior distribution 95% CI  
for interaction with  
\*air\* includes zero

posterior distribution 95% CI  
for interaction with  
\*road\* includes zero

# White-crowned Sparrow

*Zonotrichia leucophrys*

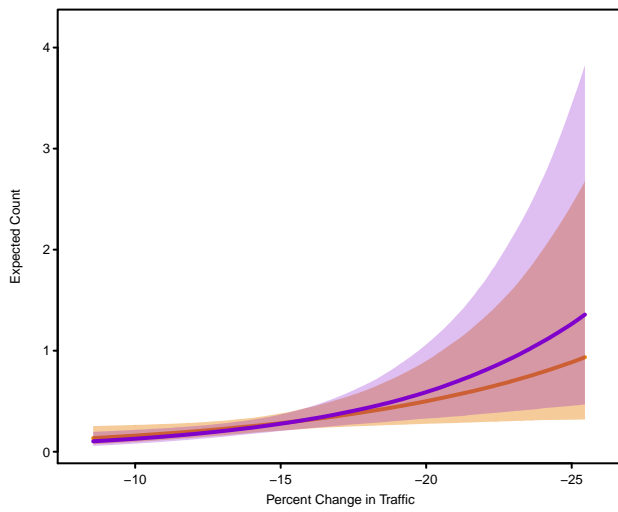

posterior distribution 95% CI  
for interaction with  
\*overlap\* includes zero

posterior distribution 95% CI  
for interaction with  
\*land\* includes zero

posterior distribution 95% CI  
for interaction with  
\*air\* includes zero

posterior distribution 95% CI  
for interaction with  
\*road\* includes zero

# White-eyed Vireo

*Vireo griseus*



posterior distribution 95% CI  
for interaction with  
\*overlap\* includes zero

posterior distribution 95% CI  
for interaction with  
\*delta\_traf\* includes zero

posterior distribution 95% CI  
for interaction with  
\*land\* includes zero

posterior distribution 95% CI  
for interaction with  
\*air\* includes zero

posterior distribution 95% CI  
for interaction with  
\*road\* includes zero



# White-throated Sparrow

*Zonotrichia albicollis*

2017-19 2020

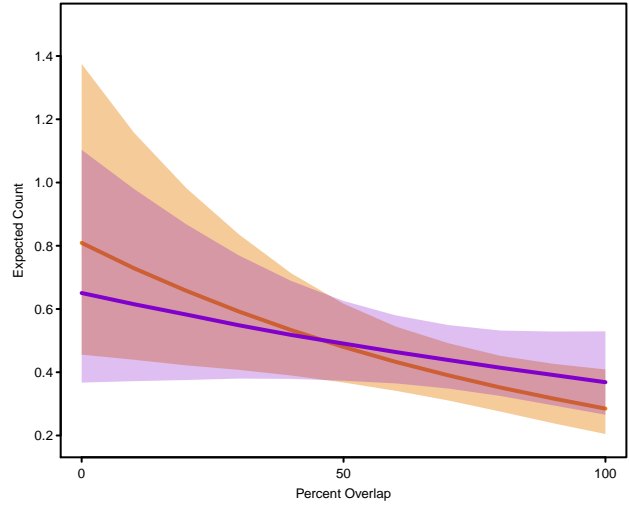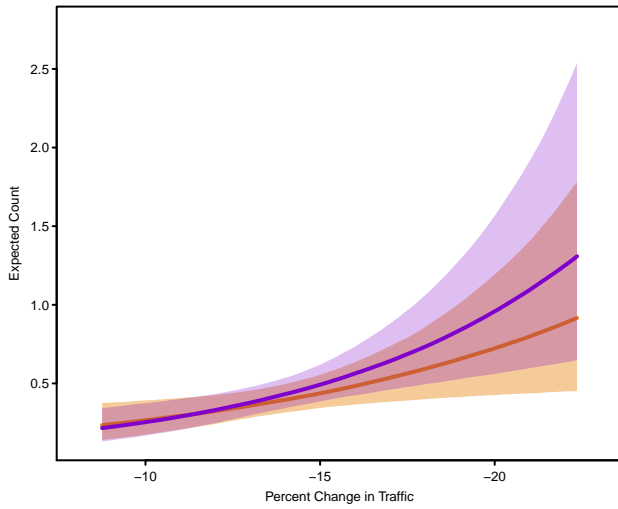

posterior distribution 95% CI  
for interaction with  
\*land\* includes zero

posterior distribution 95% CI  
for interaction with  
\*air\* includes zero

posterior distribution 95% CI  
for interaction with  
\*road\* includes zero

# Wood Duck

*Aix sponsa*

posterior distribution 95% CI  
for interaction with  
\*overlap\* includes zero



posterior distribution 95% CI  
for interaction with  
\*delta\_traf\* includes zero

posterior distribution 95% CI  
for interaction with  
\*land\* includes zero

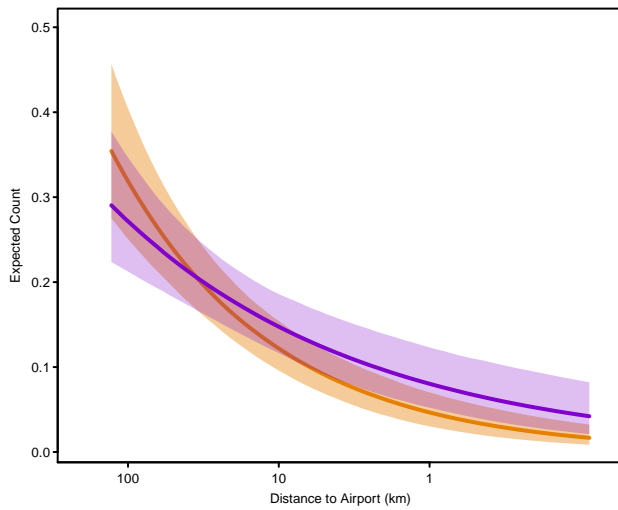

posterior distribution 95% CI  
for interaction with  
\*road\* includes zero

# Yellow-rumped Warbler

*Setophaga coronata*

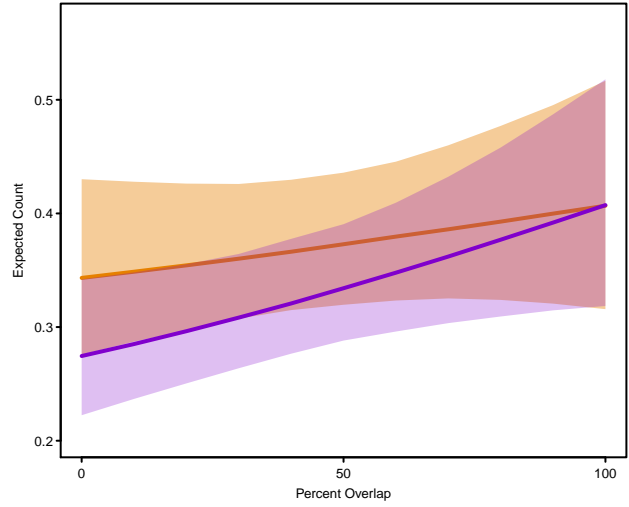

posterior distribution 95% CI  
for interaction with  
\*delta\_traf\* includes zero

posterior distribution 95% CI  
for interaction with  
\*land\* includes zero

posterior distribution 95% CI  
for interaction with  
\*air\* includes zero

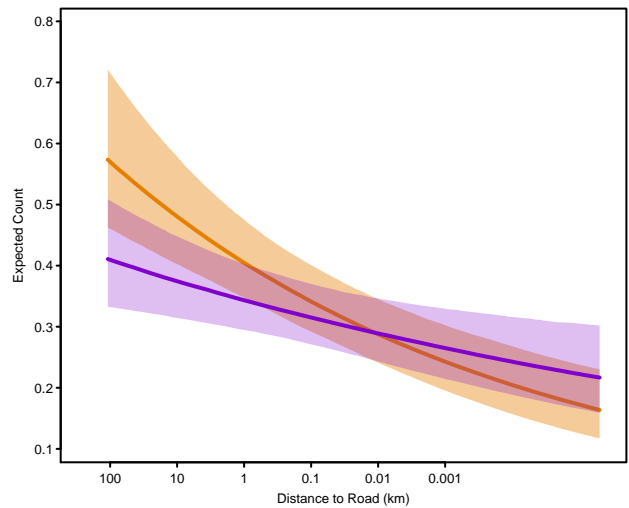

# Yellow Warbler

*Setophaga petechia*

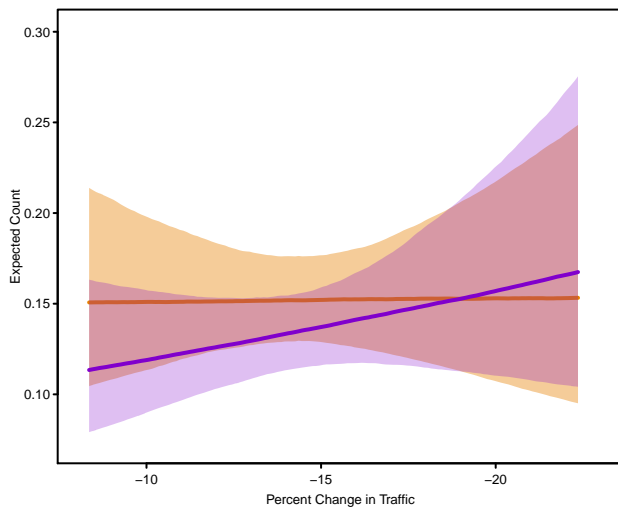

posterior distribution 95% CI  
for interaction with  
\*overlap\* includes zero

posterior distribution 95% CI  
for interaction with  
\*land\* includes zero

posterior distribution 95% CI  
for interaction with  
\*air\* includes zero

posterior distribution 95% CI  
for interaction with  
\*road\* includes zero

**Table S1.**

Summary statistics for variables used in the modeling process. Note that distances to airports and roads were logged for modeling (see Figs. S3-S4).

| <b>Variable</b>          | <b>Type</b>                 | <b>Range</b>          | <b>Mean (S.D)</b> |
|--------------------------|-----------------------------|-----------------------|-------------------|
| County                   | Categorical, random         | <i>n.a.</i>           | <i>n.a.</i>       |
| Pandemic                 | Categorical                 | Pre-, During-pandemic | <i>n.a.</i>       |
| Distance (km)            | Continuous                  | [0, 3]                | 0.757 (0.88)      |
| Duration (min)           | Continuous                  | [1, 300]              | 48.7 (47.5)       |
| Change in Traffic (%)    | Continuous, county specific | [-25.4, -8.37]        | -14.3 (3.17)      |
| Overlap (%)              | Continuous, county specific | [0, 100]              | 65.2 (25.5)       |
| Distance to airport (km) | Continuous                  | [0.09, 292]           | 35.0 (19.3)       |
| Distance to road (km)    | Continuous                  | (0, 98.2]             | 0.775 (2.18)      |
| Landcover                | Categorical                 | Urban, Rural          | <i>n.a.</i>       |

**Table S2.**

Contingency table of the number of checklists (in all counties) that came from urban vs. rural habitat in each time period. Pearson's Chi-squared test with Yates' continuity correction ( $\chi^2 = 0.0219$ ,  $df = 1$ ,  $p = 0.8824$ ).

| Period    | Urban | Rural |
|-----------|-------|-------|
| 2017-2019 | 23064 | 21239 |
| 2020      | 23041 | 21262 |

**Table S3.**

Detectability values used for each species, calculations sensu (46), with data from the Canadian Wildlife Service and (49).

| <b>Species</b>           | <b>Detectability</b> | <b>Species</b>            | <b>Detectability</b> |
|--------------------------|----------------------|---------------------------|----------------------|
| American crow            | 0.619                | hairy woodpecker          | 0.217                |
| American goldfinch       | 0.186                | house sparrow             | 0.474                |
| American redstart        | 0.255                | house wren                | 0.595                |
| American robin           | 0.451                | indigo bunting            | 0.406                |
| Baltimore oriole         | 0.357                | killdeer                  | 0.430                |
| barn swallow             | 0.288                | mallard                   | 0.455                |
| black-and-white warbler  | 0.249                | mourning dove             | 0.571                |
| black-capped chickadee   | 0.240                | Nashville warbler         | 0.406                |
| belted kingfisher        | 0.180                | northern flicker          | 0.307                |
| brown-headed cowbird     | 0.303                | northern parula           | 0.327                |
| blue jay                 | 0.398                | orange-crowned warbler    | 0.234                |
| brown thrasher           | 0.533                | palm warbler              | 0.278                |
| blue-winged teal         | 0.440                | pileated woodpecker       | 0.355                |
| Canada goose             | 0.371                | rose-breasted grosbeak    | 0.413                |
| cedar waxwing            | 0.159                | ruby-crowned kinglet      | 0.375                |
| chipping sparrow         | 0.323                | red-eyed vireo            | 0.520                |
| common grackle           | 0.384                | ruby-throated hummingbird | 0.055                |
| common yellowthroat      | 0.413                | red-winged blackbird      | 0.546                |
| dark-eyed junco          | 0.275                | song sparrow              | 0.446                |
| downy woodpecker         | 0.199                | Swainson's thrush         | 0.430                |
| eastern bluebird         | 0.165                | tree swallow              | 0.406                |
| eastern kingbird         | 0.370                | warbling vireo            | 0.373                |
| eastern phoebe           | 0.356                | white-breasted nuthatch   | 0.265                |
| eastern towhee           | 0.457                | white-crowned sparrow     | 0.490                |
| European starling        | 0.534                | white-throated sparrow    | 0.460                |
| great crested flycatcher | 0.391                | yellow warbler            | 0.388                |
| gray catbird             | 0.277                | yellow-rumped warbler     | 0.251                |

**Table S4.**

Impacts of detectability on the probability of species showing increases or any change in counts relative to lower human activity during the pandemic period ( $n = 54$  species). LCL = lower 95% confidence limit, HCL = upper 95% confidence limit.

| Variable                                                                                                             | $\beta$ | SE    | $p$   | LCL    | HCL    |
|----------------------------------------------------------------------------------------------------------------------|---------|-------|-------|--------|--------|
| <i>Were less detectable species more likely to show increased counts in areas with decreased human activity?</i>     |         |       |       |        |        |
| Urban-rural                                                                                                          | -1.607  | 2.729 | 0.556 | -6.955 | 3.741  |
| Distance to airport                                                                                                  | 6.416   | 7.915 | 0.418 | -9.097 | 21.930 |
| Distance to road                                                                                                     | -0.119  | 2.806 | 0.966 | -5.619 | 5.381  |
| Change in traffic                                                                                                    | 0.269   | 2.992 | 0.928 | -5.595 | 6.132  |
| Overlap migration-travel restrictions                                                                                | -1.207  | 2.280 | 0.597 | -5.675 | 3.261  |
| <i>Were less detectable species more likely to show any change in counts in areas with decreased human activity?</i> |         |       |       |        |        |
| Urban-rural                                                                                                          | -3.803  | 2.563 | 0.138 | -8.826 | 1.220  |
| Distance to airport                                                                                                  | 4.317   | 3.417 | 0.206 | -2.379 | 11.014 |
| Distance to road                                                                                                     | 1.082   | 2.546 | 0.671 | -3.908 | 6.071  |
| Change in traffic                                                                                                    | 0.557   | 2.505 | 0.824 | -4.352 | 5.466  |
| Overlap migration-travel restrictions                                                                                | -0.350  | 2.322 | 0.880 | -4.902 | 4.201  |



**Table S5.**

Impacts of mean species body size on the probability of species showing increases or any change in counts relative to lower human activity during the pandemic period ( $n = 82$  species). LCL = lower 95% confidence limit, HCL = upper 95% confidence limit.

| Variable                                                                                                     | $\beta$ | SE    | $p$   | LCL    | HCL   |
|--------------------------------------------------------------------------------------------------------------|---------|-------|-------|--------|-------|
| <i>Were smaller species more likely to show increased counts in areas with decreased human activity?</i>     |         |       |       |        |       |
| Urban-rural                                                                                                  | 0.003   | 0.175 | 0.987 | -0.339 | 0.345 |
| Distance to airport                                                                                          | 0.357   | 0.152 | 0.019 | 0.059  | 0.656 |
| Distance to road                                                                                             | 0.090   | 0.152 | 0.553 | -0.208 | 0.388 |
| Change in traffic                                                                                            | -0.071  | 0.201 | 0.722 | -0.464 | 0.322 |
| Overlap migration-travel restrictions                                                                        | -0.156  | 0.132 | 0.238 | -0.414 | 0.103 |
| <i>Were smaller species more likely to show any change in counts in areas with decreased human activity?</i> |         |       |       |        |       |
| Urban-rural                                                                                                  | 0.069   | 0.135 | 0.612 | -0.197 | 0.334 |
| Distance to airport                                                                                          | 0.289   | 0.145 | 0.047 | 0.004  | 0.574 |
| Distance to road                                                                                             | 0.101   | 0.140 | 0.472 | -0.174 | 0.375 |
| Change in traffic                                                                                            | -0.005  | 0.162 | 0.978 | -0.322 | 0.313 |
| Overlap migration-travel restrictions                                                                        | -0.159  | 0.129 | 0.219 | -0.412 | 0.094 |

**Data S1. (separate file)**

A list of all counties included in the modeling process with associated metadata.

Columns include:

County = county name

eBird\_county\_code = county code used in the eBird database

major\_city = name of the major city located in the county

Country = country name

eBird\_country\_code = country code used in the eBird database

State = state/province name

eBird\_state\_code = state/province code used in the eBird database

latitude = latitude of a point in the center of the checklists from that county

longitude = longitude of a point in the center of the checklists from that county

**Data S2. (separate file)**

A list of all species included in the study with associated metadata.

Columns include:

eBird\_species\_code = 6-character taxonomic code used in the eBird database

common\_name = English common name

scientific\_name = scientific name

family = taxonomic family

band\_code = 4-character banding code

notes = additional notes

**Data S3. (separate file)**

Comma separated value file with posterior summary statistics and convergence diagnostics for all modeled covariates. Column headers are constructed with abbreviations for *variable name* [hyphen] *statistic name*.

Variable names refer to:

dist = distance traveled

dur = duration

pandemic = main effect of pandemic (pre- vs post-pandemic)

overlap = main effect of overlap between peak traffic reduction and peak bird counts

delta\_traf = main effect of traffic reduction

air = main effect of logged distance from airport

road = main effect of logged distance from road

land = main effect of local landcover (urban vs rural)

pandemic:overlap = interaction between pandemic and overlap

pandemic:delta\_traf = interaction between pandemic and delta\_traf

pandemic:air = interaction between pandemic and air

pandemic:road = interaction between pandemic and road

pandemic:land = interaction between pandemic and land

Statistic names refer to:

mean = mean

sd = standard deviation

lower = 2.5% quantile, i.e., lower limit of 95% credible interval

median = median, i.e. 50% quantile

upper = 97.5% quantile, i.e., upper limit of 95% credible interval

Rhat =  $\hat{R}$  value, used to check convergence

ESS = crude measure of effective sample size of the posterior

**Data S4. (separate file)**

R script file containing code used to extract and filter eBird data, prepare individual species data files, run each single-species model using the rstanarm interface with the Stan language, and interpret results.
